# Supplementary material
Source: publisher figshare collection journal article supplement (https://acs.figshare.com/ndownloader/files/3769117)
Supplement: Supplementary file 1 [file 3769117]

## Sheet: Output
Identifier	Mock.1.csv	Mock.2.csv	Mock.3.csv	siRNA.1.csv	siRNA.2.csv	siRNA.3.csv	Mr	Description	AA	NSAF.Mock	NSAF.siRNA	NSAF.Mock.1.csv	NSAF.Mock.2.csv	NSAF.Mock.3.csv	NSAF.siRNA.1.csv	NSAF.siRNA.2.csv	NSAF.siRNA.3.csv	statistic.t	p.value	pAdj	ratio	invratio
gi|189054794|	1	1	1	3	4	5	134400	unnamed protein product .PLN02959, aminoacyl-tRNA ligaseAnticodon_Ia_Leu_AEc, Anticodon-binding domain of archaeal and eukaryotic ...Anticodon_Ia_like, Anticodon-binding domain of class Ia aminoacyl tRNA ...LeuRS_core, catalytic core domain of leucyl-tRNA synthetasesnt_trans, nucleotidyl transferase superfamily	1178.95	2.16021e-05	5.96135e-05	-10.8384	-10.6846	-10.7118	-9.95421	-9.70714	-9.56038	-8.07961	0.00127494	0.147096	0.36237	2.75961
gi|71773201|	0	0	0	5	6	2	14500	APRT, adenine phosphoribosyltransferase isoform b .PRTases_typeI, Phosphoribosyl transferase (PRT)-type I domain	127.193	6.67432e-05	0.000601266	-9.71037	-9.5565	-9.58374	-7.27556	-7.11274	-8.12217	-6.67821	0.00261353	0.216637	0.111004	9.00865
gi|189053586|	17	18	17	32	36	31	68500	unnamed protein product .ERM, Ezrin/radixin/moesin familyB41, Band 4.1 homologuesFERM_M, FERM central domainFERM_N, FERM N-terminal domainFERM_C_ERM, ERM family FERM domain C-lobe/F3	600.877	0.000504467	0.00087536	-7.70771	-7.49827	-7.58108	-7.05175	-6.93992	-7.14115	-6.54526	0.00281652	0.216637	0.576297	1.73522
gi|189054508|	0	0	0	1	2	3	21800	unnamed protein product .Commd4, COMM_Domain containing protein 4. The COMM Domain is fou...	191.228	4.43934e-05	0.00020348	-10.1181	-9.96426	-9.9915	-8.9826	-8.47602	-8.19345	-6.25444	0.00333261	0.219714	0.218171	4.58357
gi|189054968|	0	0	0	1	2	3	47700		418.421	2.02888e-05	9.29951e-05	-10.9012	-10.7473	-10.7745	-9.76562	-9.25904	-8.97648	-6.25444	0.00333261	0.219714	0.218171	4.58357
gi|189053379|	216	191	165	245	273	282	57900	unnamed protein product .Pyruvate_Kinase, Pyruvate kinase (PK): Large allosteric enzyme that ...pyruv_kin, pyruvate kinase	507.895	0.00635603	0.00824138	-5.02421	-4.99304	-5.16619	-4.86158	-4.75781	-4.77935	-4.2214	0.0134625	0.471584	0.771234	1.29662
gi|37674405|	0	0	0	3	6	1	64400	ASNS, unknown .AsnB, Glutamine amidotransferases class-II (GATase) asparagine s...asnB, asparagine synthetase BAsn_Synthase_B_C, The C-terminal domain of Asparagine Synthase B. ...	564.912	1.50276e-05	0.000107573	-11.2013	-11.0475	-11.0747	-9.21851	-8.60371	-10.124	-4.03649	0.0156493	0.471584	0.139697	7.15835
gi|189053346|	5	6	5	11	9	16	21800	unnamed protein product .Ribosomal_L6 (2&times;), Ribosomal protein L6PTZ00027, 60S ribosomal protein L6	191.228	0.000519695	0.00101933	-7.72024	-7.39931	-7.59361	-6.94572	-7.14102	-6.64286	-3.83588	0.0185247	0.471584	0.509839	1.9614
gi|47678645|	6	6	4	19	16	10	63500	RANGAP1, RANGAP1 .RanGAP1_C, RanGAP1 C-terminal domainLRR_RI, Leucine-rich repeats (LRRs), ribonuclease inhibitor (RI)...	557.018	0.000177169	0.000439129	-8.62232	-8.46844	-8.86341	-7.48678	-7.65808	-8.16397	-3.77586	0.0195054	0.471584	0.403454	2.4786
gi|189053709|	1	1	2	4	6	13	70900	unnamed protein product .RRM3_hnRNPR, RNA recognition motif 3 in vertebrate heterogeneous ...RRM2_hnRNPR, RNA recognition motif 2 in vertebrate heterogeneous ...RRM1_hnRNPR, RNA recognition motif 1 in vertebrate heterogeneous ...hnRNP-R-Q, heterogeneous nuclear ribonucleoprotein R, Q family	621.93	5.03353e-05	0.000203438	-10.1989	-10.045	-9.56143	-9.06335	-8.69987	-8.02289	-3.71827	0.0205055	0.471584	0.247423	4.04166
gi|189067868|	183	144	131	201	201	211	47100	unnamed protein product .PLN00191, enolaseenolase, Enolase: Enolases are homodimeric enzymes that catalyse...	413.158	0.00623996	0.00777157	-4.98314	-5.0682	-5.18971	-4.85264	-4.85688	-4.86236	-3.71715	0.0205255	0.471584	0.802922	1.24545
gi|189053436|	0	0	0	1	4	1	21600	unnamed protein product .PRA1, PRA1 family protein	189.474	4.48045e-05	0.000208308	-10.1089	-9.95505	-9.98229	-8.97338	-7.87901	-9.03154	-3.67199	0.0213537	0.471584	0.215088	4.64927
gi|3419847|:reversed	0	0	0	1	4	1	42600		373.684	2.27177e-05	0.000105621	-10.7881	-10.6342	-10.6614	-9.65254	-8.55817	-9.7107	-3.67199	0.0213537	0.471584	0.215088	4.64927
gi|37674420|	0	0	0	1	4	1	32700	HSU53209, unknown .RRM_TRA2, RNA recognition motif in transformer-2 protein homolog...COG0724, RNA-binding proteins (RRM domain) [General function pre...	286.842	2.95956e-05	0.000137598	-10.5236	-10.3697	-10.397	-9.38807	-8.29369	-9.44622	-3.67199	0.0213537	0.471584	0.215088	4.64927
gi|117938254|	0	0	1	4	3	2	85900	BCLAF1, bcl-2-associated transcription factor 1 isoform 3 .	753.509	1.9013e-05	7.32561e-05	-11.4894	-11.3355	-10.2642	-9.25526	-9.51082	-9.9012	-3.43839	0.0263324	0.517124	0.259542	3.85294
gi|91208426|	3	1	3	7	6	6	273400	PRPF8, pre-mRNA-processing-splicing factor 8 .U5_2-snRNA_bdg, U5-snRNA binding site 2 of PrP8PROCN, PROCN (NUC071) domainMPN_PRP8, Mpr1p, Pad1p N-terminal (MPN) domains without isopepti...RRM_4, RNA recognition motif of the spliceosomal PrP8U6-snRNA_bdg, U6-snRNA interacting domain of PrP8PRO8NT, PRO8NT (NUC069), PrP8 N-terminal domainPRP8, U5 snRNP spliceosome subunit [RNA processing and modific…	2398.25	1.97761e-05	4.47365e-05	-10.7013	-11.3947	-10.5746	-9.90219	-10.0495	-10.1034	-3.32896	0.029134	0.527269	0.442058	2.26214
gi|158259889|	280	286	237	355	362	364	49900	unnamed protein product .PLN00220, tubulin beta chainbeta_tubulin, The tubulin superfamily includes five distinct fam...	437.719	0.010389	0.0129273	-4.61653	-4.44149	-4.6563	-4.34265	-4.32739	-4.3758	-3.30055	0.0299179	0.531043	0.803647	1.24433
gi|158260887|	0	0	0	5	1	1	85400	unnamed protein product .ARM (5&times;), Armadillo/beta-catenin-like repeats. An approximately 40 am...ARM, Armadillo/beta-catenin-like repeats	749.123	1.13323e-05	5.99007e-05	-11.4836	-11.3297	-11.3569	-9.04875	-10.3523	-10.4062	-3.2587	0.0311189	0.531902	0.189184	5.28585
gi|293336691|	0	0	1	4	2	2	55300		485.088	2.95338e-05	0.000102838	-11.049	-10.8951	-9.82376	-8.81485	-9.40688	-9.46079	-3.11353	0.0357495	0.558327	0.287188	3.48204
gi|11968182|	31	20	30	37	45	53	17700	RPS18, 40S ribosomal protein S18 .PTZ00134, 40S ribosomal protein S18	155.263	0.00298206	0.00458098	-5.76666	-6.04235	-5.67229	-5.55538	-5.36625	-5.25819	-3.07776	0.037012	0.558327	0.650966	1.53618
gi|62088916|	3	0	0	4	9	10	265900	Insulin-like growth factor 2 receptor variant, partial .CIMR (10&times;), Cation-independent mannose-6-phosphate receptor repeatFN2, Fibronectin Type II domain: FN2 is one of three types of in...Man-6-P_recep, Mannose-6-phosphate receptor	2332.46	1.02544e-05	5.46038e-05	-10.6734	-12.4655	-12.4927	-10.3852	-9.64223	-9.59605	-3.06227	0.037575	0.558327	0.187797	5.32489
gi|158255578|	2	1	1	3	2	3	19700	unnamed protein product .CGI-121, Kinase binding protein CGI-121	172.807	0.000177138	0.000286932	-8.40741	-8.76436	-8.7916	-8.03401	-8.37472	-8.09216	-3.0007	0.0399145	0.558327	0.617353	1.61982
gi|296010906|	8	10	11	20	17	15	42800	BCAT1, branched-chain-amino-acid aminotransferase, cytosolic isoform 5 .BCAT_beta_family, BCAT_beta_family: Branched-chain aminotransferase ...PRK13357, branched-chain amino acid aminotransferase	375.439	0.000462994	0.000746933	-7.95955	-7.59437	-7.53064	-7.04227	-7.20473	-7.38001	-2.93702	0.0425153	0.560595	0.619861	1.61327
gi|62088356|	1	0	1	3	3	2	76900	inter-alpha (globulin) inhibitor H4 (plasma Kallikrein-sensitive glycoprotein) variant, partial .marine_srt_targ, marine proteobacterial sortase target proteinVIT, Vault protein inter-alpha-trypsin domainvWA_interalpha_trypsin_inhibitor, vWA_interalpha trypsin inhibitor (ITI): ITI is a ...	674.561	2.88623e-05	7.39187e-05	-10.2801	-11.2249	-10.1535	-9.3959	-9.40014	-9.79052	-2.8252	0.0475764	0.58619	0.39046	2.56108
gi|189053381|	160	193	144	232	237	264	83200	unnamed protein product .PTZ00272, heat shock protein 83 kDa (Hsp83)HATPase_c, Histidine kinase-like ATPasesHSP90, Hsp90 protein	729.825	0.0038771	0.00525394	-5.68603	-5.34518	-5.66442	-5.27851	-5.26148	-5.20771	-2.81519	0.0480625	0.58619	0.737942	1.35512
gi|189069313|	3	0	0	4	5	10	69600	unnamed protein product .RRM3_hnRNPQ, RNA recognition motif 3 in vertebrate heterogeneous ...RRM2_hnRNPQ, RNA recognition motif 2 in vertebrate heterogeneous ...hnRNP-R-Q, heterogeneous nuclear ribonucleoprotein R, Q familyRRM1_hnRNPQ, RNA recognition motif 1 in vertebrate heterogeneous ...	610.526	3.91761e-05	0.000173794	-9.33308	-11.1251	-11.1524	-9.04484	-8.84841	-8.2557	-2.81388	0.0481264	0.58619	0.225417	4.43623
gi|21687129|	1	0	0	2	1	3	17700	NUDCD2, nudC domain-containing protein 2 .p23_NUDCD2_like, p23-like NUD (nuclear distribution) C-like found in ...	155.263	8.78005e-05	0.000250759	-8.81118	-9.75592	-9.78316	-8.26343	-8.7785	-7.98511	-2.80351	0.0486372	0.58619	0.350138	2.85601
gi|189067580|	21	27	25	36	34	40	39900	unnamed protein product .PTZ00169, ADP/ATP transporter on adenylate translocaseMito_carr (3&times;), Mitochondrial carrier protein	350	0.00121251	0.0016629	-6.9614	-6.5614	-6.66415	-6.39522	-6.45581	-6.34938	-2.65554	0.0566536	0.60437	0.729151	1.37146
gi|189053788|	14	12	12	21	17	36	63400	unnamed protein product .PCBP_like_KH (2&times;), K homology RNA-binding domain, PCBP_like. Members ...KH-I (2&times;), K homology RNA-binding domain, type I. KH binds single-st...RRM (2&times;), RRM (RNA recognition motif), also known as RBD (RNA binding...	556.14	0.00040011	0.000703953	-7.81839	-7.81294	-7.84018	-7.38757	-7.59766	-6.91646	-2.59599	0.0603024	0.60437	0.568377	1.7594
gi|189065486|	8	7	10	14	11	13	54600	unnamed protein product .fumC, fumarate hydrataseFumarase_classII, Class II fumarases	478.947	0.000313173	0.000431064	-8.20305	-8.17434	-7.86511	-7.63204	-7.86808	-7.76165	-2.55575	0.0629208	0.60437	0.726513	1.37644
gi|46367787|	4	0	2	12	7	9	70600	PABPC1, polyadenylate-binding protein 1 .RRM2_I_PABPs, RNA recognition motif 2 found in type I polyadenyl...PABP-1234, polyadenylate binding protein, human types 1, 2, 3, 4...RRM4_I_PABPs, RNA recognition motif 4 in type I polyadenylate-bi...RRM3_I_PABPs, RNA recognition motif 3 found in type I polyadenyl...PABP, Poly-adenylate binding protein, unique domainRRM1_I_PABPs, RNA recognition motif 1 i…	619.298	6.57766e-05	0.000249297	-9.09603	-11.1394	-9.55719	-8.03746	-8.55252	-8.37005	-2.5294	0.0647061	0.60437	0.263848	3.79006
gi|4507525|	0	1	0	1	3	3	45800	SEC62, translocation protein SEC62 .U79_P34, HSV U79 / HCMV P34Sec62, Translocation protein Sec62	401.754	3.6061e-05	0.000110079	-10.8605	-9.60803	-10.7339	-9.72497	-8.88192	-8.93583	-2.52883	0.064745	0.60437	0.327591	3.05259
gi|189053228|	3	1	3	6	4	10	15800	unnamed protein product .Ribosomal_L32_L32e, Ribosomal_L32_L32e: L32 is a protein from the large ...	138.596	0.000342202	0.000804239	-7.85033	-8.54375	-7.72369	-7.19436	-7.56633	-6.77294	-2.51303	0.0658444	0.60437	0.425498	2.35019
gi|45269149|	29	19	23	32	30	31	30800	QPRT, nicotinate-nucleotide pyrophosphorylase .nadC, nicotinate-nucleotide pyrophosphorylaseQPRTase, Quinolinate phosphoribosyl transferase (QAPRTase or QPR...	270.175	0.00150221	0.00182882	-6.3862	-6.64631	-6.48696	-6.25243	-6.32018	-6.34183	-2.50952	0.0660914	0.60437	0.821409	1.21742
gi|158255178|	1	3	2	6	6	4	20500	unnamed protein product .Caveolin, Caveolin	179.825	0.0002408	0.000510959	-8.95804	-7.95687	-8.32058	-7.45478	-7.45902	-7.88065	-2.50435	0.0664567	0.60437	0.471271	2.12192
gi|62702201|	0	2	2	7	6	6	105800	PSMD1, unknown .RPN2, 26S proteasome regulatory complex component [Posttranslati...PC_rep (4&times;), Proteasome/cyclosome repeat	928.07	3.46531e-05	0.000115605	-11.6978	-9.93447	-9.96171	-8.9528	-9.10015	-9.15406	-2.49382	0.0672092	0.60437	0.299755	3.33605
gi|189067854|	2	0	0	4	3	2	54200	unnamed protein product .DUF1899, Domain of unknown function (DUF1899)WD40, WD40 domain, found in a number of eukaryotic proteins that...DUF1900, Domain of unknown function (DUF1900)PTZ00421, coronin	475.439	3.94901e-05	0.000116101	-9.41947	-10.875	-10.9023	-8.79476	-9.05031	-9.4407	-2.48523	0.0678301	0.60437	0.340134	2.94002
gi|158255544|	4	2	3	5	5	11	30400	unnamed protein product .RRM_RALY, RNA recognition motif in vertebrate RNA-binding protei...COG0724, RNA-binding proteins (RRM domain) [General function pre...	266.667	0.000219635	0.000436789	-8.25344	-8.68736	-8.37813	-8.01585	-8.02009	-7.3364	-2.48366	0.067944	0.60437	0.50284	1.9887
gi|158259941|	3	5	5	8	10	28	28000	unnamed protein product .Ribosomal_L2, Ribosomal Proteins L2, RNA binding domainPTZ00180, 60S ribosomal protein L8Ribosomal_L2_C, Ribosomal Proteins L2, C-terminal domain	245.614	0.00033832	0.000996068	-8.42252	-7.81666	-7.8439	-7.49829	-7.29123	-6.34661	-2.42068	0.0727092	0.60437	0.339655	2.94416
gi|189065432|	7	0	0	9	9	12	11600	unnamed protein product .Sumo, Small ubiquitin-related modifier (SUMO)	101.754	0.000437226	0.00161283	-6.77918	-9.33336	-9.3606	-6.50587	-6.51011	-6.28958	-2.39315	0.0749112	0.60437	0.271093	3.68878
gi|189065192|	9	2	3	8	14	13	14800	unnamed protein product .PTZ00158, 40S ribosomal protein S15A	129.825	0.000649214	0.00146644	-6.78641	-7.96754	-7.65831	-6.86072	-6.33088	-6.45624	-2.37444	0.0764505	0.60437	0.442715	2.25879
gi|189053125|	4	4	3	5	9	17	17200	unnamed protein product .KOW_RPL26, KOW motif of Ribosomal Protein L26	150.877	0.000467706	0.0011131	-7.68391	-7.53004	-7.80859	-7.44632	-6.90401	-6.34702	-2.36722	0.0770537	0.60437	0.420183	2.37992
gi|33188456|	4	2	0	13	13	5	13600	UBE2D2, ubiquitin-conjugating enzyme E2 D2 isoform 2 .UBCc, Ubiquitin-conjugating enzyme E2, catalytic (UBCc) domain. ...	119.298	0.000344161	0.00143731	-7.44907	-7.88299	-9.51966	-6.31354	-6.31778	-7.26963	-2.33713	0.0796278	0.60437	0.239447	4.17628
gi|62630157|	28	25	18	30	45	36	59300	CCT7, unknown .TCP1_eta, TCP-1 (CTT or eukaryotic type II) chaperonin family, e...groEL, chaperonin GroEL	520.175	0.00078343	0.00113098	-7.07578	-7.03314	-7.38129	-6.97104	-6.57529	-6.8496	-2.2744	0.0853121	0.60437	0.692698	1.44363
gi|158254720|	1	2	0	3	3	5	25500	unnamed protein product .RRM1_SRSF9, RNA recognition motif 1 in vertebrate serine/arginin...COG0724, RNA-binding proteins (RRM domain) [General function pre...RRM_SF, RNA recognition motif (RRM) superfamily	223.684	0.000114577	0.000290443	-9.17629	-8.51159	-10.1483	-8.29207	-8.29631	-7.89824	-2.2637	0.0863265	0.60437	0.39449	2.53492
gi|158254916|	0	13	0	26	16	21	82600	unnamed protein product .vWA_ku, Ku70/Ku80 N-terminal domain. The Ku78 heterodimer (compo...Ku_PK_bind, Ku C terminal domain likeKU80, Ku-core domain, Ku80 subfamily	724.561	0.000119339	0.00046558	-11.4502	-8.00053	-11.3236	-7.44302	-7.92105	-7.71026	-2.25577	0.0870869	0.60437	0.256324	3.90132
gi|21614499|	26	43	24	46	54	55	69400	EZR, ezrin .Tape_meas_lam_C, Lambda phage tail tape-measure protein (Tape_me...ERM, Ezrin/radixin/moesin familyB41, Band 4.1 homologuesFERM_M, FERM central domainFERM_N, FERM N-terminal domainFERM_C_ERM, ERM family FERM domain C-lobe/F3	608.772	0.000887409	0.00134234	-7.30582	-6.65633	-7.25766	-6.70659	-6.55208	-6.58781	-2.13826	0.0992813	0.640816	0.661091	1.51265
gi|62702244|	1	0	0	4	1	1	45400	PREB, unknown	398.246	3.42306e-05	9.9277e-05	-9.75313	-10.6979	-10.7251	-8.61759	-9.72044	-9.77435	-2.06665	0.107638	0.642153	0.344799	2.90024
gi|3387980|	349	344	279	401	407	403	49600	beta-tubulin .PLN00220, tubulin beta chainbeta_tubulin, The tubulin superfamily includes five distinct fam...	435.088	0.0126306	0.0145706	-4.39057	-4.2511	-4.48744	-4.21494	-4.20435	-4.26812	-2.06286	0.108102	0.642153	0.866851	1.1536
gi|378404908|	434	0	0	499	451	456	31500		276.316	0.00810854	0.0266475	-3.71887	-10.3323	-10.3596	-3.54254	-3.64781	-3.69071	-2.04116	0.110797	0.642153	0.304289	3.28635
gi|63990762|	23	14	12	24	25	22	38400	HNRPD, unknown .RRM2_hnRNPD, RNA recognition motif 2 in heterogeneous nuclear ri...RRM1_hnRNPD_like, RNA recognition motif 1 in heterogeneous nuclear ...CBFNT, CBFNT (NUC161) domain	336.842	0.000833627	0.00112672	-6.83414	-7.16312	-7.33878	-6.75554	-6.71978	-6.89885	-2.03314	0.111812	0.642153	0.739869	1.35159
gi|189065292|	2	0	0	2	2	2	10100	unnamed protein product .SF3b10, Splicing factor 3B subunit 10 (SF3b10)	88.5965	0.000211917	0.000442598	-7.73932	-9.19489	-9.22213	-7.7024	-7.70664	-7.76055	-2.03118	0.112062	0.642153	0.478803	2.08854
gi|189053263|	16	11	12	18	15	26	11100	unnamed protein product .CY, Cystatin-like domain	97.3684	0.00232935	0.00323011	-5.94666	-6.1538	-6.09766	-5.79533	-5.9765	-5.49411	-2.02192	0.11325	0.642153	0.721135	1.3867
gi|301897479|	0	68	0	88	69	78	42200	ENO3, beta-enolase isoform 2 .PLN00191, enolaseenolase, Enolase: Enolases are homodimeric enzymes that catalyse...	370.175	0.00112482	0.00334116	-10.7786	-5.70479	-10.652	-5.56557	-5.81149	-5.74363	-1.99634	0.116603	0.642153	0.336656	2.9704
gi|189053386|	1	0	0	5	1	1	35000		307.018	4.4402e-05	0.000146158	-9.49296	-10.4377	-10.4649	-8.15676	-9.46028	-9.51419	-1.98982	0.117475	0.642153	0.303795	3.2917
gi|116805322|	0	366	0	401	442	348	290800		2550.88	0.000863979	0.00244957	-12.7089	-5.95784	-12.5822	-5.98358	-5.89059	-6.1833	-1.97075	0.120066	0.642153	0.352706	2.83522
sp|K1C10_HUMAN|	18	26	7	44	49	26	59500	Keratin, type I cytoskeletal 10; Cytokeratin-10; CK-10; Keratin-10; K10;	521.93	0.000570729	0.00121458	-7.51128	-6.99804	-8.28752	-6.59664	-6.4944	-7.17314	-1.96212	0.12126	0.642153	0.469899	2.12812
gi|158256646|	124	172	113	173	206	232	84600	unnamed protein product .PTZ00272, heat shock protein 83 kDa (Hsp83)HATPase_c, Histidine kinase-like ATPasesHSP90, Hsp90 protein	742.105	0.00314988	0.00430366	-5.95671	-5.47674	-5.92258	-5.58791	-5.41803	-5.35335	-1.95785	0.121855	0.642153	0.731907	1.36629
gi|42822874|	0	2	0	11	6	1	49900	RNH1, ribonuclease inhibitor .LRR_RI (2&times;), Leucine rich repeat, ribonuclease inhibitor typeLRR_RI, Leucine-rich repeats (LRRs), ribonuclease inhibitor (RI)...	437.719	4.68018e-05	0.000236362	-10.9462	-9.18294	-10.8196	-7.77383	-8.34862	-9.86886	-1.95697	0.121978	0.642153	0.198009	5.05027
gi|62089060|	1	1	0	4	4	1	24200	leukotriene A4 hydrolase variant, partial .GluZincin, Peptidase Gluzincin family (thermolysin-like proteina...	212.281	9.24747e-05	0.000261343	-9.12397	-8.97009	-10.0959	-7.98843	-7.99267	-9.1452	-1.95685	0.121994	0.642153	0.353845	2.8261
gi|14348900|	31	45	26	47	60	52	58000	heat shock protein .groEL, chaperonin GroELTCP1_zeta, TCP-1 (CTT or eukaryotic type II) chaperonin family, ...	508.772	0.0011589	0.00164964	-6.95353	-6.43194	-6.99975	-6.50587	-6.2682	-6.46394	-1.94868	0.123143	0.642153	0.702514	1.42346
gi|5031875|	133	0	0	118	115	94	65100	LMNA, lamin isoform C .LTD, Lamin Tail DomainApoLp-III_like (2&times;), Apolipophorin-III and similar insect proteinsFilament, Intermediate filament protein	571.053	0.00121267	0.00301531	-5.6249	-11.0583	-11.0855	-5.70717	-5.73705	-5.99163	-1.89462	0.131049	0.662295	0.402171	2.4865
gi|189053144|	45	0	0	24	41	59	14100	unnamed protein product .H2A, Histone 2A	123.684	0.00193978	0.0052621	-5.17154	-9.52853	-9.55577	-5.75366	-5.23088	-4.92451	-1.8839	0.132681	0.66557	0.368633	2.71273
gi|62702220|	16	23	16	23	28	30	10900	HSPE1, unknown .cpn10, Chaperonin 10 Kd subunit (cpn10 or GroES)	95.614	0.00336911	0.00450155	-5.92848	-5.42097	-5.80185	-5.53792	-5.34926	-5.33534	-1.86599	0.135458	0.66729	0.748434	1.33612
gi|158257480|	8	7	5	8	9	13	59200	unnamed protein product .RRM_CFIm68, RNA recognition motif of pre-mRNA cleavage factor Im...	519.298	0.000232636	0.000315447	-8.28393	-8.25523	-8.59262	-8.24701	-8.14003	-7.84254	-1.85424	0.137314	0.66729	0.737481	1.35597
gi|189053253|	3	1	4	5	4	9	17700	unnamed protein product .PTZ00191, 60S ribosomal protein L23aPRK14548, 50S ribosomal protein L23PRibosomal_L23eN, Ribosomal protein L23, N-terminal domain	155.263	0.000343064	0.000651111	-7.96388	-8.65731	-7.58593	-7.47497	-7.67988	-6.98658	-1.83564	0.140307	0.66729	0.526891	1.89793
gi|189053384|	0	2	0	4	1	4	70700	unnamed protein product .PEMT, Phospholipid methyltransferaseLBR_tudor, Lamin-B receptor of TUDOR domain	620.175	3.30327e-05	8.81062e-05	-11.2947	-9.53136	-11.168	-9.06052	-10.1634	-9.11868	-1.81276	0.144085	0.66729	0.374919	2.66724
gi|62988674|	9	11	4	17	12	14	64600	ATIC, unknown .IMPCH, Inosine monophosphate cyclohydrolase domain. This is the ...PurH, AICAR transformylase/IMP cyclohydrolase PurH (only IMP cyc...PRK07106, 5-aminoimidazole-4-carboxamide ribonucleotide transfor...	566.667	0.000254306	0.000410849	-8.26	-7.91507	-8.88058	-7.61217	-7.95288	-7.85837	-1.81251	0.144126	0.66729	0.618977	1.61557
gi|189053478|	17	21	24	29	28	29	27700	unnamed protein product .RRM1_SRSF1, RNA recognition motif 1 in serine/arginine-rich spli...COG0724, RNA-binding proteins (RRM domain) [General function pre...RRM2_SRSF1_like, RNA recognition motif 2 in serine/arginine-rich ...	242.982	0.00148973	0.00188242	-6.80231	-6.44259	-6.33921	-6.2432	-6.28193	-6.30135	-1.78622	0.148604	0.66729	0.791391	1.2636
gi|189053148|	5	2	1	5	4	17	21400	unnamed protein product .Ribosomal_L22, Ribosomal protein L22/L17e. L22 (L17 in eukaryot...	187.719	0.000277211	0.000753107	-7.70172	-8.33631	-8.87437	-7.6648	-7.86971	-6.5655	-1.77539	0.150491	0.66729	0.36809	2.71673
gi|20379056|	0	0	13	10	12	11	23400	RAB6B, small GTP binding protein RAB6B .PLN03108, Rab family proteinRab6, Rab GTPase family 6 (Rab6)	205.263	0.000411048	0.000878654	-10.189	-10.0351	-6.76649	-7.10752	-6.9374	-7.0747	-1.75156	0.154734	0.66729	0.467815	2.1376
gi|158255716|	12	19	8	21	18	27	54300	unnamed protein product .NOPS_p54nrb, NOPS domain, including C-terminal coiled-coil regio...RRM1_p54nrb, RNA recognition motif 1 in vertebrate 54 kDa nuclea...RRM_SF, RNA recognition motif (RRM) superfamily	476.316	0.000484703	0.000737948	-7.81187	-7.21332	-8.07091	-7.23263	-7.38715	-7.04465	-1.7508	0.154872	0.66729	0.656825	1.52248
gi|145309309|	3	1	0	4	3	3	292100	USP9X, probable ubiquitin carboxyl-terminal hydrolase FAF-X isoform 3 .peptidase_C19C, A subfamily of Peptidase C19. Peptidase C19 cont...UCH, Ubiquitin carboxyl-terminal hydrolase	2562.28	1.16757e-05	2.3508e-05	-10.7674	-11.4608	-12.5867	-10.4792	-10.7347	-10.7886	-1.74047	0.156752	0.66729	0.49667	2.01341
gi|122937472|:reversed	1	1	0	3	1	2	104800		919.298	2.13539e-05	4.26795e-05	-10.5897	-10.4358	-11.5616	-9.70545	-10.557	-10.1001	-1.72518	0.15958	0.66729	0.500331	1.99868
gi|62988952|	0	1	2	2	4	3	43600	MAT2A, unknown .S-AdoMet_synt_M, S-adenosylmethionine synthetase, central domainS-AdoMet_synt_C, S-adenosylmethionine synthetase, C-terminal domainS-AdoMet_synt_N, S-adenosylmethionine synthetase, N-terminal domainPTZ00104, S-adenosylmethionine synthase	382.456	6.84054e-05	0.000143481	-10.8113	-9.5588	-9.07521	-9.16492	-8.58138	-8.8866	-1.72315	0.159959	0.66729	0.476757	2.0975
gi|61744481|	19	34	16	38	37	35	61800	SLC3A2, 4F2 cell-surface antigen heavy chain isoform e DUF3459, Domain of unknown function (DUF3459)	542.105	0.000744405	0.00107628	-7.49657	-6.77215	-7.53699	-6.7794	-6.80996	-6.91868	-1.71614	0.161277	0.66729	0.691648	1.44582
gi|158257956|	2	0	0	1	3	2	93300	unnamed protein product .Nic96, Nup93/Nic96	818.421	2.29406e-05	4.78849e-05	-9.96261	-11.4182	-11.4454	-10.4365	-9.59345	-9.98384	-1.71376	0.161726	0.66729	0.479079	2.08734
gi|93141020|	22	8	21	26	32	27	39500	H2AFY, core histone macro-H2A.1 isoform 2 .PTZ00017, histone H2AH2A, Histone 2AMacro_H2A_like, Macro domain, Macro_H2A_like family. The macro d...	346.491	0.000843317	0.00130615	-6.90586	-7.72544	-6.82469	-6.70531	-6.50546	-6.72642	-1.70942	0.162552	0.66729	0.645649	1.54883
gi|62420277|	2	1	0	6	2	2	45100	PCYOX1, unknown, partial .Prenylcys_lyase, Prenylcysteine lyase	395.614	6.26204e-05	0.000153074	-9.23567	-9.59262	-10.7185	-8.24324	-9.20299	-9.2569	-1.70778	0.162864	0.66729	0.409087	2.44447
gi|4758012|	123	159	92	167	223	169	191500	CLTC, clathrin heavy chain 1 isoform 1 .CLH (6&times;), Clathrin heavy chain repeat homologyClathrin_propel (3&times;), Clathrin propeller repeatClathrin-link, Clathrin, heavy-chain linkerClathrin_H_link, Clathrin-H-linkClathrin, Region in Clathrin and VPS	1679.82	0.00126908	0.00174714	-6.78173	-6.37205	-6.94413	-6.44006	-6.15587	-6.48634	-1.7003	0.164298	0.66729	0.726379	1.37669
gi|194374463|	2	0	0	2	3	1	44800		392.982	4.77759e-05	0.000100492	-9.229	-10.6846	-10.7118	-9.19207	-8.85984	-9.76105	-1.68609	0.167057	0.66729	0.475422	2.1034
gi|189053663|	3	3	2	5	5	3	52600	unnamed protein product .PqqL, Predicted Zn-dependent peptidases [General function predic...Peptidase_M16, Insulinase (Peptidase family M16)Peptidase_M16_C, Peptidase M16 inactive domain	461.404	0.000116141	0.000165144	-9.05303	-8.89916	-9.26287	-8.56412	-8.56836	-9.07426	-1.685	0.167272	0.66729	0.703269	1.42193
gi|5803121|	2	0	0	3	2	1	59600	PDIA5, protein disulfide-isomerase A5 precursor .PDI_b_PDIR_N, PDIb family, PDIR subfamily, N-terminal TRX-like b ...PDI_a_PDIR (3&times;), PDIa family, PDIR subfamilyPTZ00102, disulphide isomerase	522.807	3.59121e-05	7.55806e-05	-9.51444	-10.97	-10.9972	-9.14105	-9.48176	-10.0465	-1.6848	0.167311	0.66729	0.47515	2.1046
gi|194272210|	6	1	3	5	6	9	71500	KARS, lysine--tRNA ligase isoform 1 .LysRS_N, LysRS_N: N-terminal, anticodon recognition domain of ly...PLN02502, lysyl-tRNA synthetaseLysRS_core, Lys_tRNA synthetase (LysRS) class II core domain. Cl...	627.193	0.000100219	0.000178129	-8.74097	-10.0534	-9.23338	-8.8711	-8.70829	-8.38271	-1.68422	0.167423	0.66729	0.562623	1.77739
gi|4507677|	98	107	60	107	130	155	92400	HSP90B1, endoplasmin precursor .HATPase_c, Histidine kinase-like ATPasesTRAP_alpha, Translocon-associated protein (TRAP), alpha subunitPRK05218, heat shock protein 90HSP90, Hsp90 protein	810.526	0.00185627	0.00252926	-6.27915	-6.03784	-6.63993	-6.15479	-5.96515	-5.84379	-1.68082	0.168092	0.66729	0.733918	1.36255
gi|189065273|	12	2	7	8	19	27	17200	unnamed protein product .PTZ00072, 40S ribosomal protein S13Ribosomal_S15p_S13e, Ribosomal protein S15 (prokaryotic)_S13 (eu...Ribosomal_S13_N, Ribosomal S13/S15 N-terminal domain	150.877	0.000815641	0.00190511	-6.66226	-8.11783	-7.04645	-7.011	-6.18489	-5.89503	-1.66085	0.172079	0.66729	0.428134	2.33572
gi|158261831|	14	13	21	21	21	26	53100	unnamed protein product .NAD_binding_2, NAD binding domain of 6-phosphogluconate dehydrog...PRK09287, 6-phosphogluconate dehydrogenase6PGD, 6-phosphogluconate dehydrogenase, C-terminal domain	465.789	0.000603386	0.00077804	-7.64111	-7.55869	-7.12057	-7.21028	-7.21452	-7.05934	-1.6454	0.175232	0.66729	0.77552	1.28946
gi|158256542|	16	23	4	30	27	30	62600	unnamed protein product .STI1, Heat shock chaperonin-binding motifTPR_12 (2&times;), Tetratricopeptide repeatTPR (3&times;), Tetratricopeptide repeat domainTPR_11 (2&times;), TPR repeat	549.123	0.000459074	0.000842165	-7.67648	-7.16897	-8.84914	-7.02519	-7.13298	-7.08335	-1.64029	0.176288	0.66729	0.545112	1.83449
gi|114155142|	2	6	1	8	5	6	267100	TPR, nucleoprotein TPR .TPR_MLP1_2, TPR/MLP1/MLP2-like proteinSmc, Chromosome segregation ATPases [Cell division and chromosom...DUF342, Protein of unknown function (DUF342)ApoLp-III_like, Apolipophorin-III and similar insect proteins	2342.98	2.58656e-05	4.58013e-05	-11.0144	-9.90503	-11.3986	-9.75371	-10.1933	-10.0801	-1.63603	0.177174	0.66729	0.564736	1.77074
gi|158254648|	14	8	11	23	13	15	46800	unnamed protein product .DEADc, DEAD-box helicases. A diverse family of proteins involved...PTZ00424, helicase 45HELICc, Helicase superfamily c-terminal domain	410.526	0.000469365	0.000670314	-7.51481	-7.89502	-7.61998	-6.99504	-7.55359	-7.46935	-1.62513	0.179461	0.66729	0.700217	1.42813
gi|7018426|	9	0	0	6	12	4	44700	DKFZp761C10121, hypothetical protein .TGS_YchF_C, TGS_YchF_C: This subfamily represents TGS domain-con...PTZ00258, GTP-binding proteinYchF, YchF GTPase	392.105	0.000139696	0.000315644	-7.89176	-10.6823	-10.7096	-8.23433	-7.58464	-8.6602	-1.62475	0.17954	0.66729	0.442575	2.2595
gi|189055056|	13	15	12	16	16	24	15900	unnamed protein product .ADF_coactosin_like, Coactosin-like members of the ADF homology domain ...	139.474	0.00168756	0.00214436	-6.50671	-6.21469	-6.45704	-6.26911	-6.27336	-5.93195	-1.6221	0.180101	0.66729	0.786973	1.27069
gi|158259663|	0	1	2	2	3	3	8000	unnamed protein product .GGL, G protein gamma subunit-like motifs, the alpha-helical G-ga...	70.1754	0.00037281	0.000706248	-9.11567	-7.86318	-7.3796	-7.46931	-7.13708	-7.19099	-1.6186	0.180845	0.66729	0.527874	1.89439
gi|16507237|	121	146	66	166	145	210	72300	HSPA5, 78 kDa glucose-regulated protein precursor .HSP70, Hsp70 proteinHSPA5-like_NBD, Nucleotide-binding domain of human HSPA5 and sim...	634.211	0.00298293	0.00429117	-5.82399	-5.48301	-6.30007	-5.47198	-5.61104	-5.29565	-1.61266	0.182114	0.66729	0.695132	1.43858
gi|189054898|	11	13	7	13	14	21	16400	unnamed protein product .PLN00210, 40S ribosomal protein S16	143.86	0.00127834	0.00178883	-6.69801	-6.3838	-6.99883	-6.50075	-6.43353	-6.09354	-1.61173	0.182314	0.66729	0.71462	1.39934
gi|3005698|	14	15	9	22	16	17	39400	aldolase C .FBP_aldolase_I_a, Fructose-1,6-bisphosphate aldolase	345.614	0.000645231	0.000856031	-7.3427	-7.12213	-7.63892	-6.86641	-7.1808	-7.17587	-1.61042	0.182595	0.66729	0.753748	1.3267
gi|158256526|	16	9	10	16	13	19	35200	unnamed protein product .RRM3_hnRNPH3, RNA recognition motif 3 in heterogeneous nuclear r...RRM2_hnRNPH3, RNA recognition motif 2 in heterogeneous nuclear r...COG0724 (2&times;), RNA-binding proteins (RRM domain) [General function pre...	308.772	0.000657876	0.000835459	-7.10076	-7.49896	-7.42612	-7.06384	-7.26875	-6.95494	-1.60721	0.183286	0.66729	0.787442	1.26993
gi|189053130|	11	10	15	21	18	14	18400	unnamed protein product .PTZ00241, 40S ribosomal protein S11	161.404	0.00131722	0.00177222	-6.81308	-6.75018	-6.38796	-6.15045	-6.30498	-6.60251	-1.58826	0.187424	0.673121	0.743258	1.34543
gi|158257114|	1	1	1	2	1	3	85500	unnamed protein product .6PF1K_euk, 6-phosphofructokinase, eukaryotic typeEukaryotic_PFK, Phosphofructokinase, a key regulatory enzyme in ...	750	3.39571e-05	5.19116e-05	-10.3861	-10.2323	-10.2595	-9.83838	-10.3534	-9.56006	-1.5824	0.188722	0.673247	0.654132	1.52874
gi|5729877|	120	150	73	153	151	235	70900	HSPA8, heat shock cognate 71 kDa protein isoform 1 .PTZ00009, heat shock 70 kDa proteinHSPA1-2_6-8-like_NBD, Nucleotide-binding domain of HSPA1-A, -B, -L, ...	621.93	0.00313784	0.00451801	-5.8127	-5.43651	-6.18043	-5.53373	-5.55108	-5.16387	-1.58013	0.18923	0.673247	0.694518	1.43985
gi|24308201|	0	0	2	4	2	1	46500	APMAP, adipocyte plasma membrane-associated protein .Str_synth, Strictosidine synthaseCOG3386, Gluconolactonase [Carbohydrate transport and metabolism...	407.895	4.94335e-05	0.000109956	-10.8757	-10.7218	-9.13961	-8.64153	-9.23356	-9.79829	-1.577	0.189927	0.673247	0.449576	2.22432
gi|19920317|	34	27	12	39	37	38	66000		578.947	0.000717426	0.00104309	-6.99177	-7.06468	-7.88037	-6.81951	-6.87571	-6.9033	-1.56037	0.193689	0.675401	0.687787	1.45394
gi|158256026|	51	55	32	56	60	90	70000	unnamed protein product .PTZ00009, heat shock 70 kDa proteinHSPA1-2_6-8-like_NBD, Nucleotide-binding domain of HSPA1-A, -B, -L, ...	614.035	0.00128247	0.00175665	-6.64999	-6.42132	-6.9837	-6.52041	-6.45625	-6.10745	-1.55845	0.194129	0.675401	0.730064	1.36974
gi|158261271|	40	45	55	60	62	62	46500	unnamed protein product .hsp47, Heat shock protein 47 (Hsp47), also called colligin, beca...	407.895	0.00197399	0.00237719	-6.48123	-6.21095	-6.03952	-6.04296	-6.01468	-6.06859	-1.55831	0.194162	0.675401	0.83039	1.20425
gi|189067237|	3	2	2	6	3	3	107900	unnamed protein product .Uso1_p115_head, Uso1 / p115 like vesicle tethering protein, head ...TPR_MLP1_2, TPR/MLP1/MLP2-like proteinUso1_p115_C, Uso1 / p115 like vesicle tethering protein, C termi...ApoLp-III_like, Apolipophorin-III and similar insect proteinsARM, Armadillo/beta-catenin-like repeats. An approximately 40 am...	946.491	5.02796e-05	7.49153e-05	-9.77152	-9.95412	-9.98136	-9.11556	-9.73884	-9.79275	-1.55585	0.194726	0.675401	0.671153	1.48997
gi|189066680|	1	0	3	2	4	4	52900	unnamed protein product .Hydrolase_4, Putative lysophospholipaseAbhydrolase_1, alpha/beta hydrolase foldEHN, Epoxide hydrolase N terminus	464.035	6.71152e-05	0.000129106	-9.90602	-10.8508	-8.93209	-9.35827	-8.77472	-8.82863	-1.55572	0.194756	0.675401	0.519844	1.92365
gi|194385728|	0	0	8	4	6	8	39800	unnamed protein product .Lamp, Lysosome-associated membrane glycoprotein (Lamp)	349.123	0.000158073	0.000290298	-10.7201	-10.5662	-7.76025	-8.48594	-8.12246	-7.90811	-1.54609	0.196981	0.678409	0.544519	1.83648
gi|158255580|	1	2	2	3	2	5	14500	unnamed protein product .Ribosomal_L29_HIP, Ribosomal L29 protein/HIP. L29 is a protein of the ...	127.193	0.000293282	0.000469001	-8.61176	-7.94706	-7.97431	-7.72754	-8.06825	-7.33371	-1.54084	0.198206	0.680091	0.625333	1.59915
gi|14210536|	74	58	70	110	86	75	49800	TUBB6, tubulin beta-6 chain .PLN00220, tubulin beta chainbeta_tubulin, The tubulin superfamily includes five distinct fam...	436.842	0.00262241	0.00327222	-5.94029	-6.0282	-5.86885	-5.50915	-5.75827	-5.94819	-1.53268	0.200125	0.683154	0.801414	1.24779
gi|158255518|	7	5	3	6	7	11	57900	unnamed protein product .ARM (3&times;), Armadillo/beta-catenin-like repeats. An approximately 40 am...SRP1, Karyopherin (importin) alpha [Intracellular trafficking an...IBB, Importin beta binding domain	507.895	0.000181127	0.000260765	-8.38689	-8.54318	-9.0224	-8.49307	-8.35421	-7.98068	-1.53076	0.200579	0.683154	0.694599	1.43968
gi|189065512|	0	0	2	3	2	1	36100	unnamed protein product .S1_IF2_alpha, S1_IF2_alpha: The alpha subunit of translation Ini...PTZ00248, eukaryotic translation initiation factor 2 subunit 1EIF_2_alpha, Eukaryotic translation initiation factor 2 alpha su...	316.667	6.36748e-05	0.000124781	-10.6225	-10.4686	-8.88645	-8.63969	-8.9804	-9.54514	-1.52571	0.201779	0.684714	0.510291	1.95967
gi|24234688|	25	39	13	35	38	62	73600	HSPA9, stress-70 protein, mitochondrial precursor .dnaK, molecular chaperone DnaKHSPA9-like_NBD, Nucleotide-binding domain of human HSPA9, Escher...	645.614	0.000692184	0.00109772	-7.40305	-6.81155	-7.9124	-7.03527	-6.95838	-6.52779	-1.50704	0.206277	0.685787	0.630566	1.58588
gi|189053116|	9	4	3	7	7	15	18600	unnamed protein product .Ribosomal_L21e, Ribosomal protein L21ePTZ00189, 60S ribosomal protein L21	163.158	0.000590108	0.000967878	-7.01495	-7.60829	-7.88685	-7.21441	-7.21866	-6.54663	-1.498	0.208493	0.685787	0.609693	1.64017
gi|62087344|	23	13	4	18	26	31	63500	chaperonin containing TCP1, subunit 3 (gamma) variant, partial .groEL, chaperonin GroELTCP1_gamma, TCP-1 (CTT or eukaryotic type II) chaperonin family,...	557.018	0.00040951	0.000714766	-7.33712	-7.73756	-8.86341	-7.53942	-7.18429	-7.06536	-1.49684	0.208779	0.685787	0.57293	1.74542
gi|63990763|	11	11	11	17	12	14	46400	HNRPDL, unknown .RRM2_hnRPDL, RNA recognition motif 2 in heterogeneous nuclear ri...RRM1_hnRPDL, RNA recognition motif 1 in heterogeneous nuclear ri...	407.018	0.000479717	0.000572001	-7.73803	-7.58416	-7.6114	-7.28125	-7.62197	-7.52746	-1.49577	0.209041	0.685787	0.838664	1.19237
gi|37674428|	1	1	6	6	4	6	13600	RPA3, unknown .RPA3, RPA3: A subfamily of OB folds similar to human RPA3 (also ...	119.298	0.000458128	0.00076552	-8.54768	-8.39381	-6.95471	-7.04442	-7.41639	-7.10258	-1.49459	0.209333	0.685787	0.598453	1.67097
gi|158260269|	5	0	1	6	4	3	44800	unnamed protein product .DnaJ_zf, Zinc finger domain of DnaJ and HSP40DnaJ_C, C-terminal substrate binding domain of DnaJ and HSP40DnaJ, DnaJ domain or J-domain. DnaJ/Hsp40 (heat shock protein 4...PTZ00037, DnaJ_C chaperone protein	392.982	0.00010189	0.000193954	-8.44054	-10.6846	-9.61319	-8.23656	-8.60853	-8.91375	-1.4671	0.216248	0.685787	0.525332	1.90356
gi|189054180|	121	85	93	131	102	159	48000	unnamed protein product .Filament, Intermediate filament protein	421.053	0.00399833	0.00486747	-5.41437	-5.61189	-5.54969	-5.29835	-5.55174	-5.16346	-1.46597	0.216537	0.685787	0.821439	1.21738
gi|3492872|	6	3	1	4	7	8	29200	BSG, basigin .IG_like, Immunoglobulin likeIg, Immunoglobulin domain	256.14	0.000246659	0.000416426	-7.84545	-8.31061	-9.18515	-8.17625	-7.66966	-7.59841	-1.46096	0.217822	0.685787	0.592322	1.68827
gi|189065466|	4	6	3	7	5	8	61200	unnamed protein product .Peptidases_S53, Peptidase domain in the S53 familyPro-peptidase_S53, Activation domain of S53 peptidases	536.842	0.000153794	0.000208711	-8.95315	-8.43155	-9.07783	-8.4054	-8.7198	-8.33839	-1.44631	0.221627	0.685787	0.736873	1.35709
gi|158257024|	10	10	8	16	9	18	40900	unnamed protein product, partial .PA2G4-like, Related to aminopepdidase M, this family contains pr...	358.772	0.000464362	0.000645748	-7.70283	-7.54896	-7.78751	-7.21392	-7.77024	-7.15767	-1.44115	0.222983	0.685787	0.719107	1.39061
gi|260763955|	2	0	3	6	3	3	16700	NDUFA13, NADH dehydrogenase .GRIM-19, GRIM-19 protein	146.491	0.000247706	0.000484034	-8.2422	-9.69776	-7.77909	-7.24976	-7.87304	-7.92695	-1.44082	0.223071	0.685787	0.511753	1.95407
gi|158937236|	18	23	11	20	48	26	103200	NPEPPS, puromycin-sensitive aminopeptidase	905.263	0.000334968	0.00055292	-8.06198	-7.66888	-8.41077	-7.9224	-7.0655	-7.72383	-1.41799	0.229173	0.685787	0.605816	1.65067
gi|194385568|	2	0	1	4	1	3	158600	unnamed protein product .BROMI, Broad-minded proteinNup160, Nucleoporin Nup120/160	1391.23	1.76911e-05	3.56566e-05	-10.4932	-11.9487	-10.8774	-9.86846	-10.9713	-10.1779	-1.40648	0.232314	0.685787	0.496152	2.01551
gi|158261817|	3	6	0	10	3	14	51100	unnamed protein product .eIF2_gamma, Gamma subunit of initiation factor 2 (eIF2 gamma)eIF2_gamma_II, eIF2_gamma_II: this subfamily represents the domain ...PTZ00327, eukaryotic translation initiation factor 2 gamma subun...eIF2_C, Initiation factor eIF2 gamma, C terminal	448.246	0.000133651	0.000329364	-9.0241	-8.25119	-10.8434	-7.88856	-8.99142	-7.62394	-1.37696	0.240564	0.691714	0.405785	2.46436
gi|189065474|	1	0	2	2	2	2	51900	unnamed protein product .PRK13930, rod shape-determining protein MreBHSPA13-like_NBD, Nucleotide-binding domain of human HSPA13 and s...	455.263	5.55868e-05	8.61317e-05	-9.88693	-10.8317	-9.24948	-9.33918	-9.34342	-9.39734	-1.36826	0.24305	0.691998	0.645369	1.5495
gi|209413738|	0	20	9	18	29	29	67700	RPN2, dolichyl-diphosphooligosaccharide--protein glycosyltransferase subunit 2 isoform 2 precursor .Ribophorin_II, Oligosaccharyltransferase subunit Ribophorin II	593.86	0.000304773	0.00068031	-11.2513	-7.38387	-8.18024	-7.60347	-7.14109	-7.195	-1.36803	0.243117	0.691998	0.447991	2.23219
gi|62822401|	4	8	4	9	15	6	123300	XPO1, unknown .CRM1_C, CRM1 C terminalXpo1, Exportin 1-like proteinCRM1, Importin beta-related nuclear transport receptor [Nuclear ...IBN_N, Importin-beta N-terminal domain	1081.58	9.28245e-05	0.000153281	-9.65362	-8.86376	-9.52699	-8.86948	-8.38418	-9.30713	-1.36614	0.243661	0.691998	0.605582	1.6513
gi|167234419|	6	0	1	4	3	7	108600	THRAP3, thyroid hormone receptor-associated protein 3 .THRAP3_BCLAF1, THRAP3/BCLAF1 family	952.632	4.74307e-05	8.437e-05	-9.15895	-11.57	-10.4987	-9.48975	-9.74531	-9.03708	-1.3541	0.247151	0.696522	0.562175	1.77881
gi|189067590|	3	3	6	13	8	4	40300	unnamed protein product .SAF_NeuB_like, C-terminal SAF domain of sialic acid synthetaseNeuB_NnaB, N-acetylneuraminate synthaseNeuB, NeuB family	353.509	0.000217637	0.000395648	-8.78667	-8.6328	-8.041	-7.39982	-7.86668	-8.55658	-1.34547	0.249683	0.698278	0.550076	1.81793
gi|62822413|	1	2	0	3	1	4	6000		52.6316	0.000486951	0.000936794	-7.72937	-7.06468	-8.70135	-6.84515	-7.69669	-6.65199	-1.33786	0.251938	0.698278	0.519805	1.9238
gi|158257340|	6	4	6	9	5	17	57800	unnamed protein product .ARM (3&times;), Armadillo/beta-catenin-like repeats. An approximately 40 am...SRP1, Karyopherin (importin) alpha [Intracellular trafficking an...IBB, Importin beta binding domain	507.018	0.000194004	0.000331412	-8.52827	-8.74212	-8.40163	-8.11185	-8.66264	-7.5591	-1.33696	0.252206	0.698278	0.585387	1.70827
gi|221043034|:reversed	2	0	1	1	3	3	16900		148.246	0.000166024	0.000298322	-8.2541	-9.70967	-8.6383	-8.728	-7.88495	-7.93886	-1.33031	0.254194	0.698278	0.556526	1.79686
gi|189055002|	0	2	6	5	5	7	69700	unnamed protein product .vWA_ku, Ku70/Ku80 N-terminal domain. The Ku78 heterodimer (compo...ku70, ATP-dependent DNA helicase II, 70 kDa subunit (ku70)SAP, SAP domainKU70, Ku-core domain, Ku70 subfamily	611.404	9.079e-05	0.000157568	-11.2804	-9.51712	-8.58885	-8.84561	-8.84985	-8.5936	-1.30048	0.263301	0.708534	0.576196	1.73552
gi|158256376|	0	3	1	4	3	2	123800	unnamed protein product .IBN_N, Importin-beta N-terminal domain	1085.96	2.97631e-05	5.08295e-05	-11.8549	-9.75511	-10.6296	-9.62075	-9.8763	-10.2667	-1.29506	0.26499	0.709766	0.585547	1.7078
gi|189055015|	67	58	24	69	66	84	57100	unnamed protein product .PDI_a_PDI_a&apos;_C, PDIa family, C-terminal TRX domain (a-) subfamilyPDI_a_family, Protein Disulfide Isomerase (PDIa) family, redox a...ER_PDI_fam, protein disulfide isomerase, eukaryoticPDI_b_family, Protein Disulfide Isomerase (PDIb) family, redox i...PDI_b&apos;_family, Protein Disulfide Isomerase (PDIb-) family, redox ...	500.877	0.00167918	0.00229536	-6.17576	-6.16498	-7.06258	-6.10963	-6.158	-5.97236	-1.2816	0.26923	0.710563	0.731557	1.36695
gi|54112117|	5	9	11	10	13	15	145700	SF3B1, splicing factor 3B subunit 1 isoform 1 .ARM, Armadillo/beta-catenin-like repeats. An approximately 40 am...SF3b1, Splicing factor 3B subunit 1CTD (2&times;), Spt5 C-terminal nonapeptide repeat binding Spt4HSH155, U2 snRNP spliceosome subunit [RNA processing and modific...	1278.07	0.000119241	0.000161031	-9.61988	-8.91946	-8.75565	-8.93633	-8.68926	-8.60502	-1.25343	0.278313	0.710563	0.740488	1.35046
sp|K22E_HUMAN|	15	16	22	25	36	19	65800	Keratin, type II cytoskeletal 2 epidermal; Cytokeratin-2e; CK-2e; Epithelial keratin-2e; Keratin-2 epidermis; Keratin-2e; K2e; Type-II keratin Kb2;	577.193	0.000537127	0.000741885	-7.78886	-7.57247	-7.28955	-7.2541	-6.8997	-7.58051	-1.25204	0.27877	0.710563	0.724004	1.38121
gi|158255722|	7	1	4	11	6	5	31000		271.93	0.000271529	0.000454528	-7.76216	-9.21773	-8.14636	-7.2978	-7.87258	-8.09355	-1.25181	0.278845	0.710563	0.597388	1.67395
gi|189053113|	4	3	11	7	8	23	15800	unnamed protein product .KOW_RPL27, KOW motif of eukaryotic Ribosomal Protein L27Ribosomal_L27e, Ribosomal L27e protein family	138.596	0.000802801	0.00146836	-7.59901	-7.69645	-6.53411	-7.05126	-6.93034	-5.96732	-1.23852	0.283241	0.710563	0.546732	1.82905
gi|189053579|	9	14	7	11	30	14	119400	unnamed protein product .Cse1, Cse1SXM1, Importin, protein involved in nuclear import [Posttranslat...IBN_N, Importin-beta N-terminal domain	1047.37	0.00017149	0.000283037	-8.87427	-8.29754	-8.98402	-8.64629	-7.67515	-8.47264	-1.23663	0.283868	0.710563	0.605893	1.65046
gi|62822297|	0	2	1	3	4	1	59200	PPM1G, unknown .PP2Cc (2&times;), Serine/threonine phosphatases, family 2C, catalytic domai...	519.298	5.06901e-05	9.65565e-05	-11.1171	-9.35384	-9.8919	-9.13431	-8.88724	-10.0398	-1.22076	0.289216	0.710563	0.524979	1.90484
gi|158255624|	0	19	17	30	37	19	78100	unnamed protein product .Dynamin_N, Dynamin familyDLP_1, Dynamin_like protein family includes dynamins and Mx prot...Dynamin_M, Dynamin central regionCOG0699, Predicted GTPases (dynamin-related) [General function p...GED, Dynamin GTPase effector domain	685.088	0.000323596	0.000671748	-11.3942	-7.57678	-7.71224	-7.24642	-7.04405	-7.75188	-1.2199	0.289507	0.710563	0.481722	2.07589
gi|189065268|	15	13	6	16	12	27	14200	unnamed protein product .H2B, Histone H2B	124.561	0.00159468	0.00235171	-6.25548	-6.23976	-6.99789	-6.15604	-6.43791	-5.70336	-1.21102	0.292543	0.710563	0.678095	1.47472
gi|14248495|	0	3	2	6	4	2	82600	MEG3, MEG3 .PH-like, Pleckstrin homology-like domain	724.561	5.26648e-05	9.82465e-05	-11.4502	-9.35045	-9.71417	-8.84836	-9.22033	-9.86203	-1.20927	0.293143	0.710563	0.536048	1.86551
gi|189053177|	7	1	3	3	7	17	23500	unnamed protein product .Ribosomal_L19e_E, Ribosomal protein L19e, eukaryotic. L19e is found ...	206.14	0.000329871	0.000711366	-7.48518	-8.94074	-8.12068	-8.21039	-7.45249	-6.65911	-1.20599	0.294277	0.710563	0.463715	2.1565
gi|189053312|	5	2	3	8	4	4	16800	unnamed protein product .OST3_OST6, OST3 / OST6 family	147.368	0.000432333	0.000623798	-7.45971	-8.0943	-7.78506	-6.98747	-7.6277	-7.68161	-1.20401	0.294959	0.710563	0.693066	1.44286
gi|62822278|	14	17	12	15	20	21	76700	GFPT1, unknown .PLN02981, glucosamine:fructose-6-phosphate aminotransferaseGFAT, Glutamine amidotransferases class-II (Gn-AT)_GFAT-type. Th...SIS_GlmS_GlmD_2, SIS (Sugar ISomerase) domain repeat 2 found in ...SIS_GlmS_GlmD_1, SIS (Sugar ISomerase) domain repeat 1 found in ...	672.807	0.000375307	0.000445739	-8.00883	-7.66691	-8.03062	-7.90522	-7.62987	-7.63616	-1.19967	0.296466	0.710563	0.841989	1.18766
gi|34577063|	2	0	1	2	4	1	50100	ADSS, adenylosuccinate synthetase isozyme 2 .AdSS, Adenylosuccinate synthetase (AdSS) catalyzes the first ste...	439.474	5.60041e-05	0.000101952	-9.34081	-10.7964	-9.725	-9.30389	-8.72034	-9.87286	-1.19518	0.298031	0.710563	0.549318	1.82044
gi|189065283|	1	5	2	4	3	11	9500	unnamed protein product .PLN00209, ribosomal protein S27	83.3333	0.000663583	0.00120616	-8.18891	-6.73575	-7.55145	-7.05337	-7.30893	-6.17325	-1.19061	0.299633	0.710563	0.550163	1.81764
gi|62988753|	18	19	6	23	19	22	57900	CCT4, unknown .groEL, chaperonin GroELTCP1_delta, TCP-1 (CTT or eukaryotic type II) chaperonin family,...	507.895	0.000492336	0.000673975	-7.48403	-7.27751	-8.40336	-7.20787	-7.3987	-7.30951	-1.18798	0.300558	0.710563	0.730496	1.36893
gi|189053306|	18	8	20	17	23	26	16300	unnamed protein product .PTZ00129, 40S ribosomal protein S14	142.982	0.00185892	0.00245964	-6.21647	-6.84031	-5.98719	-6.23512	-5.94456	-5.87833	-1.18453	0.301778	0.710563	0.755771	1.32315
gi|194390086|	11	6	12	16	16	10	16900	unnamed protein product .OCIA, Ovarian carcinoma immunoreactive antigen (OCIA)	148.246	0.00115415	0.00154199	-6.72805	-7.14472	-6.51803	-6.33011	-6.33435	-6.84025	-1.18059	0.303172	0.710563	0.748482	1.33604
gi|189054501|	7	9	1	13	9	8	42800	unnamed protein product .PCI, PCI domain	375.439	0.000277842	0.000440334	-8.08471	-7.69445	-9.56752	-7.46	-7.81564	-7.98078	-1.17919	0.303669	0.710563	0.63098	1.58484
gi|157738649|	16	7	10	18	11	17	102400		898.246	0.000212789	0.000276029	-8.16861	-8.80319	-8.49396	-8.01727	-8.49694	-8.13099	-1.17156	0.306397	0.710563	0.770894	1.2972
gi|189053244|	34	0	34	33	43	67	13900	unnamed protein product .H2B, Histone H2B	121.93	0.00313142	0.00614922	-5.43401	-9.51424	-5.30738	-5.4265	-5.16952	-4.78407	-1.16565	0.308522	0.713315	0.509239	1.96371
gi|221044854|	2	1	2	2	5	2	112500	unnamed protein product .Reticulon, Reticulon	986.842	3.69339e-05	5.58893e-05	-10.1497	-10.5067	-10.0231	-10.1128	-9.3286	-10.171	-1.1557	0.312133	0.718451	0.66084	1.51323
gi|158258006|	0	3	1	5	5	1	59300	unnamed protein product .LRR_8 (2&times;), Leucine rich repeatLRR_4, Leucine Rich repeats (2 copies)CAP_GLY, Cytoskeleton-associated proteins (CAPs) are involved in...UBQ, Ubiquitin-like proteinsLRR_RI, Leucine-rich repeats (LRRs), ribonuclease inhibitor (RI)...	520.175	6.21361e-05	0.000127127	-11.1188	-9.01905	-9.89359	-8.68402	-8.68826	-10.0415	-1.15079	0.313931	0.719004	0.488774	2.04594
gi|406719590|	0	2	2	3	3	2	109400	EMC1, ER membrane protein complex subunit 1 isoform 4 precursor .DUF1620, Protein of unknown function (DUF1620)	959.649	3.35128e-05	5.19593e-05	-11.7312	-9.96793	-9.99517	-9.7484	-9.75264	-10.143	-1.14327	0.316704	0.721772	0.64498	1.55043
gi|367460087|	6	17	0	8	13	26	228900	MYH10, myosin-10 isoform 2 DUF106, Integral membrane protein DUF106MYSc_type_II, Myosin motor domain, type II myosins. Myosin II me...	2007.89	7.0382e-05	0.000124767	-9.90456	-8.76029	-12.3429	-9.59937	-9.14099	-8.52045	-1.13364	0.320284	0.722846	0.564106	1.77272
gi|189054132|	1	5	3	4	5	6	82400	unnamed protein product .DEXDc (2&times;), DEAD-like helicases superfamily. A diverse family of prot...SPRY_DDX1, SPRY domain associated with DEAD box gene DDX1SrmB, Superfamily II DNA and RNA helicases [DNA replication, rec...HELICc, Helicase superfamily c-terminal domain	722.807	8.45811e-05	0.000118934	-10.3492	-8.89604	-9.37527	-9.21366	-9.01723	-8.90409	-1.13318	0.320453	0.722846	0.711161	1.40615
gi|4507729|	290	0	237	355	364	365	49900		437.719	0.00658722	0.0129631	-4.5815	-10.7924	-4.6563	-4.34265	-4.32189	-4.37306	-1.13259	0.320676	0.722846	0.508151	1.96792
gi|189069323|	21	18	12	30	25	17	37500	unnamed protein product .PTZ00480, serine/threonine-protein phosphataseMPP_PP1_PPKL, PP1, PPKL (PP1 and kelch-like) enzymes, and relat...	328.947	0.000895305	0.00117457	-6.89937	-6.89578	-7.31506	-6.51277	-6.69606	-7.12645	-1.12793	0.322425	0.722846	0.762242	1.31192
gi|189053296|	64	51	84	77	87	86	15000	unnamed protein product .PROF, Profilin binds actin monomers, membrane polyphosphoinositi...	131.579	0.00861749	0.00998672	-4.88446	-4.95568	-4.48775	-4.66393	-4.54681	-4.61221	-1.12614	0.323096	0.722846	0.862895	1.15889
gi|11641247|	4	6	4	7	5	7	17200	GLIPR2, Golgi-associated plant pathogenesis-related protein 1 isoform a .SCP_GAPR-1_like, SCP_GAPR-1_like: SCP-like extracellular protein ...	150.877	0.000585908	0.000709254	-7.68391	-7.16231	-7.55728	-7.13616	-7.45056	-7.19431	-1.12529	0.323418	0.722846	0.826091	1.21052
gi|189053099|	12	7	4	14	12	8	14200	unnamed protein product .LU, Ly-6 antigen / uPA receptor -like domain	124.561	0.00108815	0.00149802	-6.47059	-6.82755	-7.36561	-6.28525	-6.43791	-6.87748	-1.12523	0.32344	0.722846	0.726392	1.37667
gi|189053223|	14	11	0	18	16	12	23400	unnamed protein product .NAC, NAC domainEGD2, Transcription factor homologous to NACalpha-BTF3 [Transcri...	205.263	0.000713584	0.00121471	-6.82167	-6.8996	-10.0623	-6.54112	-6.65977	-6.99131	-1.11264	0.328221	0.726494	0.58745	1.70227
gi|95113651|	10	9	7	11	15	9	37400	GLRX3, glutaredoxin-3 .GRX_PICOT_like (2&times;), Glutaredoxin (GRX) family, PKC-interacting cousin ...TRX_PICOT, TRX domain, PICOT (for PKC-interacting cousin of TRX)...	328.07	0.000471742	0.000583909	-7.61337	-7.55959	-7.82321	-7.48548	-7.19123	-7.73469	-1.10468	0.331276	0.729109	0.807903	1.23777
gi|302699245|	0	15	4	16	7	12	176100	EIF4G1, eukaryotic translation initiation factor 4 gamma 1 isoform 6 .W2_eIF4G1_like, C-terminal W2 domain of eukaryotic translation i...MIF4G, MIF4G domainMA3, MA3 domain	1544.74	7.88575e-05	0.000123542	-12.2073	-8.61942	-9.88342	-8.67385	-9.46655	-9.00963	-1.10339	0.331772	0.729109	0.638307	1.56665
gi|158256224|	4	0	5	9	3	6	37800	unnamed protein product .PHB, prohibitin homologuesSPFH_like_u3, Uncharacterized family	331.579	0.000175666	0.000307681	-8.47131	-10.5147	-8.14401	-7.68717	-8.68994	-8.12481	-1.09986	0.333138	0.730371	0.570934	1.75152
gi|37674412|	28	30	24	29	31	48	72900	ERP70, unknown .PDI_b_ERp72, PDIb family, ERp72 subfamily, first redox inactive ...PDI_a_PDI_a&apos;_C, PDIa family, C-terminal TRX domain (a-) subfamilyER_PDI_fam, protein disulfide isomerase, eukaryoticPDI_a_family (2&times;), Protein Disulfide Isomerase (PDIa) family, redox a...PDI_b&apos;_ERp72_ERp57, PDIb- family, ERp72 and ERp57 subfamily, second ...PTZ00102, disulphide isomerase	639.474	0.000738945	0.000889793	-7.28226	-7.06057	-7.30686	-7.21085	-7.1495	-6.77183	-1.09156	0.336369	0.731989	0.830469	1.20414
gi|158257522|	11	0	14	12	12	22	23600	unnamed protein product .Ribosomal_L14e, Ribosomal protein L14KOW_RPL14, KOW motif of Ribosomal Protein L14	207.018	0.000709033	0.00119029	-7.06198	-10.0436	-6.70355	-6.94167	-6.94591	-6.41204	-1.08982	0.337048	0.731989	0.595679	1.67876
gi|62988860|	35	40	45	43	49	59	76600	NCL, unknown .RRM4_NCL, RNA recognition motif 4 in vertebrate nucleolinRRM3_NCL, RNA recognition motif 3 in vertebrate nucleolinRRM1_NCL, RNA recognition motif 1 in vertebrate nucleolinCOG0724 (2&times;), RNA-binding proteins (RRM domain) [General function pre...RRM2_NCL, RNA recognition motif 2 in vertebrate nucleolin	671.93	0.00102853	0.00118277	-7.11214	-6.8265	-6.73733	-6.87199	-6.74702	-6.61693	-1.08721	0.33807	0.732485	0.869595	1.14996
gi|158261433|	13	9	2	14	10	13	45500	unnamed protein product .RPN7, 26S proteasome regulatory complex component, contains PCI ...PCI, PCI domainRPN7, 26S proteasome subunit RPN7	399.123	0.000353293	0.000503963	-7.5581	-7.75563	-9.11787	-7.44972	-7.77673	-7.57933	-1.08505	0.338922	0.732611	0.70103	1.42647
gi|189053555|	6	0	2	8	6	2	57500	unnamed protein product .lectin_ERGIC-53_ERGL, ERGIC-53 and ERGL type 1 transmembrane proteins, ...ApoLp-III_like, Apolipophorin-III and similar insect proteins	504.386	0.000101155	0.000183363	-8.52306	-10.9341	-9.35194	-8.21787	-8.49038	-9.4998	-1.07357	0.343464	0.737249	0.551665	1.8127
gi|158256826|	3	11	3	8	17	6	88300	unnamed protein product .Integrin_beta, Integrin, beta chainIntegrin_B_tail, Integrin beta tail domainIntegrin_b_cyt, Integrin beta cytoplasmic domain	774.561	0.000138675	0.00022087	-9.57106	-8.2276	-9.44442	-8.64683	-7.92894	-8.97325	-1.06992	0.344922	0.73791	0.627858	1.59272
gi|189069164|	0	1	2	2	4	1	21400	unnamed protein product .ChSh, Chromo Shadow Domain, found in association with N-termina...CHROMO, Chromatin organization modifier (chromo) domain is a con...	187.719	0.000139368	0.000238682	-10.0996	-8.84713	-8.36355	-8.45326	-7.86971	-9.02223	-1.06501	0.346888	0.739065	0.583907	1.7126
gi|50592996|	159	141	0	192	183	165	50400	TUBB3, tubulin beta-3 chain isoform 1 .PLN00220, tubulin beta chainbeta_tubulin, The tubulin superfamily includes five distinct fam...	442.105	0.00378188	0.00641386	-5.19103	-5.1569	-10.8296	-4.96605	-5.01817	-5.17533	-1.06346	0.347513	0.739065	0.589641	1.69595
gi|189054322|	26	0	28	25	42	28	18700	unnamed protein product .ADF_cofilin_like, Cofilin, Destrin, and related actin depolymerizing ...	164.035	0.0018633	0.00308109	-5.99446	-9.81088	-5.79507	-5.996	-5.48942	-5.94293	-1.05636	0.350381	0.741007	0.604754	1.65357
gi|4501891|	64	86	0	74	130	71	103000	ACTN1, alpha-actinin-1 isoform b .efhand_Ca_insen, Ca2+ insensitive EF handCH (2&times;), Calponin homology domainSpectrin, Spectrin repeatEF_hand_5, EF-hand domain pairEFh, EF-hand, calcium binding motifSPEC (2&times;), Spectrin repeats, found in several proteins involved in cy...	903.509	0.000944649	0.00160596	-6.81114	-6.36379	-11.5443	-6.63009	-6.07375	-6.72934	-1.05521	0.350847	0.741007	0.588213	1.70006
gi|189053380|	10	11	1	11	13	11	61400	unnamed protein product .PGM1, Phosphoglucomutase 1 (PGM1) catalyzes the bidirectional in...PLN02307, phosphoglucomutase	538.596	0.000244595	0.000354636	-8.10911	-7.86427	-9.92839	-7.98122	-7.82512	-8.03937	-1.0476	0.353948	0.744179	0.689708	1.44989
gi|189067924|	3	6	0	5	4	6	82500	unnamed protein product .Peptidase_M49, Peptidase family M49	723.684	8.27826e-05	0.000118821	-9.50311	-8.7302	-11.3224	-9.01421	-9.21912	-8.9053	-1.04116	0.356591	0.746333	0.6967	1.43534
gi|62087400|	10	10	8	17	8	16	35500	polypyrimidine tract-binding protein 1 isoform c variant, partial .RRM1_PTBP1, RNA recognition motif 1 in vertebrate polypyrimidine...RRM2_PTBP1_like, RNA recognition motif 2 in polypyrimidine tract...	311.404	0.000534998	0.000711711	-7.56124	-7.40736	-7.64591	-7.01349	-7.73986	-7.13048	-1.03313	0.359912	0.746667	0.751707	1.33031
gi|217272851|	4	3	6	6	5	6	58900	P4HA1, prolyl 4-hydroxylase subunit alpha-1 isoform 3 precursor .P4Hc, Prolyl 4-hydroxylase alpha subunit homologuesP4Ha_N, Prolyl 4-Hydroxylase alpha-subunit, N-terminal region	516.667	0.000158863	0.000187043	-8.91484	-9.01228	-8.42049	-8.51019	-8.68149	-8.56835	-1.03098	0.360806	0.746667	0.849341	1.17738
gi|158256660|	36	34	10	34	49	34	66200	unnamed protein product WD40 (2&times;), WD40 domain, found in a number of eukaryotic proteins that...	580.702	0.000785174	0.00106912	-6.93845	-6.84093	-8.05775	-6.95788	-6.6011	-7.01603	-1.02273	0.364253	0.746667	0.734411	1.36164
gi|145309326|	4	24	3	11	29	12	177500	LAMC1, laminin subunit gamma-1 precursor .MCP_signal, Methyl-accepting chemotaxis protein (MCP), signaling...Domain I/II, C-terminal domainEGF_Lam (10&times;), Laminin-type epidermal growth factor-like domainLaminin_N, Laminin N-terminal (Domain VI)t_SNARE, Helical region found in SNAREsApoLp-III_like, Apolipophorin-III and similar insect proteinsDomain V, contains 4.5 EGF-like repeatsDomain VI, …	1557.02	0.000122371	0.000180512	-10.018	-8.1695	-10.1427	-9.04278	-8.10498	-9.01755	-1.01833	0.366104	0.746667	0.677911	1.47512
gi|189053377|	6	3	5	5	7	6	83600	unnamed protein product .Mitofilin, Mitochondrial inner membrane protein	733.333	0.000117993	0.000138996	-8.89732	-9.36249	-8.93774	-9.02745	-8.72154	-8.91855	-1.01749	0.366457	0.746667	0.848895	1.178
gi|189065143|	3	2	2	4	2	4	7800	unnamed protein product .S1_S28E, S1_S28E: S28E, S1-like RNA-binding domain. S1-like RNA-...	68.4211	0.000695535	0.000876267	-7.14444	-7.32704	-7.35428	-6.8562	-7.44823	-6.91435	-1.01372	0.368049	0.748259	0.793748	1.25985
gi|158255718|	14	12	2	15	15	12	48800	unnamed protein product .TrpRS_core, catalytic core domain of tryptophanyl-tRNA synthetas...S15_NS1_EPRS_RNA-bind, S15/NS1/EPRS_RNA-binding domain. This short domain ...	428.07	0.000383454	0.000532654	-7.55666	-7.55121	-9.18789	-7.45305	-7.45729	-7.72631	-1.00169	0.373174	0.75535	0.719894	1.38909
gi|63991119|	16	9	4	17	18	9	36000	FLJ10849, unknown, partial .CDC_Septin, CDC/Septin GTPase family	315.789	0.00053235	0.000758489	-7.12324	-7.52143	-8.29589	-7.02747	-6.97615	-7.69653	-0.995887	0.37567	0.75574	0.701856	1.42479
gi|158259989|	253	223	240	264	272	263	50100	unnamed protein product .PTZ00335, tubulin alpha chainalpha_tubulin, The tubulin superfamily includes five distinct fa...	439.474	0.00921152	0.00952541	-4.72174	-4.69382	-4.64775	-4.64233	-4.61678	-4.70428	-0.986343	0.379804	0.75574	0.967047	1.03408
gi|189054178|	80	79	46	93	91	76	66000	unnamed protein product .ApoLp-III_like, Apolipophorin-III and similar insect proteinsFilament, Intermediate filament protein	578.947	0.00200762	0.00236693	-6.14448	-6.0031	-6.56665	-5.95785	-5.98371	-6.21667	-0.984625	0.380553	0.75574	0.848196	1.17897
gi|158254714|	1	5	2	6	4	3	31200	unnamed protein product .LIM3_FHL, The third LIM domain of Four and a half LIM domains pr...LIM1_FHL3, The first LIM domain of Four and a half LIM domains p...LIM4_FHL3, The fourth LIM domain of Four and a half LIM domains ...LIM, LIM is a small protein-protein interaction domain, containi...LIM2_FHL3, The second LIM domain of Four and a half LIM domains ...	273.684	0.000202053	0.000278498	-9.37803	-7.92488	-8.74057	-7.87477	-8.24674	-8.55196	-0.984438	0.380634	0.75574	0.725508	1.37834
gi|105990539|	11	6	6	11	7	13	61500		539.474	0.000252237	0.000313625	-8.01977	-8.43644	-8.46368	-7.98285	-8.41453	-7.88065	-0.982702	0.381392	0.75574	0.804261	1.24338
gi|189069389|	3	2	0	2	3	3	66300	unnamed protein product .Pyr_redox, Pyridine nucleotide-disulphide oxidoreductasePyr_redox_2, Pyridine nucleotide-disulphide oxidoreductase	581.579	6.1754e-05	8.52185e-05	-9.28451	-9.46711	-11.1038	-9.58405	-9.25182	-9.30573	-0.972378	0.385924	0.758338	0.724655	1.37997
gi|189067888|	6	2	0	4	5	3	56000	unnamed protein product .UCH, Ubiquitin carboxyl-terminal hydrolaseUBQ, Ubiquitin-like proteinsUBQ, Ubiquitin homologuesPeptidase_C19A, A subfamily of Peptidase C19. Peptidase C19 cont...	491.228	0.000104521	0.000144254	-8.49663	-9.29827	-10.9349	-8.82743	-8.631	-9.1369	-0.971388	0.386361	0.758338	0.724562	1.38014
gi|9956035|	460	470	378	547	502	486	36000	similar to Homo sapiens glyceraldehyde-3-phosphate dehydrogenase (GAPDH) mRNA with GenBank Accession Number M33197.1 .Gp_dh_C, Glyceraldehyde 3-phosphate dehydrogenase, C-terminal do...Gp_dh_N, Glyceraldehyde 3-phosphate dehydrogenase, NAD binding d...GapA, Glyceraldehyde-3-phosphate dehydrogenase/erythrose-4-phosp...	315.789	0.0234332	0.0254641	-3.79428	-3.61893	-3.86375	-3.58431	-3.67432	-3.76059	-0.966853	0.388369	0.758338	0.920242	1.08667
gi|62822530|	7	2	2	3	5	11	10300	RPL37A, unknown .PTZ00255, 60S ribosomal protein L37a	90.3509	0.000754402	0.00117104	-6.66032	-7.60506	-7.6323	-7.38554	-6.93779	-6.2541	-0.959569	0.391612	0.759365	0.644217	1.55227
gi|189065448|	25	29	5	30	24	31	68500	unnamed protein product .Ribophorin_I, Ribophorin I	600.877	0.000566175	0.000751478	-7.33123	-7.03165	-8.73853	-7.11526	-7.33856	-7.14115	-0.945861	0.397777	0.760559	0.753416	1.32729
gi|158255312|	143	127	0	166	105	125	53700	unnamed protein product .HAUS2, HAUS augmin-like complex subunit 2Filament, Intermediate filament protein	471.053	0.00319651	0.00441774	-5.36016	-5.3245	-10.893	-5.17457	-5.6351	-5.51541	-0.943661	0.398775	0.760559	0.723562	1.38205
gi|158259677|	10	6	2	12	12	5	109400	unnamed protein product .eEF2_C_snRNP, eEF2_C_snRNP: This family includes a C-terminal po...eEF2_II_snRNP, Loc2 eEF2_C_snRNP, cd01514/C terminal domain:eEF2...PTZ00416, elongation factor 2EF2_IV_snRNP, EF-2_domain IV_snRNP domain is a part of 116kD U5-...Snu114p, Snu114p, a spliceosome protein, is a GTPaseEFG_II, Elongation Factor G, domain II	959.649	0.000112107	0.000167581	-8.68671	-9.01242	-9.99517	-8.47544	-8.47968	-9.35457	-0.941862	0.399592	0.760559	0.668973	1.49483
gi|189053607|	2	3	0	3	3	2	50300	unnamed protein product .Annexin (4&times;), AnnexinDAZAP2, DAZ associated protein 2 (DAZAP2)	441.228	8.33363e-05	0.000113009	-9.34479	-8.85445	-10.8276	-8.9714	-8.97564	-9.36602	-0.940517	0.400204	0.760559	0.737431	1.35606
gi|15808607|	8	2	3	4	7	7	10400	F1Fo-ATP synthase complex Fo membrane domain f subunit .WRW, Mitochondrial F1F0-ATP synthase, subunit f	91.2281	0.000867508	0.00111401	-6.54482	-7.61472	-7.30549	-7.14388	-6.6373	-6.69121	-0.929	0.405475	0.764898	0.778728	1.28415
gi|62988926|	1	3	0	2	6	1	82200	IF2, unknown, partial .aeIF5B_II, aeIF5B_II: This family represents the domain II of ar...IF-2, Translation-initiation factor 2PRK04004, translation initiation factor IF-2Translation_Factor_II_like, Translation_Factor_II_like: Elongation factor Tu ...IF2_eIF5B, Initiation Factor 2 (IF2)/ eukaryotic Initiation Fact...	721.053	4.38628e-05	7.68776e-05	-10.3468	-9.3456	-11.3187	-9.79902	-8.84775	-10.368	-0.921818	0.408791	0.764898	0.570554	1.75268
gi|62089314|	1	2	5	4	5	3	178400	Pro-alpha-1 type V collagen variant, partial .Collagen (3&times;), Collagen triple helix repeat (20 copies)COLFI, Fibrillar collagens C-terminal domainTSPN, Thrombospondin N-terminal -like domains	1564.91	3.50275e-05	4.52815e-05	-11.1216	-10.4569	-9.69573	-9.98611	-9.78968	-10.2956	-0.916609	0.411211	0.764898	0.773551	1.29274
gi|62087998|	3	0	3	5	3	2	15900	Thy-1 cell surface antigen variant, partial .IG_like, Immunoglobulin likeig, Immunoglobulin domain	139.474	0.000297043	0.000434028	-7.85663	-9.64867	-7.73	-7.36773	-7.82395	-8.21434	-0.915448	0.411751	0.764898	0.684386	1.46116
gi|158256300|	1	6	2	6	5	3	105900	unnamed protein product .Anticodon_Ia_Ile_BEm, Anticodon-binding domain of bacterial and ...ileS, isoleucyl-tRNA synthetasezf-FPG_IleRS, Zinc finger found in FPG and IleRSIleRS_core, catalytic core domain of isoleucyl-tRNA synthetases	928.947	6.59854e-05	8.77706e-05	-10.6001	-8.9799	-9.96265	-9.09685	-9.26814	-9.77404	-0.91165	0.413525	0.764898	0.751794	1.33015
gi|4826998|	2	5	9	8	5	13	76100	SFPQ, splicing factor, proline- and glutamine-rich .RRM1_PSF, RNA recognition motif 1 in vertebrate polypyrimidine t...RRM2_p54nrb_like, RNA recognition motif 2 in the p54nrb/PSF/PSP1 ...NOPS_PSF, NOPS domain, including C-terminal coiled-coil region, ...	667.544	0.000151753	0.000213553	-9.75884	-8.81651	-8.2972	-8.49814	-8.9377	-8.09367	-0.909289	0.414631	0.765409	0.710612	1.40724
gi|62988698|	33	23	23	24	34	43	16800	CALM2, unknown .EFh (2&times;), EF-hand, calcium binding motifPTZ00184, calmodulin	147.368	0.00305645	0.00361736	-5.65291	-5.85359	-5.88083	-5.92886	-5.59082	-5.41293	-0.904869	0.416708	0.765962	0.844941	1.18351
gi|189053156|	9	17	12	16	15	18	10900	unnamed protein product .Sumo, Small ubiquitin-related modifier (SUMO)	95.614	0.00237198	0.00275649	-6.48055	-5.71577	-6.07948	-5.89156	-5.95832	-5.8353	-0.880063	0.428523	0.768002	0.860509	1.1621
gi|189053169|	28	26	28	25	33	56	13900	unnamed protein product .H2B, Histone H2B	121.93	0.00387019	0.00490906	-5.62506	-5.54395	-5.49843	-5.69937	-5.43074	-4.96196	-0.877261	0.429875	0.768002	0.788377	1.26843
sp|ALDOA_RABIT|	67	71	56	98	73	69	38800	Fructose-bisphosphate aldolase A; EC 4.1.2.13; Muscle-type aldolase;	340.351	0.0032491	0.00372004	-5.78937	-5.57793	-5.84063	-5.37452	-5.67153	-5.7814	-0.870373	0.433213	0.768002	0.873405	1.14494
gi|158258703|	2	2	0	3	1	3	69700	unnamed protein product .FXR1P_C, Fragile X-related 1 protein C terminalKH-I (2&times;), K homology RNA-binding domain, type I. KH binds single-st...Agenet, Agenet domain	611.404	5.03299e-05	7.24073e-05	-9.67099	-9.51712	-11.1538	-9.29759	-10.1491	-9.35574	-0.870202	0.433296	0.768002	0.695095	1.43865
gi|13236587|	5	3	1	3	6	4	44800	TMEM43, transmembrane protein 43 .DUF1625, Protein of unknown function (DUF1625)	392.982	0.000147682	0.000193072	-8.44054	-8.73865	-9.61319	-8.8556	-8.2408	-8.66244	-0.87011	0.433341	0.768002	0.764905	1.30735
gi|3360464|	1	0	4	5	1	3	46200	cytosolic aspartate aminotransferase .Aminotran_1_2, Aminotransferase class I and IIAAT_like, Aspartate aminotransferase family. This family belongs...	405.263	9.12519e-05	0.000135573	-9.77059	-10.7153	-8.54535	-8.43439	-9.73791	-8.94452	-0.869691	0.433545	0.768002	0.673082	1.4857
gi|194387362|	14	0	12	13	9	14	35000	unnamed protein product .RRM2_hnRNPAB, RNA recognition motif 2 in heterogeneous nuclear r...CBFNT, CBFNT (NUC161) domainRRM1_hnRNPAB, RNA recognition motif 1 in heterogeneous nuclear r...	307.018	0.000490319	0.000636862	-7.22428	-10.4377	-7.24607	-7.25881	-7.61445	-7.24551	-0.865419	0.435627	0.768002	0.769899	1.29887
gi|194375660|	0	17	16	12	16	21	20500	unnamed protein product .UMP_CMP_kin_fam, UMP-CMP kinase familyADK, Adenylate kinase (ADK) catalyzes the reversible phosphoryl ...	179.825	0.00113365	0.00146049	-10.0567	-6.34743	-6.43351	-6.80085	-6.52746	-6.31668	-0.864977	0.435843	0.768002	0.776209	1.28831
gi|158258058|	3	6	4	5	6	6	34000	unnamed protein product .PTZ00169, ADP/ATP transporter on adenylate translocaseMito_carr (3&times;), Mitochondrial carrier protein	298.246	0.000279157	0.000323949	-8.61668	-7.84377	-8.23873	-8.12777	-7.96496	-8.01887	-0.858217	0.439155	0.768002	0.86173	1.16046
gi|2921873|	6	1	1	10	2	3	37100	BUB3, spleen mitotic checkpoint BUB3 WD40, WD40 domain, found in a number of eukaryotic proteins that...	325.439	0.000157272	0.000267142	-8.08489	-9.39736	-9.4246	-7.5684	-9.00772	-8.72516	-0.85774	0.43939	0.768002	0.58872	1.6986
gi|158257322|	22	14	20	17	24	31	18700	unnamed protein product .p23, p23 binds heat shock protein (Hsp)90 and participates in th...	164.035	0.00196516	0.00232983	-6.15809	-6.44358	-6.12455	-6.37248	-6.04025	-5.84284	-0.849236	0.443588	0.768002	0.84348	1.18556
gi|47678395|	11	8	7	13	10	9	72500	DDX17, DDX17 .DEXDc, DEAD-like helicases superfamilyDEADc, DEAD-box helicases. A diverse family of proteins involved...HELICc, Helicase superfamily c-terminal domain	635.965	0.000242009	0.000276221	-8.18432	-8.33273	-8.48513	-7.98705	-8.24261	-8.3966	-0.848568	0.443919	0.768002	0.876141	1.14137
gi|21361657|	40	52	7	34	43	65	56700	PDIA3, protein disulfide-isomerase A3 precursor .Thioredoxin, ThioredoxinPDI_a_PDI_a&apos;_C, PDIa family, C-terminal TRX domain (a-) subfamilyER_PDI_fam, protein disulfide isomerase, eukaryoticPDI_b&apos;_ERp72_ERp57, PDIb- family, ERp72 and ERp57 subfamily, second ...PDI_b_ERp57, PDIb family, ERp57 subfamily, first redox inactive ...	497.368	0.00113997	0.00149796	-6.67955	-6.26617	-8.23932	-6.80297	-6.57541	-6.22003	-0.847181	0.444607	0.768002	0.761011	1.31404
gi|158256878|	0	1	3	5	2	1	84800	unnamed protein product .TFR_dimer, Transferrin receptor-like dimerization domainM28_TfR, M28 Zn-peptidase Transferrin Receptor familyPA_TfR, PA_TfR: Protease-associated domain containing proteins l...	743.86	4.30179e-05	6.74681e-05	-11.4765	-10.224	-9.40398	-9.0417	-9.8344	-10.3991	-0.847107	0.444644	0.768002	0.637604	1.56837
gi|62088114|	2	4	0	2	4	3	105800	eukaryotic translation initiation factor 4 gamma, 2 variant, partial .W2_eIF4G1_like, C-terminal W2 domain of eukaryotic translation i...MIF4G, MIF4G domainMA3, Domain in DAP-5, eIF4G, MA-3 and other proteins	928.07	4.60835e-05	5.91281e-05	-10.0883	-9.34668	-11.5711	-10.0514	-9.46787	-9.7731	-0.845956	0.445216	0.768002	0.779384	1.28307
gi|158260297|	8	6	4	12	7	6	37500	unnamed protein product .MPN_eIF3f, Mpr1p, Pad1p N-terminal (MPN) domains without catalyt...	328.947	0.000331274	0.000423425	-7.82735	-7.94175	-8.33671	-7.40477	-7.91983	-8.11685	-0.843845	0.446266	0.768002	0.782368	1.27817
gi|9956026|	0	133	178	123	132	127	24400	similar to Homo sapiens mRNA for KIAA0120 gene with GenBank Accession Number D21261.1 Calponin, Calponin family repeat	214.035	0.00862148	0.00936793	-10.2308	-4.48969	-4.22644	-4.6845	-4.6184	-4.71077	-0.839313	0.448527	0.768515	0.920319	1.08658
gi|37674392|	22	12	16	21	19	19	11700	CYCS, unknown	102.632	0.0027965	0.00308415	-5.68915	-6.12307	-5.87268	-5.69769	-5.79957	-5.85348	-0.832501	0.451944	0.768515	0.906735	1.10286
gi|30172037|	6	8	2	11	11	4	156200	kinectin variant 1 .Smc, Chromosome segregation ATPases [Cell division and chromosom...DUF3584, Protein of unknown function (DUF3584)	1370.18	7.22597e-05	0.000105923	-9.52241	-9.10028	-10.3513	-8.91495	-8.91919	-9.91137	-0.827533	0.454448	0.76947	0.682188	1.46587
gi|158259489|	1	5	0	3	3	2	144400	unnamed protein product .Anticodon_Ia_Ile_ABEc, Anticodon-binding domain of archaeal, bacterial, ...PLN02882, aminoacyl-tRNA ligaseIleRS_core, catalytic core domain of isoleucyl-tRNA synthetases	1266.67	3.44402e-05	3.93653e-05	-10.9102	-9.45705	-11.8822	-10.026	-10.0302	-10.4206	-0.824439	0.456013	0.76947	0.874886	1.14301
gi|189054352|	5	5	2	5	8	4	115300	unnamed protein product .Ank_5, Ankyrin repeats (many copies)DUF342, Protein of unknown function (DUF342)Ank_4 (2&times;), Ankyrin repeats (many copies)ANK (2&times;), ankyrin repeatsAnk_2, Ankyrin repeats (3 copies)	1011.4	7.50149e-05	9.60785e-05	-9.38587	-9.232	-10.0477	-9.34894	-8.91787	-9.60777	-0.821127	0.457693	0.769604	0.780766	1.28079
gi|62822324|	6	2	3	5	3	8	11800	DBI, unknown .ACBP, Acyl CoA binding protein (ACBP) binds thiol esters of long...	103.509	0.000665211	0.000876687	-6.93938	-7.74102	-7.43178	-7.06951	-7.52573	-6.69234	-0.819356	0.458594	0.769604	0.758778	1.31791
gi|4504253|	21	0	18	8	20	30	15100	H2AFX, histone H2AX .PTZ00017, histone H2AH2A, Histone 2A	132.456	0.00167271	0.00232421	-5.98972	-9.59705	-6.01337	-6.88078	-6.00467	-5.66128	-0.812745	0.461968	0.77027	0.719689	1.38949
gi|75709204|	12	0	4	9	6	5	22400	SAR1B, GTP-binding protein SAR1b .COG1100, GTPase SAR1 and related small G proteins [General funct...Sar1, Sar1 is an essential component of COPII vesicle coats	196.491	0.000476119	0.000574717	-6.92641	-9.99141	-7.82143	-7.16392	-7.54766	-7.76862	-0.812372	0.462159	0.77027	0.82844	1.20709
gi|158257358|	2	0	4	7	4	1	13900	unnamed protein product .TRP14_like, Human TRX-related protein 14 (TRP14)-like family	121.93	0.000345477	0.000586297	-8.05868	-9.51424	-7.34426	-6.92314	-7.43821	-8.59073	-0.812039	0.462329	0.77027	0.589253	1.69707
gi|62420310|	15	11	27	17	21	36	22100	RPS7, unknown .Ribosomal_S7e, Ribosomal protein S7e	193.86	0.00159507	0.00201902	-6.69782	-6.84244	-5.99784	-6.53953	-6.33792	-5.86257	-0.808418	0.464186	0.771971	0.790023	1.26579
gi|62822223|	1	2	1	5	2	1	17400	LOC51240, unknown .ORMDL, ORMDL family	152.632	0.000206158	0.00032881	-8.79408	-8.12939	-8.66745	-7.45788	-8.25058	-8.81531	-0.80243	0.467271	0.774311	0.626982	1.59494
gi|158256964|	3	3	3	4	4	3	54100	unnamed protein product .AAA, The AAA+ (ATPases Associated with a wide variety of cellula...DLIC, Dynein light intermediate chain (DLIC)	474.561	0.000125221	0.000138123	-9.08115	-8.92728	-8.95452	-8.79291	-8.79715	-9.10238	-0.798703	0.469199	0.774724	0.906589	1.10304
gi|30142021|	2	2	0	1	4	2	42200	EIF3S9, unknown, partial .RRM_eIF3B, RNA recognition motif in eukaryotic translation initi...	370.175	8.31279e-05	0.000120223	-9.16921	-9.01534	-10.652	-9.64311	-8.54874	-9.19044	-0.79364	0.471828	0.775856	0.691445	1.44625
gi|189053260|	3	1	0	1	3	2	10800	unnamed protein product .Sm_E, Sm protein E	94.7368	0.000315784	0.000413672	-7.46986	-8.16329	-9.28914	-8.28024	-7.43718	-7.82756	-0.786957	0.475315	0.777865	0.763369	1.30998
gi|3360491|	35	41	50	45	57	51	20700	ADP-ribosylation factor 1 .COG1100, GTPase SAR1 and related small G proteins [General funct...Arf1_5_like, ADP-ribosylation factor-1 (Arf1) and ADP-ribosylati...	181.579	0.00399984	0.00444789	-5.80368	-5.49365	-5.32461	-5.51858	-5.28875	-5.45286	-0.772773	0.482783	0.781769	0.899266	1.11202
gi|47678663|	1	3	2	1	3	19	46100	RPL3, RPL3 .Ribosomal_L3, Ribosomal protein L3PTZ00103, 60S ribosomal protein L3	404.386	0.00010708	0.000308574	-9.76843	-8.76726	-9.13097	-9.7315	-8.88845	-7.22471	-0.766391	0.486172	0.784091	0.347016	2.88171
gi|158255570|	0	1	12	4	5	4	42400	unnamed protein product .NDUFA9_like_SDR_a, NADH dehydrogenase (ubiquinone) 1 alpha subcomplex, ...Epimerase, NAD dependent epimerase/dehydratase family	371.93	0.000227285	0.000204061	-10.7834	-9.53089	-7.43787	-8.54923	-8.3528	-8.60738	-0.763685	0.487614	0.784091	1.11381	0.89782
gi|14670392|:reversed	4	4	0	4	2	6	170800		1498.25	3.54111e-05	4.67379e-05	-9.97949	-9.82562	-12.0501	-9.94257	-10.5346	-9.633	-0.760926	0.489088	0.784929	0.757653	1.31987
gi|189065399|	22	21	22	28	43	19	99600	unnamed protein product .SNc (4&times;), Staphylococcal nuclease homologuesTUDOR, Tudor domains are found in many eukaryotic organisms and ...SNc (5&times;), Staphylococcal nuclease homologues. SNase homologues are fo...TUDOR, Tudor domain	873.684	0.000430383	0.000551018	-7.83073	-7.72232	-7.70409	-7.55741	-7.1388	-7.99506	-0.753467	0.493091	0.784929	0.781068	1.2803
gi|189065207|	5	2	4	7	2	13	17800	unnamed protein product .Ribosomal_L24e_L24, Ribosomal protein L24e/L24 is a ribosomal protein ...	156.14	0.000445429	0.000776726	-7.51753	-8.15211	-7.59157	-7.17045	-8.2733	-6.64082	-0.752942	0.493373	0.784929	0.573471	1.74377
gi|24638454|	2	5	3	8	2	8	114700	ATP2A2, sarcoplasmic/endoplasmic reticulum calcium ATPase 2 isoform b .Cation_ATPase_C, Cation transporting ATPase, C-terminusATPase-IIA1_Ca, sarco/endoplasmic reticulum calcium-translocating ...HAD, haloacid dehalogenase-like hydrolaseCation_ATPase_N, Cation transporter/ATPase, N-terminusE1-E2_ATPase, E1-E2 ATPaseHydrolase_like2, Putative hydrolase of sodium-potassium ATPase alpha ...	1006.14	6.58742e-05	0.000100821	-10.1691	-9.22678	-9.706	-8.90841	-10.1364	-8.96656	-0.751431	0.494187	0.784929	0.653378	1.53051
gi|189053243|	8	4	7	21	11	4	17200	unnamed protein product .Mago_nashi, Mago nashi proteins, integral members of the exon ju...	150.877	0.000758807	0.00131562	-7.04792	-7.53004	-7.04645	-6.08301	-6.71296	-7.70514	-0.750636	0.494616	0.784929	0.576767	1.7338
gi|189066542|	23	14	10	17	22	18	19600	unnamed protein product .TCTP, Translationally controlled tumor protein	171.93	0.00156533	0.00178033	-6.16161	-6.49059	-6.8406	-6.41948	-6.17241	-6.42207	-0.750038	0.494939	0.784929	0.879233	1.13735
gi|160420317|	230	323	148	270	326	273	280600	FLNA, filamin-A isoform 2 .IG_FLMN (22&times;), Filamin-type immunoglobulin domainsCH (2&times;), Calponin homology domain	2461.4	0.00162214	0.00185076	-6.53976	-6.04694	-6.85279	-6.34281	-6.1589	-6.38994	-0.745626	0.497325	0.785417	0.876472	1.14094
gi|55770844|	5	7	9	7	9	11	100000	CTNNA1, catenin alpha-1 isoform 1 .Vinculin, Vinculin family	877.193	0.000146749	0.000169182	-9.2435	-8.77947	-8.57033	-8.89642	-8.66428	-8.52713	-0.74475	0.497799	0.785417	0.867408	1.15286
gi|59859885|	25	11	23	24	21	27	32800	RPSA, 40S ribosomal protein SA .PTZ00254, 40S ribosomal protein SARPS2, Ribosomal protein S2 (RPS2), involved in formation of the ...	287.719	0.00117232	0.00133271	-6.59483	-7.23729	-6.54988	-6.59791	-6.73277	-6.54055	-0.742755	0.498881	0.785781	0.879654	1.13681
gi|62088520|	5	1	10	11	6	5	27800	proteasome beta 2 subunit variant, partial .proteasome_beta_type_2, proteasome beta type-2 subunit. The 20S proteasome, ...PRE1, 20S proteasome, alpha and beta subunits [Posttranslational...	243.86	0.000404226	0.000506848	-7.96337	-9.10878	-7.19011	-7.18884	-7.76363	-7.9846	-0.729289	0.506233	0.794661	0.797529	1.25387
gi|5729953|	10	18	5	15	17	11	38200	NUDC, nuclear migration protein nudC .p23_mNUDC_like, p23-like NUD (nuclear distribution) C-like domain ...Nudc_N, N-terminal conserved domain of Nudc	335.088	0.000588132	0.000697149	-7.63454	-6.91427	-8.15453	-7.20815	-7.09103	-7.5648	-0.723378	0.509486	0.796391	0.843624	1.18536
gi|189053347|	4	6	1	5	3	8	83500	unnamed protein product .2OG-FeII_Oxy, 2OG-Fe(II) oxygenase superfamilyP4Hc, Prolyl 4-hydroxylase alpha subunit homologues	732.456	9.6782e-05	0.000123891	-9.26385	-8.74225	-10.2358	-9.02625	-9.48248	-8.64909	-0.723338	0.509508	0.796391	0.781186	1.28011
gi|158259701|	7	3	0	7	2	5	51500	unnamed protein product .U1snRNP70_N, U1 small nuclear ribonucleoprotein of 70kDa MW N te...RRM_snRNP70, RNA recognition motif in U1 small nuclear ribonucle...COG0724, RNA-binding proteins (RRM domain) [General function pre...	451.754	0.000138316	0.000179299	-8.26976	-8.87803	-10.8512	-8.23283	-9.33569	-8.60114	-0.72257	0.509932	0.796391	0.771427	1.2963
gi|158255732|	12	3	14	15	11	11	17600	unnamed protein product .MAPEG, MAPEG family	154.386	0.00110062	0.00130662	-6.68525	-7.80434	-6.4102	-6.43321	-6.73595	-6.78986	-0.711823	0.515888	0.800575	0.842344	1.18716
gi|189065464|	10	11	3	7	17	10	53900	unnamed protein product .Sugar_tr, Sugar (and other) transporterMFS (2&times;), The Major Facilitator Superfamily (MFS) is a large and dive...	472.807	0.000303321	0.000393142	-7.97883	-7.73399	-8.95081	-8.27838	-7.43533	-8.00006	-0.708729	0.517613	0.800575	0.771532	1.29612
gi|189055338|	12	8	13	17	15	10	44100	unnamed protein product .Filament, Intermediate filament protein	386.842	0.000501691	0.000590981	-7.60381	-7.8356	-7.40022	-7.23041	-7.35602	-7.79939	-0.708366	0.517815	0.800575	0.848912	1.17798
gi|223029410|	111	184	95	155	185	142	269600	TLN1, talin-1 .talin-RS (3&times;), rod-segment of the talin C-terminal domainI_LWEQ, I/LWEQ domainILWEQ, I/LWEQ domainB41, Band 4.1 homologuesFERM_M, FERM central domainFERM_C_Talin, Talin FERM domain C-lobe/F3FERM_N, FERM N-terminal domainVBS, Vinculin Binding SiteTalin_middle, Talin, middle domain	2364.91	0.000946164	0.00107107	-7.22599	-6.5685	-7.25426	-6.85645	-6.68428	-7.0019	-0.69683	0.524283	0.801189	0.883383	1.13201
gi|62988809|	2	2	0	1	3	2	82600	NCKAP1, unknown, partial .Nckap1, Membrane-associated apoptosis protein	724.561	4.24697e-05	5.40879e-05	-9.8408	-9.68693	-11.3236	-10.3147	-9.47164	-9.86203	-0.69632	0.524571	0.801189	0.785198	1.27356
gi|50659052|	4	2	0	2	4	2	50200	septin 6 isoform E .CDC_Septin, CDC/Septin GTPase family	440.351	9.32387e-05	0.000113183	-8.75502	-9.18893	-10.8256	-9.30588	-8.72233	-9.36403	-0.692561	0.526692	0.801189	0.823789	1.2139
gi|7328147|	13	17	2	21	19	7	55700	DKFZp762H186, hypothetical protein, partial .DUF1899, Domain of unknown function (DUF1899)WD40, WD40 domain, found in a number of eukaryotic proteins that...DUF1900, Domain of unknown function (DUF1900)	488.596	0.000386811	0.000524179	-7.76037	-7.34699	-9.32014	-7.25808	-7.35996	-8.36938	-0.688034	0.529254	0.801189	0.737936	1.35513
gi|62822274|	6	2	13	11	5	13	14500	RPL31, unknown .Ribosomal_L31e, Eukaryotic/archaeal ribosomal protein L31	127.193	0.00100027	0.00124665	-7.14543	-7.94706	-6.28791	-6.53796	-7.2798	-6.43577	-0.685545	0.530667	0.801189	0.802367	1.24631
gi|189053746|	6	3	5	6	9	4	24800	unnamed protein product .Ribosomal_L1, Ribosomal protein L1. The L1 protein, located near ...	217.544	0.00039775	0.000495644	-7.68212	-8.14729	-7.72254	-7.6452	-7.26995	-8.07107	-0.685444	0.530724	0.801189	0.802491	1.24612
gi|189053352|	16	4	9	13	11	11	12800	unnamed protein product .TBCA, Tubulin binding cofactor A	112.281	0.00149006	0.00170154	-6.08916	-7.23457	-6.5146	-6.25291	-6.4175	-6.47141	-0.681519	0.532958	0.801189	0.875707	1.14193
gi|62089306|	65	137	51	67	199	108	288000	spectrin, alpha, non-erythrocytic 1 (alpha-fodrin) variant, partial .EF-hand_7, EF-hand domain pairSH3_Alpha_Spectrin, Src homology 3 domain of Alpha SpectrinSpectrin (2&times;), Spectrin repeatEFh, EF-hand, calcium binding motifSPEC (12&times;), Spectrin repeats, found in several proteins involved in cy...EFhand_Ca_insen, Ca2+ insensitive EF hand	2526.32	0.00057881	0.000778442	-7.82399	-6.92854	-7.93783	-7.75699	-6.67754	-7.34052	-0.681133	0.533178	0.801189	0.74355	1.3449
gi|158256058|	2	5	0	1	5	5	72600	unnamed protein product flavoprotein subu...PRK06175, L-aspartate oxidaseSucc_DH_flav_C, Fumarate reductase flavoprotein C-term	636.842	7.65765e-05	0.000101944	-9.71175	-8.76942	-11.1946	-10.1857	-8.89061	-8.94452	-0.670385	0.53933	0.804554	0.751162	1.33127
gi|189053612|	1	5	0	3	2	2	45700	unnamed protein product .DnaJ_zf, Zinc finger domain of DnaJ and HSP40DnaJ_C, C-terminal substrate binding domain of DnaJ and HSP40DnaJ, DnaJ domain or J-domain. DnaJ/Hsp40 (heat shock protein 4...PTZ00037, DnaJ_C chaperone protein	400.877	0.000108822	0.000111129	-9.75971	-8.30656	-10.7317	-8.87549	-9.2162	-9.27012	-0.669158	0.540035	0.804554	0.979242	1.0212
gi|158261867|	24	23	14	25	19	31	47700	unnamed protein product .PRK05476, S-adenosyl-L-homocysteine hydrolaseSAHH, S-Adenosylhomocysteine Hydrolase, NAD-binding and catalyti...	418.421	0.00084031	0.0009519	-7.00934	-6.89714	-7.40723	-6.93241	-7.20491	-6.77925	-0.666528	0.54155	0.804554	0.882771	1.1328
gi|189067280|	17	35	20	29	33	27	136300	unnamed protein product .HEAT_EZ, HEAT-like repeatARM, Armadillo/beta-catenin-like repeats. An approximately 40 am...TIP120, TATA-binding protein interacting (TIP20)MMS19_C, RNAPII transcription regulator C-terminal	1195.61	0.000353464	0.00039636	-8.39574	-7.53453	-8.11088	-7.83662	-7.71371	-7.96498	-0.665213	0.542308	0.804554	0.891776	1.12136
gi|62988765|	0	1	4	3	3	1	29600	COPS7B, unknown .PCI, PCI domain	259.649	0.000145722	0.000172648	-10.424	-9.17152	-8.10014	-8.44117	-8.44541	-9.34662	-0.662406	0.543929	0.804554	0.84404	1.18478
gi|189067547|	1	1	3	3	1	4	24600	unnamed protein product .PDZ_metalloprotease, PDZ domain of bacterial and plant zinc meta...	215.789	0.000172122	0.000228486	-9.14036	-8.98649	-8.16643	-8.25614	-9.10768	-8.06298	-0.655138	0.548143	0.804554	0.753316	1.32746
gi|189067940|	9	0	24	13	12	8	85600	unnamed protein product .gelsolin_S6_like, Gelsolin sub-domain 6-like domain found in gel...gelsolin_S4_like, Gelsolin sub-domain 4-like domain found in gel...gelsolin_S1_like, Gelsolin sub-domain 1-like domain found in gel...gelsolin_S3_like, Gelsolin sub-domain 3-like domain found in gel...gelsolin_S2_like, Gelsolin sub-domain 2-like domain found in gel...gelsolin_S5_like, Gelsolin sub-domain 5…	750.877	0.000259521	0.000241397	-8.54147	-11.332	-7.46746	-8.15315	-8.23435	-8.67393	-0.653343	0.549187	0.804554	1.07508	0.930164
gi|66737372|	1	0	4	1	4	2	11500	S100A13, protein S100-A13 .S-100A13, S-100A13: S-100A13 domain found in proteins similar to...	100.877	0.000366594	0.000441168	-8.37996	-9.3247	-7.15472	-8.34304	-7.24867	-7.89036	-0.652288	0.549801	0.804554	0.830964	1.20342
gi|20379072|	17	0	9	11	6	11	22800	RAB13, small GTP binding protein RAB13 .COG1100, GTPase SAR1 and related small G proteins [General funct...Rab8_Rab10_Rab13_like, Rab GTPase families 8, 10, 13 (Rab8, Rab10, Rab13)	200	0.000742269	0.000769045	-6.60764	-10.0091	-7.09192	-6.99057	-7.56536	-7.04872	-0.65063	0.550768	0.804554	0.965183	1.03607
gi|189053088|	4	4	9	5	6	14	16600	unnamed protein product .PTZ00160, 60S ribosomal protein L27a	145.614	0.000725132	0.000940126	-7.6484	-7.49453	-6.77456	-7.41081	-7.248	-6.49956	-0.650624	0.550771	0.804554	0.771314	1.29649
gi|189053614|	20	22	39	29	31	39	17200	unnamed protein product .SSB_OBF, SSB_OBF: A subfamily of OB folds similar to the OB fold...Ssb, Single-stranded DNA-binding protein [DNA replication, recom...	150.877	0.0031215	0.00347094	-6.16756	-5.9206	-5.38506	-5.76667	-5.70532	-5.53292	-0.646871	0.552963	0.804554	0.899326	1.11194
gi|6005942|	71	100	73	70	147	105	89300	VCP, transitional endoplasmic reticulum ATPase .CDC48, AAA family ATPase, CDC48 subfamilyCDC48_2, Cell division protein 48 (CDC48) domain 2AAA (2&times;), The AAA+ (ATPases Associated with a wide variety of cellula...CDC48_N, Cell division protein 48 (CDC48), N-terminal domainVps4_C, Vps4 C terminal oligomerization domain	783.333	0.00178671	0.00215895	-6.56538	-6.07105	-6.41116	-6.54254	-5.80857	-6.1976	-0.645978	0.553485	0.804554	0.827585	1.20834
gi|62089138|	1	8	4	4	7	6	58700	prosaposin variant, partial .SapA, Saposin A-type domainSapB_2 (3&times;), Saposin-like type B, region 2SapB (4&times;), Saposin (B) DomainsSapB_1 (3&times;), Saposin-like type B, region 1SAPA, Saposin/surfactant protein-B A-type DOMAIN	514.912	0.000165015	0.000187593	-10.0101	-8.12158	-8.78481	-8.87452	-8.36793	-8.56495	-0.645783	0.553599	0.804554	0.879645	1.13682
gi|189053387|	12	15	3	11	14	12	54500	unnamed protein product .TGR, thioredoxin and glutathione reductase selenoproteinPyr_redox, Pyridine nucleotide-disulphide oxidoreductasePyr_redox_dim, Pyridine nucleotide-disulphide oxidoreductase, di...NAD_binding_8, NAD(P)-binding Rossmann-like domain	478.07	0.000371686	0.000421181	-7.81555	-7.44657	-8.96188	-7.86201	-7.63445	-7.83678	-0.642874	0.555304	0.804554	0.882485	1.13316
gi|158259593|	9	10	0	7	10	5	174900	unnamed protein product .GT8_HUGT1_C_like, The C-terminal domain of HUGT1-like is highly ...UDP-g_GGTase, UDP-glucose:Glycoprotein Glucosyltransferase	1534.21	7.48004e-05	8.05035e-05	-9.256	-9.00205	-12.0738	-9.45547	-9.12324	-9.82377	-0.639987	0.556999	0.804554	0.929157	1.07624
gi|194377154|	15	13	0	13	6	12	33500	unnamed protein product .DltE, Short-chain dehydrogenases of various substrate specificit...17beta-HSD1_like_SDR_c, 17-beta-hydroxysteroid dehydrogenases (17beta-HSDs) ...	293.86	0.00055677	0.000576863	-7.11378	-7.09806	-10.4211	-7.21501	-7.95014	-7.35012	-0.625836	0.56536	0.811152	0.965169	1.03609
gi|38569421|	17	13	3	18	18	8	120800	ACLY, ATP-citrate synthase isoform 1 .ATP-grasp_2, ATP-grasp domainPLN02522, ATP citrate (pro-S)-lyaseCoA_binding, CoA binding domainPLN02235, ATP citrate (pro-S)-lyaseCCL_ACL-C, Citryl-CoA lyase (CCL), the C-terminal portion of the...Ligase_CoA, CoA-ligase	1059.65	0.000180635	0.000226324	-8.27501	-8.38065	-9.75782	-8.18252	-8.18676	-9.01838	-0.618782	0.569559	0.811152	0.798125	1.25294
gi|158256464|	0	13	15	6	12	14	31400	unnamed protein product .MAM33, Mitochondrial glycoprotein	275.439	0.000631816	0.000632136	-10.483	-7.03333	-6.92242	-7.88116	-7.23148	-7.13697	-0.612183	0.573506	0.811152	0.999495	1.00051
gi|189069129|	7	3	8	6	7	9	52100	unnamed protein product .RRM_G3BP1, RNA recognition motif found in ras GTPase-activating ...NTF2, Nuclear transport factor 2 (NTF2) domain plays an importan...COG0724, RNA-binding proteins (RRM domain) [General function pre...	457.018	0.000238902	0.00026776	-8.28134	-8.88961	-8.02955	-8.38752	-8.24866	-8.06618	-0.611101	0.574155	0.811152	0.892225	1.12079
gi|2739355|	7	3	3	12	10	2	123000	pNORF1 .DEXDc, DEAD-like helicases superfamily. A diverse family of prot...UPF1_Zn_bind, RNA helicase (UPF2 interacting domain)COG1112, Superfamily I DNA and RNA helicases and helicase subuni...AAA_12, AAA domain	1078.95	7.41431e-05	0.000125202	-9.14036	-9.74863	-9.77587	-8.59261	-8.77121	-10.2602	-0.610967	0.574235	0.811152	0.592188	1.68865
gi|158257256|	15	3	11	8	14	14	13500	unnamed protein product .Sm_D2, Sm protein D2	118.421	0.00141729	0.00165017	-6.20493	-7.53913	-6.37679	-6.76878	-6.23894	-6.29285	-0.605478	0.577535	0.812599	0.858878	1.16431
gi|189065506|	6	20	6	11	25	9	126900	unnamed protein product .CPSF_A, CPSF A subunit regionMMS1_N, Mono-functional DNA-alkylating methyl methanesulfonate N...SFT1, Pre-mRNA cleavage and polyadenylation specificity factor [...	1113.16	0.000174583	0.000219826	-9.31468	-8.01218	-9.18804	-8.70721	-7.91512	-8.95642	-0.599993	0.580845	0.814753	0.794186	1.25915
gi|189053229|	0	1	4	1	1	9	15400	unnamed protein product .PTZ00071, 40S ribosomal protein S24	135.088	0.000280088	0.000472335	-9.77059	-8.51811	-7.44674	-8.63506	-8.6393	-6.84738	-0.598826	0.581552	0.814753	0.592986	1.68638
gi|158261923|	3	2	2	4	3	2	36000	unnamed protein product .Peptidase_C26, Peptidase C26GATase1_Glutamyl_Hydrolase, Type 1 glutamine amidotransferase (GATase1) domain ...	315.789	0.000150699	0.000174797	-8.67383	-8.85644	-8.88368	-8.3856	-8.64115	-9.03154	-0.595643	0.583479	0.814753	0.862138	1.15991
sp|TRYP_PIG|	75	74	95	90	98	92	24400	Trypsin; EC 3.4.21.4; Flags: Precursor;	214.035	0.00650653	0.00687773	-5.21353	-5.07299	-4.8519	-4.99539	-4.91492	-5.03168	-0.591149	0.586209	0.817327	0.946028	1.05705
gi|158260471|	12	5	10	12	9	11	24600	unnamed protein product .AdoMet_MTases, S-adenosylmethionine-dependent methyltransferases ...	215.789	0.000734829	0.000811377	-7.0201	-7.68721	-7.06782	-6.98317	-7.26185	-7.12471	-0.58899	0.587523	0.817327	0.905656	1.10417
gi|4757900|	93	69	21	67	69	79	48100	CALR, calreticulin precursor .Calreticulin, Calreticulin family	421.93	0.00242517	0.00267766	-5.6784	-5.82116	-7.02168	-5.96731	-5.94235	-5.86183	-0.585073	0.589913	0.817327	0.905704	1.10411
gi|158255136|	4	4	0	3	5	2	100100	unnamed protein product .SAP, SAP domainPSP, proline-rich domain in spliceosome associated proteinsDUF382, Domain of unknown function (DUF382)	878.07	6.04218e-05	6.889e-05	-9.44517	-9.2913	-11.5158	-9.65956	-9.21182	-10.0542	-0.58389	0.590636	0.817327	0.877076	1.14015
gi|56554583|	1	3	7	3	5	6	15900	Chain F, Divalent Cation Tolerant Protein Cuta From Homo Sapiens O60888.CutA1, CutA1 divalent ion tolerance protein	139.474	0.000519724	0.000578101	-8.70393	-7.70276	-6.96786	-7.81971	-7.37197	-7.25882	-0.579563	0.593285	0.819763	0.89902	1.11232
gi|194389952|	1	2	7	3	4	5	33600	unnamed protein product .YjeF_N, YjeF-related protein N-terminus	294.737	0.000225589	0.000238454	-9.45214	-8.78744	-7.71607	-8.56792	-8.32085	-8.17409	-0.573839	0.5968	0.823388	0.946049	1.05703
gi|158256784|	4	8	11	6	11	14	26500	unnamed protein product .ADK, Adenylate kinase (ADK) catalyzes the reversible phosphoryl ...ADK, Adenylate kinase	232.456	0.000607674	0.000726162	-8.11615	-7.32629	-7.05124	-7.7115	-7.14519	-6.9673	-0.572177	0.597824	0.823569	0.836829	1.19499
gi|189054543|	34	46	39	42	51	46	97100	unnamed protein product .ARM, Armadillo/beta-catenin-like repeats. An approximately 40 am...IBN_N, Importin-beta N-terminal domainKAP95, Karyopherin (importin) beta [Intracellular trafficking an...	851.754	0.000806484	0.000862429	-7.37786	-6.9255	-7.11589	-7.13239	-6.94456	-7.1006	-0.561822	0.604226	0.827732	0.935131	1.06937
gi|158260245|:reversed	0	0	6	4	1	1	28500		250	0.00017405	0.000158147	-10.3861	-10.2323	-7.69455	-8.15198	-9.25484	-9.30875	-0.560128	0.605277	0.827732	1.10056	0.908627
gi|189053630|	25	23	29	24	32	34	26700	unnamed protein product .40S_S3_KH, K homology RNA-binding (KH) domain of the eukaryotic ...Ribosomal_S3_C, Ribosomal protein S3, C-terminal domainPTZ00084, 40S ribosomal protein S3	234.211	0.00189703	0.00203724	-6.38906	-6.31687	-6.11672	-6.39215	-6.11382	-6.10801	-0.560044	0.605329	0.827732	0.931178	1.07391
gi|189065418|	33	24	32	41	34	29	32800	unnamed protein product .PTZ00169, ADP/ATP transporter on adenylate translocaseMito_carr (3&times;), Mitochondrial carrier protein	287.719	0.00176894	0.0019231	-6.32196	-6.48096	-6.22564	-6.07089	-6.25987	-6.47035	-0.552211	0.610206	0.829519	0.919836	1.08715
gi|189065411|	140	147	116	168	134	159	36600	unnamed protein product .PLN02602, lactate dehydrogenaseLDH_1, A subgroup of L-lactate dehydrogenases	321.053	0.00712462	0.00752819	-4.99792	-4.79543	-5.0586	-4.77927	-5.00888	-4.89231	-0.551993	0.610342	0.829519	0.946392	1.05664
gi|189067589|	53	66	24	57	46	68	54500	unnamed protein product .Fascin (4&times;), Fascin-like domain	478.07	0.00170906	0.0018801	-6.3616	-5.99021	-7.01597	-6.25257	-6.46915	-6.13567	-0.539479	0.618185	0.836572	0.909025	1.10008
gi|20147705|	15	3	5	9	12	6	40400	GNAI2, guanine nucleotide binding protein alpha i2 .G_alpha, G protein alpha subunitG-alpha, Alpha subunit of G proteins (guanine nucleotide binding...	354.386	0.000374773	0.000422828	-7.30107	-8.63527	-8.21053	-7.75369	-7.4835	-8.19134	-0.538937	0.618526	0.836572	0.886348	1.12823
gi|158256968|	7	16	2	4	18	14	135500	unnamed protein product .CPSF_A, CPSF A subunit regionMMS1_N, Mono-functional DNA-alkylating methyl methanesulfonate N...	1188.6	0.000127998	0.000164332	-9.23715	-8.29482	-10.2091	-9.71105	-8.3016	-8.59913	-0.538113	0.619045	0.836572	0.778902	1.28386
gi|158255742|	10	17	2	8	11	15	73200	unnamed protein product .DEADc, DEAD-box helicases. A diverse family of proteins involved...PTZ00110, helicaseHELICc, Helicase superfamily c-terminal domain	642.105	0.000270307	0.000287349	-8.2849	-7.6202	-9.59335	-8.45928	-8.16125	-7.91666	-0.53361	0.621884	0.83783	0.940693	1.06305
gi|62822169|	12	8	21	33	12	13	36600	NEDD5, unknown, partial .CDC_Septin, CDC/Septin GTPase family	321.053	0.000749948	0.000975421	-7.4174	-7.64919	-6.74844	-6.39466	-7.38472	-7.36167	-0.530485	0.62386	0.83783	0.768846	1.30065
gi|209862831|	184	182	179	196	181	243	38600	ANXA2, annexin A2 isoform 2 .Annexin (4&times;), Annexin	338.596	0.00912991	0.00956608	-4.77868	-4.63571	-4.67952	-4.67875	-4.76239	-4.52244	-0.52945	0.624515	0.83783	0.954404	1.04777
gi|41406084|	7	1	2	4	4	3	22100		193.86	0.000320657	0.00033812	-7.42375	-8.87932	-8.39573	-7.89766	-7.9019	-8.20712	-0.524236	0.627822	0.838524	0.948355	1.05446
gi|8100574|	54	100	49	60	111	81	278000	FLNB, filamin .CH (2&times;), Calponin homology domainIG_FLMN (23&times;), Filamin-type immunoglobulin domains	2438.6	0.000480633	0.000543624	-7.9725	-7.20667	-7.9421	-7.83113	-7.22399	-7.59133	-0.516631	0.632663	0.838796	0.884128	1.13106
gi|62089424|	6	5	7	7	8	6	51700	Hypothetical protein DKFZp686J01190 variant, partial .DEXDc, DEAD-like helicases superfamilyDEADc, DEAD-box helicases. A diverse family of proteins involved...HELICc, Helicase superfamily c-terminal domain	453.509	0.000242993	0.00026001	-8.41673	-8.42992	-8.147	-8.23671	-8.11579	-8.43796	-0.51454	0.633999	0.838796	0.934552	1.07003
gi|325652048|	0	2	9	5	2	4	10800	TCEB1, transcription elongation factor B polypeptide 1 isoform b .Skp1, Found in Skp1 protein family	94.7368	0.000770777	0.000689188	-9.41577	-7.65246	-6.3447	-6.98095	-7.77365	-7.23978	-0.514034	0.634322	0.838796	1.11838	0.894147
sp|NEDD8_HUMAN|	2	0	2	1	1	4	9100	NEDD8; Neddylin; Neural precursor cell expressed developmentally down-regulated protein 8; NEDD-8; Ubiquitin-like protein Nedd8; Flags: Precursor;	79.8246	0.000381456	0.000483964	-7.63506	-9.09063	-7.50843	-8.10896	-8.11321	-7.0685	-0.511204	0.636133	0.839236	0.788189	1.26873
gi|3337383|	2	4	3	8	4	2	105300	A-761H5.1, Translation initiation factor eIF-p110 .eIF-3c_N, Eukaryotic translation initiation factor 3 subunit 8 N...PAM, PCI/PINT associated module	923.684	6.52608e-05	8.86216e-05	-10.0836	-9.34194	-9.6205	-8.8229	-9.46313	-10.1048	-0.509505	0.637221	0.839236	0.736398	1.35796
gi|189053226|	4	1	4	5	3	3	17600	unnamed protein product .Keratin_assoc, Keratinocyte-associated protein 2	154.386	0.000378326	0.000424717	-7.7069	-8.65164	-7.58027	-7.46931	-7.92553	-7.97944	-0.502155	0.641942	0.842316	0.890771	1.12262
gi|189053452|	3	2	5	8	5	2	53800	unnamed protein product .ALDH_F9_TMBADH, NAD+-dependent 4-trimethylaminobutyraldehyde deh...	471.93	0.000137946	0.000184714	-9.07559	-9.25819	-8.49697	-8.15136	-8.59092	-9.43329	-0.495711	0.646098	0.84458	0.746808	1.33903
gi|8922652|	5	4	0	5	3	2	44600		391.228	0.000148756	0.000154732	-8.43606	-8.48286	-10.7073	-8.39914	-8.85537	-9.24575	-0.47611	0.658834	0.851125	0.961378	1.04017
gi|303227926|	13	14	12	9	27	18	94600	MATR3, matrin-3 isoform a .DNA_pol_phi, DNA polymerase phiRRM1_MATR3, RNA recognition motif 1 in vertebrate matrin-3RRM2_MATR3, RNA recognition motif 2 in vertebrate matrin-3ZnF_U1 (2&times;), U1-like zinc finger	829.825	0.000276409	0.000349435	-8.29005	-8.06472	-8.24038	-8.60452	-7.54587	-7.99619	-0.475775	0.659054	0.851125	0.791018	1.26419
gi|158259069|	2	4	3	1	8	9	144600	unnamed protein product .PurL_repeat2, PurL subunit of the formylglycinamide ribonucleoti...GATase1_FGAR_AT, Type 1 glutamine amidotransferase (GATase1)-like ...PurL_repeat1, PurL subunit of the formylglycinamide ribonucleoti...FGAM_synt, phosphoribosylformylglycinamidine synthase, single ch...	1268.42	4.75239e-05	7.9629e-05	-10.4008	-9.6591	-9.93766	-10.8747	-9.1443	-9.08699	-0.475364	0.659322	0.851125	0.596816	1.67556
gi|189054910|	2	2	1	3	1	3	50300	unnamed protein product .ATP-grasp_2, ATP-grasp domainsucC, succinyl-CoA synthetase subunit betaLigase_CoA, CoA-ligase	441.228	8.2971e-05	0.000100334	-9.34479	-9.19092	-9.72899	-8.9714	-9.82294	-9.02955	-0.46226	0.66792	0.857988	0.82695	1.20926
gi|12025678|	46	88	72	72	118	66	104800	ACTN4, alpha-actinin-4 .CH (2&times;), Calponin homology domainEFh, EF-hand, calcium binding motifEF-hand_7, EF-hand domain pairSPEC (3&times;), Spectrin repeats, found in several proteins involved in cy...EFhand_Ca_insen, Ca2+ insensitive EF hand	919.298	0.00129795	0.00147002	-7.15568	-6.35826	-6.58491	-6.67462	-6.18754	-6.81916	-0.456912	0.671447	0.859564	0.882944	1.13257
gi|62089240|	7	3	1	7	2	5	56700	copine I variant, partial .C2A_Copine, C2 domain first repeat in CopineC2B_Copine, C2 domain second repeat in CopinevWA_copine_like, VWA Copine: Copines are phospholipid-binding pr...	497.368	0.000137367	0.000162855	-8.36595	-8.97422	-9.84876	-8.32903	-9.43188	-8.69733	-0.452065	0.674652	0.859924	0.843492	1.18555
gi|158255686|	2	1	4	9	3	1	17700	unnamed protein product .NAC, NAC domain	155.263	0.00030994	0.00049494	-8.30035	-8.65731	-7.58593	-6.92843	-7.9312	-8.83241	-0.447926	0.677396	0.860181	0.626218	1.59689
gi|189067504|	5	0	4	2	7	2	21900	unnamed protein product .EFh (2&times;), EF-hand, calcium binding motifEF-hand_7, EF-hand domain pair	192.105	0.000299589	0.000342424	-7.72482	-9.96884	-7.79886	-8.47635	-7.38198	-8.5345	-0.443807	0.680132	0.86231	0.874907	1.14298
gi|158255130|	13	3	6	13	6	7	47500	unnamed protein product .Aminotran_1_2, Aminotransferase class I and IIAAT_like, Aspartate aminotransferase family. This family belongs...	416.667	0.000308078	0.000346421	-7.60112	-8.79717	-8.20537	-7.5642	-8.29932	-8.21013	-0.424929	0.69275	0.871439	0.889315	1.12446
gi|158260213|	4	0	1	1	1	4	10100	unnamed protein product .SRP9-21, Signal recognition particle 9 kDa protein (SRP9)	88.5965	0.0003939	0.000436047	-7.15154	-9.19489	-8.12352	-8.21323	-8.21747	-7.17277	-0.421752	0.694885	0.871439	0.903343	1.107
gi|189065322|	24	22	22	29	34	19	38400	unnamed protein product WD40, WD40 domain, found in a number of eukaryotic proteins that...	336.842	0.00116465	0.00130307	-6.79246	-6.72375	-6.75099	-6.56982	-6.4175	-7.04195	-0.419552	0.696366	0.872111	0.893774	1.11885
gi|343168772|	4	6	4	11	11	2	61900		542.982	0.000162805	0.000248744	-8.96452	-8.44292	-8.83789	-7.98933	-7.99357	-9.57354	-0.417319	0.69787	0.872811	0.654507	1.52787
gi|189055163|	48	61	56	55	58	78	11400	unnamed protein product .H4, Histone H4, one of the four histones, along with H2A, H2B an...	100	0.00948136	0.0100226	-4.89513	-4.50378	-4.61582	-4.72339	-4.67498	-4.43482	-0.412695	0.700992	0.875529	0.945994	1.05709
gi|169790923|	4	5	0	1	5	5	140400	MTR, methionine synthase .methionine_synthase_B12_BD, B12 binding domain of methionine synthase. This ...metH, B12-dependent methionine synthaseMeTr, MeTr subgroup of pterin binding enzymes. This family inclu...Met_synt_B12, Vitamin B12 dependent methionine synthase, activat...MetH, Methionine synthase I (cobalamin-dependent), methyltransfe...	1231.58	4.7949e-05	5.27146e-05	-9.7835	-9.42895	-11.8541	-10.8452	-9.55014	-9.60405	-0.410524	0.70246	0.876176	0.909595	1.09939
gi|189054052|	0	2	5	4	3	1	38300	unnamed protein product .SRPBCC_Aha1, Putative hydrophobic ligand-binding SRPBCC domain o...COG5580, Activator of HSP90 ATPase [Posttranslational modificati...Aha1_N, Activator of Hsp90 ATPase, N-terminal	335.965	0.000147849	0.000149314	-10.6817	-8.91837	-8.15715	-8.44753	-8.70308	-9.60429	-0.404531	0.70652	0.876503	0.99019	1.00991
gi|189053751|	1	1	3	4	1	2	52200	unnamed protein product .eIF3_N, eIF3 subunit 6 N terminal domainPCI, PCI domain	457.895	8.11152e-05	9.73401e-05	-9.8927	-9.73882	-8.91877	-8.75716	-9.86001	-9.4031	-0.401398	0.708647	0.877512	0.833317	1.20002
gi|62988852|	13	15	16	12	24	18	20900	RTN4, unknown, partial .Reticulon, Reticulon	183.333	0.00141119	0.00158202	-6.78014	-6.48812	-6.45284	-6.82018	-6.15147	-6.48629	-0.400287	0.709402	0.877512	0.892017	1.12105
gi|189066618|	5	6	11	4	10	19	29200	unnamed protein product .Ribosomal_L7_archeal_euk, Ribosomal protein L7, which is found in archaea and ...Ribosomal_L30_N, Ribosomal L30 N-terminal domainL7, 60S ribosomal protein L7, eukaryotic	256.14	0.000524726	0.000694887	-8.0125	-7.69157	-7.14827	-8.17625	-7.33319	-6.76806	-0.39867	0.710502	0.877512	0.755124	1.32429
gi|41472053|	24	26	28	30	26	32	33200	MDH2, unknown, partial .MDH_glyoxysomal_mitochondrial, Glyoxysomal and mitochondrial malate ...MDH_euk_gproteo, malate dehydrogenase, NAD-dependent	291.228	0.00154971	0.00160427	-6.64696	-6.41461	-6.36909	-6.39098	-6.5358	-6.38562	-0.397737	0.711137	0.877512	0.965992	1.0352
gi|189054542|	5	6	2	5	4	6	68300	unnamed protein product .ATP-synt_ab_N, ATP synthase alpha/beta family, beta-barrel domainV-ATPase_V1_A, V-type (H+)-ATPase V1, A subunitV_A-ATPase_A, V/A-type ATP synthase catalytic subunit A. These A...ATP-synt_ab_C, ATP synthase alpha/beta chain, C terminal domain	599.123	0.000136648	0.000143525	-8.86224	-8.54131	-9.52407	-8.82532	-9.03023	-8.71642	-0.390489	0.716079	0.881364	0.952085	1.05033
gi|158261193|	75	91	77	91	98	85	18000	unnamed protein product .cyclophilin_ABH_like, cyclophilin_ABH_like: Cyclophilin A, B and H-like ...	157.895	0.00880034	0.00913373	-4.90932	-4.56324	-4.75654	-4.68019	-4.61071	-4.80616	-0.381652	0.722127	0.886334	0.963499	1.03788
gi|397138164|	218	189	122	212	177	203	38900	LOC100996820, PREDICTED: POTE ankyrin domain family member I-like .	341.228	0.00871992	0.00909003	-4.61729	-4.60581	-5.06933	-4.60821	-4.79242	-4.70964	-0.37562	0.72627	0.889055	0.959284	1.04244
gi|5630086|	0	6	0	1	2	1	84700	WUGSC:H_DJ0747G18.4, lysyl hydroxylase 3 .P4Hc, Prolyl 4-hydroxylase alpha subunit homologues	742.982	5.98664e-05	3.88183e-05	-11.4753	-8.75652	-11.3487	-10.3398	-9.83322	-10.398	-0.37231	0.728548	0.889459	1.54222	0.648416
gi|158255646|	48	52	37	43	63	51	17100	unnamed protein product .NDPk_I, Nucleoside diphosphate kinase Group I (NDPk_I)-like: NDP...NDK, Nucleoside diphosphate kinase	150	0.00522162	0.00552569	-5.30059	-5.06747	-5.43118	-5.37247	-4.99844	-5.2618	-0.361186	0.736229	0.891954	0.944971	1.05823
gi|4504619|	2	4	4	4	5	3	29100	IGFBP7, insulin-like growth factor-binding protein 7 isoform 1 precursor .IGFBP, Insulin-like growth factor binding proteinI-set, Immunoglobulin I-set domainKAZAL_FS, Kazal type serine protease inhibitors and follistatin-...Ig, Immunoglobulin domain	255.263	0.000259017	0.000277602	-8.79753	-8.05587	-8.08311	-8.17282	-7.97639	-8.48228	-0.358041	0.738408	0.891963	0.933053	1.07175
gi|189054143|	2	2	7	9	4	2	36400	unnamed protein product .Annexin (4&times;), Annexin	319.298	0.000224343	0.000273082	-9.02136	-8.86748	-7.79611	-7.64943	-8.40089	-9.04259	-0.354131	0.74112	0.891963	0.821522	1.21725
gi|62087324|	6	2	0	6	1	2	32400		284.211	0.000180653	0.000194378	-7.94944	-8.75107	-10.3878	-7.91251	-9.38309	-8.92618	-0.344321	0.747945	0.8954	0.929392	1.07597
gi|47678593|	6	0	8	6	5	2	14200	NHP2L1, NHP2L1 .RPL8A, Ribosomal protein HS6-type (S12/L30/L7a) [Translation, ri...	124.561	0.000690779	0.00061415	-7.12452	-9.5356	-6.72962	-7.0876	-7.25889	-8.10126	-0.337189	0.752925	0.899624	1.12477	0.889068
gi|82659109|	0	6	5	4	9	1	573500	UBR4, E3 ubiquitin-protein ligase UBR4 .DZR, Double zinc ribbonZnF_UBR1, Putative zinc finger in N-recognin, a recognition comp...E3_UbLigase_R4, E3 ubiquitin-protein ligase UBR4	5030.7	1.46432e-05	1.63092e-05	-13.388	-10.6692	-10.8635	-11.1538	-10.4109	-12.3106	-0.336477	0.753423	0.899624	0.897849	1.11377
gi|158255672|	5	2	3	6	3	3	18000	unnamed protein product .UBCc, Ubiquitin-conjugating enzyme E2, catalytic (UBCc) domain. ...	157.895	0.000403511	0.000449076	-7.5287	-8.16329	-7.85406	-7.32472	-7.94801	-8.00192	-0.318287	0.766192	0.910161	0.898537	1.11292
gi|46276893|	7	4	10	10	10	5	17900	TCEB2, transcription elongation factor B polypeptide 2 isoform b .ElonginB, Ubiquitin-like domain of Elongin B	157.018	0.000807906	0.000888553	-7.21298	-7.56993	-6.74987	-6.83958	-6.84382	-7.54436	-0.304875	0.775666	0.910828	0.909238	1.09982
gi|158260079|	9	8	11	14	13	7	105600	unnamed protein product .Adaptin_N, Adaptin N terminal regionARM, Armadillo/beta-catenin-like repeats. An approximately 40 am...B2-adapt-app_C, Beta2-adaptin appendage, C-terminal sub-domainAlpha_adaptinC2, Adaptin C-terminal domain	926.316	0.000180254	0.00020174	-8.75145	-8.7088	-8.43376	-8.29166	-8.36737	-9.00906	-0.303165	0.776877	0.910828	0.893496	1.1192
gi|17064083|	2	6	6	6	6	4	25000	p25 .EMP24_GP25L, emp24/gp25L/p24 family/GOLD	219.298	0.000409437	0.000418986	-8.64566	-7.53628	-7.56352	-7.65323	-7.65747	-8.07911	-0.302666	0.777231	0.910828	0.977208	1.02332
gi|158261381|	7	5	6	16	4	6	64000	unnamed protein product .VASP_tetra, VASP tetramerization domainEVH1_Ena_VASP-like, Enabled/VASP family EVH1 domain	561.404	0.000195056	0.000257727	-8.48706	-8.64334	-8.50353	-7.66168	-8.9652	-8.65139	-0.299444	0.779516	0.910828	0.756831	1.3213
gi|158261889|	12	10	12	15	14	10	59100	unnamed protein product .LDLa, Low-density lipoprotein receptor domain class AApoLp-III_like, Apolipophorin-III and similar insect proteinsPRKCSH, Glucosidase II beta subunit-like proteinPRKCSH-like, Glucosidase II beta subunit-like	518.421	0.00038624	0.000410149	-7.89658	-7.91706	-7.76995	-7.64455	-7.71548	-8.09216	-0.299351	0.779582	0.910828	0.941706	1.0619
gi|47678393|	7	1	4	2	5	7	12700	DDT, DDT .MIF, Macrophage migration inhibitory factor (MIF)	111.404	0.000662788	0.000721058	-6.86978	-8.32534	-7.25397	-7.93147	-7.14725	-6.89101	-0.297943	0.780581	0.910843	0.919189	1.08792
gi|320461711|	136	103	71	105	112	123	22100	PRDX1, peroxiredoxin-1 .PTZ00253, tryparedoxin peroxidasePRX_Typ2cys, Peroxiredoxin (PRX) family, Typical 2-Cys PRX subfa...	193.86	0.00897662	0.00919529	-4.52233	-4.64521	-5.04233	-4.74302	-4.68302	-4.64364	-0.292873	0.784184	0.913072	0.976219	1.02436
gi|189053109|	10	9	5	4	8	29	29900	unnamed protein product .Ribosomal_S3Ae, Ribosomal S3Ae family	262.281	0.000545561	0.000830065	-7.38956	-7.33577	-7.90956	-8.19994	-7.56819	-6.37778	-0.288669	0.787177	0.913072	0.657251	1.52149
gi|158257150|	8	9	14	10	6	33	47700	unnamed protein product .Ribos_L4_asso_C, 60S ribosomal protein L4 C-terminal domainPTZ00428, 60S ribosomal protein L4Ribosomal_L4, Ribosomal protein L4/L1 family	418.421	0.000442949	0.000619568	-8.06794	-7.80285	-7.40723	-7.81971	-8.30353	-6.71769	-0.287375	0.788098	0.913072	0.714932	1.39873
gi|158255582|	6	10	4	9	3	18	11200	unnamed protein product .S-100A10, S-100A10: A subgroup of the S-100A10 domain found in p...	98.2456	0.0012487	0.0016534	-6.88719	-6.25375	-7.12828	-6.47078	-7.47355	-5.86245	-0.286921	0.788422	0.913072	0.755234	1.32409
gi|158259931|	67	73	40	61	53	94	67800	unnamed protein product .Transketolase_C, Transketolase, C-terminal domainPRK05899, transketolaseTPP_PYR_DXS_TK_like, Pyrimidine (PYR) binding domain of 1-deoxy-...TPP_TK, Thiamine pyrophosphate (TPP) family, Transketolase (TK) ...	594.737	0.0017225	0.00182984	-6.34751	-6.10848	-6.73171	-6.40368	-6.54728	-6.03227	-0.286755	0.78854	0.913072	0.941343	1.06231
gi|158257918|	14	6	7	17	17	4	21100	unnamed protein product .Armet, Degradation arginine-rich protein for mis-folding	185.088	0.000850089	0.00112938	-6.7182	-7.36668	-7.25082	-6.49323	-6.49747	-7.9095	-0.283566	0.790815	0.913072	0.752704	1.32854
gi|47678583|	43	89	29	36	79	70	226400	MYH9, MYH9 .Myosin_N, Myosin N-terminal SH3-like domainMyosin_tail_1, Myosin tailLebercilin, Ciliary protein causing Leber congenital amaurosis d...RRF, Ribosome recycling factor (RRF). Ribosome recycling factor ...GluZincin, Peptidase Gluzincin family (thermolysin-like proteina...ApoLp-III_like, Apolipophorin-III and similar insect proteinsMYSc_type_II, Myosin motor domain, type II myosins. Myos…	1985.96	0.000469682	0.000489527	-7.99262	-7.11727	-8.25436	-8.13115	-7.35694	-7.531	-0.276461	0.795891	0.915969	0.959461	1.04225
gi|189053313|	7	6	1	7	5	3	12300	unnamed protein product .ER, Enhancer of rudimentary	107.895	0.000800014	0.000805142	-6.83778	-6.827	-8.32058	-6.80085	-7.11525	-7.62114	-0.271281	0.7996	0.919092	0.993631	1.00641
gi|189053181|	5	1	7	4	3	7	12700	unnamed protein product .eIF1_SUI1, Eukaryotic initiation factor 1	111.404	0.00072765	0.000721463	-7.17993	-8.32534	-6.74315	-7.34368	-7.59924	-6.89101	-0.268177	0.801825	0.91977	1.00857	0.991498
gi|15277249|	3	0	3	3	2	1	10800	SMRNP, small nuclear ribonuclear protein D homolog .LSm2, Like-Sm protein 2	94.7368	0.000437313	0.000417093	-7.46986	-9.2619	-7.34323	-7.43294	-7.77365	-8.33839	-0.262338	0.806017	0.91977	1.04848	0.953763
gi|189053167|	8	4	8	11	10	4	19600	unnamed protein product .Cyt_c_Oxidase_IV, Cytochrome c oxidase subunit IV. Cytochrome c ...	171.93	0.000699843	0.000813238	-7.17854	-7.66066	-7.05191	-6.83934	-6.93455	-7.83576	-0.255184	0.811165	0.920692	0.860564	1.16203
gi|158255556|	3	1	4	4	3	2	22900	unnamed protein product .SH2_CRK_like, Src homology 2 domain found in cancer-related sign...SH3_CRK_N, N-terminal Src Homology 3 domain of Ct10 Regulator of...	200.877	0.000265163	0.00027479	-8.22145	-8.91488	-7.84351	-7.93321	-8.18877	-8.57915	-0.254074	0.811964	0.920692	0.964966	1.03631
gi|30172702|	614	522	394	598	469	627	41700	ACTB, unknown .NBD_sugar-kinase_HSP70_actin, Nucleotide-Binding Domain of the sugar ...Actin, Actin	365.789	0.0235033	0.0241889	-3.65277	-3.66108	-3.96933	-3.64223	-3.88923	-3.65306	-0.249711	0.81511	0.923125	0.971659	1.02917
gi|189053107|	7	1	6	2	4	13	16100	unnamed protein product .Ribosomal_S19e, Ribosomal protein S19e	141.228	0.000605484	0.000745064	-7.107	-8.56256	-7.12346	-8.16868	-7.58514	-6.54044	-0.24523	0.818346	0.925653	0.81266	1.23053
gi|189065392|	23	25	17	27	32	17	110300	unnamed protein product .CSE1, CAS/CSE protein involved in chromosome segregation [Cell d...Cse1, Cse1CAS_CSE1, CAS/CSE protein, C-terminusIBN_N, Importin-beta N-terminal domain	967.544	0.000388581	0.00042123	-7.88928	-7.65373	-8.05745	-7.69517	-7.53236	-8.20531	-0.238684	0.82308	0.927787	0.922491	1.08402
gi|189065168|	16	5	25	15	16	15	15500	unnamed protein product .Ribosomal_S17e, Ribosomal S17	135.965	0.00196152	0.00182718	-6.28056	-7.2253	-5.71861	-6.30616	-6.24788	-6.36431	-0.231451	0.828322	0.930099	1.07353	0.931509
gi|15277213|	12	19	12	21	13	15	49000	BAT1, putative ATP-dependent RNA helicase .DEADc, DEAD-box helicases. A diverse family of proteins involved...PTZ00424, helicase 45HELICc, Helicase superfamily c-terminal domain	429.825	0.000591452	0.000615388	-7.70917	-7.11061	-7.58254	-7.12992	-7.59953	-7.51529	-0.225911	0.832344	0.933102	0.961104	1.04047
gi|189055088|	6	5	3	3	8	6	82100	unnamed protein product .ThrRS_core, Threonyl-tRNA synthetase (ThrRS) class II core catal...TGS_ThrRS_N, TGS _ThrRS_N: ThrRS (threonyl-tRNA Synthetase) is ...ThrRS_anticodon, ThrRS Threonyl-anticodon binding domain. ThrRS ...tRNA_SAD, Threonyl and Alanyl tRNA synthetase second additional ...PLN02908, threonyl-tRNA synthetase	720.175	0.000120596	0.000134094	-8.87921	-8.8924	-9.37162	-9.46133	-8.57827	-8.90044	-0.222331	0.834947	0.933102	0.899341	1.11193
gi|189054678|	14	17	23	18	17	26	28800	unnamed protein product .GST_N_CLIC, GST_N family, Chloride Intracellular Channel (CLIC) ...O-ClC, intracellular chloride channel proteinGST_C_CLIC4, C-terminal, alpha helical domain of Chloride Intrac...	252.632	0.00125368	0.00128701	-7.02931	-6.68738	-6.41982	-6.74876	-6.80857	-6.44754	-0.21017	0.843807	0.937578	0.974104	1.02658
gi|189069460|	1	4	3	8	3	1	102800	unnamed protein product .DBC1, DBC1S1-like, S1-like	901.754	6.11446e-05	7.93006e-05	-10.5704	-9.31791	-9.59647	-8.79887	-9.69042	-10.5916	-0.209734	0.844125	0.937578	0.771048	1.29694
gi|189053748|	9	8	20	16	16	9	47300	unnamed protein product .AAA, The AAA+ (ATPases Associated with a wide variety of cellula...PTZ00454, 26S protease regulatory subunit 6B-like protein	414.912	0.000529044	0.00053881	-7.9483	-7.90565	-7.05253	-7.35931	-7.36355	-7.96953	-0.200895	0.850582	0.943615	0.981875	1.01846
gi|30172727|	1	3	5	2	3	5	16900	CGI-135, unknown .Fis1, Mitochondria Fission Protein Fis1, cytosolic domain	148.246	0.000410221	0.000402245	-8.76493	-7.76376	-7.33901	-8.21718	-7.88495	-7.48687	-0.196624	0.853708	0.944811	1.01983	0.980557
gi|189053173|	12	10	13	6	12	36	24200	unnamed protein product .Ribosomal_S8e_like, Eukaryotic/archaeal ribosomal protein S8e and ...PTZ00148, 40S ribosomal protein S8	212.281	0.000970752	0.00134201	-7.0037	-7.02418	-6.80011	-7.62071	-6.97102	-5.95335	-0.192284	0.856887	0.946224	0.723359	1.38244
gi|158256706|	3	3	3	7	6	1	85200	unnamed protein product .TPR_12, Tetratricopeptide repeatTPR, Tetratricopeptide repeat domain	747.368	7.95121e-05	0.000109872	-9.53532	-9.38145	-9.40869	-8.73625	-8.8836	-10.4038	-0.18797	0.86005	0.948419	0.723682	1.38182
gi|62988683|	29	30	34	31	32	40	48100	P5, unknown .P5_C, P5 family, C-terminal redox inactive TRX-like domainER_PDI_fam, protein disulfide isomerase, eukaryoticPDI_a_P5 (2&times;), PDIa family, P5 subfamily	421.93	0.00127047	0.00129099	-6.83197	-6.64476	-6.54877	-6.72945	-6.70244	-6.53629	-0.185938	0.861542	0.948599	0.98411	1.01615
gi|4504347|	9	10	12	9	14	12	15200	HBA1, hemoglobin subunit alpha .globin, Globins are heme proteins, which bind and transport oxyg...	133.333	0.00138605	0.00143011	-6.81308	-6.55913	-6.41201	-6.77616	-6.35754	-6.55987	-0.179517	0.866259	0.949593	0.969188	1.03179
gi|158261055|	19	30	25	21	49	21	157800	unnamed protein product .PPR_2 (3&times;), PPR repeat family	1384.21	0.000312154	0.000351113	-8.43399	-7.83281	-8.0391	-8.29943	-7.46975	-8.35758	-0.177371	0.867836	0.949781	0.889042	1.12481
gi|9956065|	2	1	6	2	2	6	13700	similar to Homo sapiens mRNA for beta 2-microglobulin with GenBank Accession Number AB021288 .IgC_beta2m, Class I major histocompatibility complex (MHC) beta2...	120.175	0.000497579	0.000493879	-8.04418	-8.40114	-6.96204	-8.00726	-8.0115	-7.1099	-0.176484	0.868489	0.949781	1.00749	0.992565
gi|189055102|	67	84	45	94	75	52	51600	unnamed protein product .CAP_N, Adenylate cyclase associated (CAP) N terminalCAP_C, Adenylate cyclase associated (CAP) C terminalCARP (2&times;), Domain in CAPs (cyclase-associated proteins) and X-linked ...	452.632	0.00247355	0.00258446	-6.07447	-5.69598	-6.34226	-5.70108	-5.92979	-6.34702	-0.168781	0.87416	0.952597	0.957084	1.04484
gi|158256194|	3	5	2	4	6	2	106400	unnamed protein product .VIT, Vault protein Inter-alpha-Trypsin domainITI_HC_C, Inter-alpha-trypsin inhibitor heavy chain C-terminusvWA_interalpha_trypsin_inhibitor, vWA_interalpha trypsin inhibitor (ITI): ITI is a ...	933.333	7.0269e-05	7.62219e-05	-9.75752	-9.15166	-9.96736	-9.46928	-9.1058	-10.1152	-0.161957	0.879191	0.954499	0.921901	1.08471
gi|62702176|	9	2	16	3	14	13	27400	SFRS7, unknown .COG0724, RNA-binding proteins (RRM domain) [General function pre...RRM_SRSF7, RNA recognition motif in vertebrate serine/arginine-r...	240.351	0.000666391	0.00068108	-7.40233	-8.58346	-6.72363	-8.36394	-6.94679	-7.07216	-0.153866	0.885166	0.956163	0.978433	1.02204
gi|10281742|	6	4	9	1	12	27	24100	similar to Homo sapiens ribosomal protein L10 encoded by GenBank Accession Number L25899 .Ribosomal_L15e, Ribosomal L15	211.404	0.000548124	0.00100701	-7.65349	-7.86734	-7.14737	-9.0829	-6.96688	-6.23233	-0.146118	0.890896	0.959507	0.544306	1.8372
gi|5032057|	5	11	11	11	5	17	11700	S100A11, protein S100-A11 .S-100A11, S-100A11: S-100A11 domain found in proteins similar to...	102.632	0.0016018	0.00174122	-7.09792	-6.20645	-6.23369	-6.3234	-7.06524	-5.9617	-0.143113	0.893121	0.960466	0.919929	1.08704
gi|62988842|	57	92	33	50	75	67	268500	SPTBN1, unknown, partial .CH (2&times;), Calponin homology domainPH_beta_spectrin, Beta-spectrin pleckstrin homology (PH) domainSpectrin (3&times;), Spectrin repeatLaminin_I, Laminin Domain ISPEC (8&times;), Spectrin repeats, found in several proteins involved in cy...	2355.26	0.000444161	0.000429053	-7.88414	-7.25485	-8.29775	-7.97703	-7.57912	-7.74503	-0.139294	0.895949	0.960466	1.03521	0.965984
gi|194320090|	6	4	11	6	11	6	30500	Chain A, Crystal Structure A Tp53-Induced Glycolysis And Apoptosis Regulator Protein From Homo Sapiens.HP_PGM_like, Histidine phosphatase domain found in phosphoglycer...	267.544	0.000476743	0.000480376	-7.889	-8.10286	-7.19183	-7.85208	-7.28578	-7.91023	-0.1331	0.900542	0.963152	0.992438	1.00762
gi|158259771|	337	287	306	373	323	318	50100	unnamed protein product .EF1_alpha, Elongation Factor 1-alpha (EF1-alpha) protein familyPTZ00141, elongation factor 1- alphaEF1_alpha_III, Domain III of EF-1. Eukaryotic elongation factor 1 ...EF1_alpha_II, EF1_alpha_II: this family represents the domain II ...	439.474	0.0119447	0.0120957	-4.43553	-4.44201	-4.40525	-4.29726	-4.44522	-4.51471	-0.13109	0.902033	0.963326	0.987514	1.01264
gi|33350932|	61	107	43	75	85	62	532100	DYNC1H1, cytoplasmic dynein 1 heavy chain 1 AAA_9, ATP-binding dynein motor region D5AAA (4&times;), The AAA+ (ATPases Associated with a wide variety of cellula...DHC_N2, Dynein heavy chain, N-terminal region 2DHC_N1, Dynein heavy chain, N-terminal region 1AAA_8, P-loop containing dynein motor region D4Dynein_heavy, Dynein heavy chain and region D6 of dynein motor	4667.54	0.000260316	0.000251075	-8.50087	-7.78855	-8.72052	-8.25885	-8.13871	-8.50597	-0.117693	0.911984	0.963326	1.0368	0.964502
gi|189065156|	13	13	19	17	9	30	22900	unnamed protein product .PTZ00091, 40S ribosomal protein S5	200.877	0.0013154	0.00148066	-6.87153	-6.71765	-6.37717	-6.57509	-7.19024	-6.07772	-0.116312	0.913011	0.963326	0.888384	1.12564
gi|33356154|	0	3	3	1	4	1	17200	UBE2H, ubiquitin-conjugating enzyme E2 H isoform 2 .UBCc, Ubiquitin-conjugating enzyme E2, catalytic (UBCc) domain. ...	150.877	0.000291602	0.000261596	-9.88114	-7.78135	-7.80859	-8.7456	-7.65123	-8.80375	-0.114132	0.914633	0.963326	1.1147	0.8971
gi|189055021|	0	5	3	2	2	2	46700	unnamed protein product .alpha-1-antitrypsin_like, alpha-1-antitrypsin_like. This family contains a ...	409.649	0.000136685	9.57224e-05	-10.88	-8.3282	-8.80743	-9.23361	-9.23785	-9.29176	-0.107407	0.919638	0.963555	1.42793	0.700314
gi|158260131|	5	2	2	5	3	2	25000	unnamed protein product .SAC3_GANP, SAC3/GANP/Nin1/mts3/eIF-3 p25 familyPCI_Csn8, COP9 signalosome, subunit CSN8	219.298	0.00026391	0.000276042	-7.85721	-8.49179	-8.51903	-7.82028	-8.27651	-8.66689	-0.106532	0.920289	0.963555	0.956053	1.04597
gi|37674403|	2	0	10	3	2	2	13500	NDUFA5, unknown .ETC_C1_NDUFA5, ETC complex I subunit conserved region	118.421	0.000651465	0.000376191	-8.02948	-9.48504	-6.46776	-7.65608	-7.9968	-8.05071	-0.105579	0.920999	0.963555	1.73174	0.577454
gi|62822199|	3	5	9	8	5	5	37400	tmp_locus_2, unknown .NBD_sugar-kinase_HSP70_actin, Nucleotide-Binding Domain of the sugar ...BcrAD_BadFG, BadF/BadG/BcrA/BcrD ATPase family	328.07	0.000324458	0.000311753	-8.71199	-8.10613	-7.58683	-7.78776	-8.22732	-8.28123	-0.100381	0.924872	0.963555	1.04075	0.960843
gi|4309884|	0	2	6	1	2	3	10400	WUGSC:H_RG437B22.1, similar to Schizosaccharomyces pombe splicing factor; similar to PID:3395591 .LSm8, Like-Sm protein 8	91.2281	0.000608467	0.000426526	-9.37803	-7.61472	-6.68645	-8.2425	-7.73591	-7.45335	-0.100292	0.924938	0.963555	1.42657	0.700984
gi|189053301|	19	15	34	17	15	54	31300	unnamed protein product .rpsE_arch, ribosomal protein S5(archaeal type)/S2(eukaryote cyto...Ribosomal_S5_C, Ribosomal protein S5, C-terminal domainRibosomal_S5, Ribosomal protein S5, N-terminal domain	274.561	0.00143737	0.00163953	-6.81628	-6.89198	-6.11911	-6.88757	-7.01317	-5.80972	-0.0857743	0.935768	0.971037	0.876695	1.14065
gi|189053142|	8	0	5	5	4	1	14500	unnamed protein product .NTF2, Nuclear transport factor 2 (NTF2) domain plays an importan...	127.193	0.000619678	0.000478127	-6.87716	-9.5565	-7.18585	-7.27556	-7.48047	-8.63299	-0.0812216	0.939167	0.972496	1.29605	0.771573
gi|115298678|	0	0	8	1	1	1	187000	C3, complement C3 precursor .ANATO, Anaphylatoxin homologous domainA2M, Alpha-2-macroglobulin familyA2M_N, MG2 domainNTR_complement_C3, NTR/C345C domain, complement C3 subfamilyMG1, Alpha-2-macroglobulin MG1 domainA2M_N_2, Alpha-2-macroglobulin family N-terminal regionA2M_comp, A-macroglobulin complement componentcomplement_C3_C4_C5, Proteins similar to C3, C4 and C5 of vertebrate ...A2M_recep, A…	1640.35	3.36434e-05	1.4343e-05	-12.2673	-12.1135	-9.30749	-11.1318	-11.136	-11.19	-0.0798525	0.94019	0.972496	2.34563	0.426325
gi|62702297|	7	8	12	10	7	13	46600	IDH1, unknown .PTZ00435, isocitrate dehydrogenase	408.772	0.000397589	0.00040085	-8.16978	-7.89074	-7.53232	-7.79638	-8.13709	-7.60322	-0.0774448	0.941989	0.972496	0.991866	1.0082
gi|62088522|	24	15	10	15	19	17	21500	ribosomal protein L12 variant, partial .PLN03072, 60S ribosomal protein L12Ribosomal_L11, Ribosomal protein L11. Ribosomal protein L11, tog...	188.596	0.00148607	0.00145519	-6.21246	-6.51642	-6.93312	-6.63337	-6.40804	-6.57016	-0.0766339	0.942595	0.972496	1.02122	0.979218
gi|62089272|	20	17	26	25	26	18	100500	proteasome 26S non-ATPase subunit 2 variant, partial .RPN1, 26S proteasome regulatory complex component [Posttranslati...PC_rep (2&times;), Proteasome/cyclosome repeat	881.579	0.00041413	0.000419745	-7.93281	-7.93716	-7.54946	-7.67763	-7.64341	-8.05669	-0.0753189	0.943578	0.972496	0.986623	1.01356
gi|380765197|	23	49	30	28	32	51	28200	Chain A, Crystal Structure Of A Tyrosine 3-MonooxygenaseTRYPTOPHAN 5- Monooxygenase Activation Protein, Gamma Polypeptide (Ywhag) From Homo Sapiens At 2.25 A Resolution.Domain 1, NCBI Domains14-3-3, 14-3-3 domainDomain 2, NCBI Domains	247.368	0.00240861	0.00236118	-6.5254	-5.62656	-6.13804	-6.29557	-6.16848	-5.76205	-0.0696048	0.947849	0.972496	1.02009	0.980307
gi|170763500|	21	14	9	12	11	27	33500	SET, protein SET isoform 1 .NAP, Nucleosome assembly protein (NAP)PTZ00007, (NAP-L) nucleosome assembly protein -L	293.86	0.000860966	0.000906122	-6.78657	-7.0266	-7.4767	-7.29197	-7.3796	-6.56167	-0.0574146	0.956969	0.976345	0.950166	1.05245
gi|189055078|	48	36	30	43	46	34	65300	unnamed protein product NADB_Rossmann, Rossmann-fold NAD(P)(+)-binding proteinsHEAT_2, HEAT repeats	572.807	0.00112849	0.00113987	-6.64051	-6.77089	-6.97771	-6.71239	-6.64994	-7.00234	-0.0556646	0.958278	0.976345	0.990017	1.01008
gi|189065477|	54	67	62	73	61	65	47200	unnamed protein product .PLN00191, enolaseenolase, Enolase: Enolases are homodimeric enzymes that catalyse...	414.035	0.00253603	0.00253313	-6.19927	-5.83147	-5.93567	-5.86326	-6.04575	-6.03665	-0.0555527	0.958362	0.976345	1.00115	0.998856
gi|380764082|	11	19	4	13	7	13	59100	Chain D, Crystal Structure Of C-Terminal Truncation Of Udp-Glucose Pyrophosphorylase Of Homo Sapiens.UGPase_euk, Eukaryotic UGPase catalyses the synthesis of UDP-Glu...Domain 8, NCBI DomainsDomain 7, NCBI Domains	518.421	0.000390377	0.000346948	-7.97996	-7.29802	-8.7916	-7.7827	-8.37472	-7.84085	-0.0504698	0.962168	0.977085	1.12517	0.888751
gi|189053081|	7	1	2	2	1	10	15700	unnamed protein product .Ribosomal_L28e, Ribosomal L28e protein family	137.719	0.000451371	0.000538617	-7.08184	-8.5374	-8.05382	-8.14353	-8.65859	-6.76659	-0.049085	0.963205	0.977085	0.838019	1.19329
gi|189053064|	3	2	17	1	3	43	30000	unnamed protein product .Ribosomal_L7Ae, Ribosomal protein L7Ae/L30e/S12e/Gadd45 family	263.158	0.00051356	0.000933358	-8.49151	-8.67411	-6.75544	-9.30189	-8.45883	-5.99274	-0.047916	0.96408	0.977085	0.550228	1.81743
gi|4506921|	3	2	6	9	5	1	34000	SGTA, small glutamine-rich tetratricopeptide repeat-containing protein alpha .TPR, Tetratricopeptide repeat domainTPR_11 (2&times;), TPR repeat	298.246	0.000237851	0.000293294	-8.61668	-8.79928	-7.87101	-7.58122	-8.13201	-9.4852	-0.0466208	0.96505	0.977085	0.810966	1.2331
gi|158255040|	1	5	1	4	1	2	69200		607.018	8.14827e-05	7.34271e-05	-10.1746	-8.72146	-10.048	-9.03908	-10.1419	-9.68502	-0.0461002	0.96544	0.977085	1.10971	0.901138
gi|12007484|	3	0	5	2	1	3	27600	OCIA, ovarian carcinoma immunoreactive antigen .OCIA, Ovarian carcinoma immunoreactive antigen (OCIA)	242.105	0.000219343	0.000160813	-8.40813	-10.2002	-7.82951	-8.70768	-9.22275	-8.42936	-0.0346563	0.974014	0.98253	1.36396	0.733159
gi|189053202|	8	0	7	1	6	4	13700	unnamed protein product .Ribosomal_S25, S25 ribosomal protein	120.175	0.000753008	0.000542549	-6.82041	-9.49975	-6.81894	-8.51809	-7.05599	-7.47763	-0.0293252	0.97801	0.983648	1.38791	0.720509
gi|62988870|	1	13	5	4	9	3	116000	ITGAV, unknown .Integrin_alpha2, Integrin alphaInt_alpha (5&times;), Integrin alpha (beta-propellor repeats)	1017.54	0.000118715	9.05284e-05	-10.6912	-8.34011	-9.26529	-9.55567	-8.8127	-9.86513	-0.0279804	0.979018	0.983648	1.31135	0.762571
gi|158259545|	1	2	3	2	1	4	45500	unnamed protein product .Crp (2&times;), cAMP-binding proteins - catabolite gene activator and regul...DD_RIIalpha_PKA, Dimerization/Docking domain of the Type II alpha ...CAP_ED (2&times;), effector domain of the CAP family of transcription facto...	399.123	0.000108089	0.000110163	-9.75533	-9.09063	-8.7814	-9.20758	-9.72264	-8.67794	-0.0153547	0.988485	0.991183	0.981169	1.01919
gi|189069128|	11	17	4	13	7	11	47600	unnamed protein product WD40, WD40 domain, found in a number of eukaryotic proteins that...	417.544	0.000455959	0.000406653	-7.76356	-7.18984	-8.5752	-7.5663	-8.15833	-7.78479	-0.0146201	0.989035	0.991183	1.12125	0.891863
gi|189065222|	19	10	21	15	20	17	15700	unnamed protein product .Lipocalin, Lipocalin / cytosolic fatty-acid binding protein fami...	137.719	0.0020968	0.00203135	-6.12633	-6.59149	-5.90206	-6.31898	-6.04363	-6.25577	-0.00227313	0.998295	0.998295	1.03222	0.968787
gi|62822371|	6	1	1	3	1	3	23800	tmp_locus_5, unknown .TMPK, Thymidine monophosphate kinase (TMPK), also known as thymi...Thymidylate_kin, Thymidylate kinase	208.772	0.000245159	0.00021205	-7.64096	-8.95343	-8.98067	-8.22308	-9.07462	-8.28123	0.00247723	0.998142	0.998295	1.15614	0.864947
gi|3639058|	4	3	0	2	2	1	55000	amino acid transporter E16 .2A0308, L-type amino acid transporter	482.456	9.75346e-05	7.0841e-05	-8.84633	-8.94378	-10.9169	-9.3972	-9.40144	-9.96618	0.0274911	0.979385	0.983648	1.37681	0.726317
gi|47678743|	14	10	19	20	15	11	17900	UBE2L3, UBE2L3 .UBCc, Ubiquitin-conjugating enzyme E2, catalytic (UBCc) domain. ...	157.018	0.00160097	0.00159002	-6.55373	-6.72263	-6.13083	-6.17053	-6.45436	-6.80676	0.0320102	0.975997	0.983456	1.00689	0.993155
gi|20147707|	13	11	7	15	16	5	40500	GNAI3, guanine nucleotide binding protein alpha i3 .G_alpha, G protein alpha subunitG-alpha, Alpha subunit of G proteins (guanine nucleotide binding...	355.263	0.000512831	0.000557567	-7.44169	-7.44816	-7.90285	-7.26662	-7.20834	-8.36086	0.0355116	0.973373	0.98253	0.919767	1.08723
gi|189054540|	15	26	11	9	43	13	112800	unnamed protein product .Cation_ATPase_C, Cation transporting ATPase, C-terminusCOG4087, Soluble P-type ATPase [General function prediction only...ATPase-IIC_X-K, sodium or proton efflux -- potassium uptake anti...Cation_ATPase_N, Cation transporter/ATPase, N-terminusE1-E2_ATPase, E1-E2 ATPaseHydrolase_like2, Putative hydrolase of sodium-potassium ATPase alpha ...	989.474	0.000309054	0.000353537	-8.32786	-7.63768	-8.49972	-8.78048	-7.26325	-8.48723	0.0410121	0.969252	0.979868	0.874176	1.14393
gi|311078508|	5	6	3	9	4	3	52300	RBBP7, histone-binding protein RBBP7 isoform 1 WD40, WD40 domain, found in a number of eukaryotic proteins that...	458.772	0.000191175	0.000201036	-8.59533	-8.2744	-8.92068	-8.01186	-8.76332	-9.06854	0.0486535	0.963528	0.977085	0.950952	1.05158
gi|158254736|	40	42	28	33	40	44	32600	unnamed protein product .Nucleoplasmin, Nucleoplasmin	285.965	0.0022016	0.00216121	-6.12609	-5.92402	-6.35086	-6.27892	-6.09341	-6.05313	0.0577021	0.956753	0.976345	1.01869	0.981652
gi|158261759|	3	3	1	3	2	2	47400	unnamed protein product .COG1100, GTPase SAR1 and related small G proteins [General funct...CDC_Septin, CDC/Septin GTPase familyTrbI, Bacterial conjugation TrbI-like protein	415.789	0.000114843	0.000107143	-8.94894	-8.79507	-9.6696	-8.91201	-9.25273	-9.30664	0.0649471	0.951332	0.973481	1.07186	0.932954
gi|158255592|	12	5	12	11	10	8	23600	unnamed protein product .Clathrin_lg_ch, Clathrin light chain	207.018	0.000822359	0.000772685	-6.9786	-7.64571	-6.85197	-7.02505	-7.12027	-7.38549	0.0676423	0.949317	0.972496	1.06429	0.939596
gi|62822096|	3	1	3	3	2	2	35500	TP53I3, unknown .PTZ00354, alcohol dehydrogenasep53_inducible_oxidoreductase, PIG3 p53-inducible quinone oxidoreductase	311.404	0.000152304	0.000143059	-8.65985	-9.35327	-8.53322	-8.62292	-8.96364	-9.01755	0.06799	0.949057	0.972496	1.06463	0.939295
gi|217330598|	5	2	1	1	3	4	33200	GLOD4, glyoxalase domain-containing protein 4 .Glo_EDI_BRP_like_21, This conserved domain belongs to a superfamily ...PLN02300, lactoylglutathione lyaseGlo_EDI_BRP_like, This domain superfamily is found in a variety of ...	291.228	0.000178684	0.000169145	-8.14088	-8.77547	-9.31353	-9.40324	-8.56018	-8.36278	0.0689834	0.948314	0.972496	1.0564	0.946614
gi|189055325|	51	52	35	59	34	56	44600	unnamed protein product .Phosphoglycerate_kinase, Phosphoglycerate kinase (PGK) is a monomeric enzyme ...	391.228	0.00201161	0.0020073	-6.19923	-6.02613	-6.44465	-6.01791	-6.56717	-6.1278	0.0690075	0.948296	0.972496	1.00215	0.997857
gi|407020535|	3	7	2	2	3	8	91800	ARMC9, lisH domain-containing protein ARMC9 isoform 1 .LisH, LisHARM, Armadillo/beta-catenin-like repeats. An approximately 40 am...	805.263	9.63427e-05	9.28091e-05	-9.60993	-8.69392	-9.81977	-9.90948	-9.57725	-8.74385	0.0728279	0.945439	0.972496	1.03807	0.963322
gi|189065315|	11	7	26	9	11	23	12800	unnamed protein product .PTZ00106, 60S ribosomal protein L30	112.281	0.00230509	0.00204954	-6.45018	-6.72375	-5.48875	-6.60431	-6.4175	-5.75675	0.0850347	0.93632	0.971037	1.12469	0.889135
gi|189054491|	12	21	24	18	20	20	34300	unnamed protein product .Ribosomal_L18_c, Ribosomal L18 C-terminal regionRibosomal_L18_L5e, Ribosomal L18/L5e: L18 (L5e) is a ribosomal ...PTZ00069, 60S ribosomal protein L5	300.877	0.00111761	0.00103321	-7.3525	-6.6563	-6.55292	-6.92353	-6.82512	-6.87903	0.0870142	0.934842	0.971037	1.08168	0.924484
gi|189066689|	5	5	8	6	8	5	16400	unnamed protein product .UBCc, Ubiquitin-conjugating enzyme E2, catalytic domain homologu...	143.86	0.000770845	0.000747572	-7.43561	-7.28174	-6.87366	-7.23163	-6.96761	-7.45684	0.098904	0.925973	0.963555	1.03113	0.969808
gi|158260159|	3	2	2	1	2	6	11400	unnamed protein product .ATP-synt_G, Mitochondrial ATP synthase g subunit	100	0.000475892	0.000540158	-7.52393	-7.70653	-7.73377	-8.3343	-7.82772	-6.92612	0.0990415	0.92587	0.963555	0.881025	1.13504
gi|62822430|	3	3	10	2	8	6	23200	COP9, unknown .PCI_Csn8, COP9 signalosome, subunit CSN8	203.509	0.000492781	0.000448309	-8.23447	-8.0806	-7.00922	-8.53402	-7.31448	-7.63666	0.101047	0.924376	0.963555	1.0992	0.909753
gi|189066690|	64	58	64	68	75	57	17300	unnamed protein product .NDPk_I, Nucleoside diphosphate kinase Group I (NDPk_I)-like: NDP...NDK, Nucleoside diphosphate kinase	151.754	0.0069792	0.00696018	-5.02712	-4.97089	-4.90049	-4.93003	-4.83697	-5.16323	0.101981	0.923679	0.963555	1.00273	0.997274
gi|189054059|	1	1	2	2	4	0	36900	unnamed protein product .EFh (3&times;), EF-hand, calcium binding motifEF-hand_7, EF-hand domain pair	323.684	9.67146e-05	0.000122868	-9.54583	-9.39195	-8.90837	-8.99808	-8.41453	-10.6657	0.110331	0.917461	0.963555	0.787144	1.27042
gi|410171122|	6	1	4	1	5	5	16500	LOC101060318, PREDICTED: eukaryotic translation initiation factor 1A, X-chromosomal-like isoform X1 .S1_IF1A, S1_IF1A: Translation initiation factor IF1A, also refer...	144.737	0.000474613	0.000448554	-7.27464	-8.5871	-7.51573	-8.70405	-7.40901	-7.46292	0.113213	0.915316	0.963326	1.0581	0.945093
gi|47678301|	2	3	11	3	8	3	26100	ATP6E, ATP6E .vATP-synt_E, ATP synthase (E/31 kDa) subunit	228.947	0.00044106	0.000355831	-8.68872	-8.19838	-7.03604	-8.31533	-7.43227	-8.37348	0.114355	0.914467	0.963326	1.23952	0.806762
gi|158260427|	2	4	1	1	3	3	15500	unnamed protein product .NDUF_B6, NADH:ubiquinone oxidoreductase, NDUFB6/B17 subunit	135.965	0.000357489	0.000325267	-8.16763	-7.42597	-8.55182	-8.64153	-7.79847	-7.85238	0.114387	0.914443	0.963326	1.09906	0.909866
gi|47678697|	11	5	11	10	8	9	13900	SNRPD3, SNRPD3 .Sm_D3, Sm protein D3	121.93	0.00130618	0.00122226	-6.53262	-7.11635	-6.40599	-6.58667	-6.80222	-6.7449	0.115229	0.913817	0.963326	1.06866	0.935752
gi|261862352|	12	11	5	10	7	11	53400	SHMT2, serine hydroxymethyltransferase, mitochondrial isoform 3 .PLN03226, serine hydroxymethyltransferaseSHMT, Serine-glycine hydroxymethyltransferase (SHMT). This famil...	468.421	0.000353043	0.000328308	-7.79516	-7.72467	-8.48951	-7.93259	-8.2733	-7.89977	0.118177	0.911625	0.963326	1.07534	0.929938
gi|189067490|	1	4	5	2	4	3	14200	unnamed protein product .Prefoldin_2, Prefoldin subunit	124.561	0.000536377	0.000440546	-8.59086	-7.33837	-7.16494	-8.04311	-7.45956	-7.76479	0.120396	0.909975	0.963326	1.21753	0.821337
gi|189069175|	16	12	9	17	10	12	50900	unnamed protein product .PTZ00435, isocitrate dehydrogenase	446.491	0.000482186	0.000475076	-7.46958	-7.59334	-7.89502	-7.37382	-7.88888	-7.76844	0.121764	0.908958	0.963326	1.01497	0.985255
gi|62702302|	20	14	9	24	9	13	47300	ACTR3, unknown .NBD_sugar-kinase_HSP70_actin, Nucleotide-Binding Domain of the sugar ...PTZ00280, Actin-related protein 3	414.912	0.00059738	0.000600592	-7.17916	-7.37157	-7.82167	-6.96399	-7.91562	-7.61813	0.123069	0.907988	0.963326	0.994652	1.00538
gi|189065416|	17	16	24	15	31	16	67500	unnamed protein product .Calreticulin, Calreticulin family	592.105	0.000560688	0.000562693	-7.69301	-7.59797	-7.2299	-7.77744	-7.07254	-7.77307	0.124516	0.906913	0.963326	0.996437	1.00358
gi|189067592|	3	1	4	2	1	6	21200	unnamed protein product .DUF106, Integral membrane protein DUF106	185.965	0.000286426	0.000290584	-8.14432	-8.83774	-7.76637	-8.44387	-8.95893	-7.54651	0.129167	0.90346	0.963326	0.985693	1.01451
gi|62089126|	5	4	1	4	2	3	54900	annexin A11 variant, partial .Annexin (4&times;), AnnexinDUF1373, Protein of unknown function (DUF1373)	481.579	0.000132968	0.000114042	-8.64384	-8.69064	-9.8165	-8.80759	-9.39962	-9.11706	0.137621	0.89719	0.96068	1.16596	0.857664
gi|410171313|	3	8	9	10	10	2	24000	LOC101060541, PREDICTED: RNA-binding protein 8A-like isoform 2 .COG0724, RNA-binding proteins (RRM domain) [General function pre...RRM_RBM8, RNA recognition motif in RNA-binding protein RBM8A, RB...	210.526	0.00059109	0.000590965	-8.26837	-7.22719	-7.14321	-7.13283	-7.13708	-8.62607	0.139449	0.895835	0.960466	1.00021	0.999788
gi|2935618|	29	31	40	33	30	43	34300	WUGSC:H_278C19.2, 60S ACIDIC RIBOSOMAL PROTEIN; match to P05388 (PID:g133041) .Ribosomal_60s, 60s Acidic ribosomal proteinPTZ00135, 60S acidic ribosomal protein P0Ribosomal_P0_L10e, Ribosomal protein L10 family, P0 and L10e sub...	300.877	0.00191797	0.00186075	-6.49383	-6.27436	-6.05029	-6.32976	-6.42782	-6.12669	0.140769	0.894857	0.960466	1.03075	0.970166
gi|5803013|	9	10	23	11	13	16	29000	ERP29, endoplasmic reticulum resident protein 29 isoform 1 precursor .ERp29c, ERp29 and ERp38, C-terminal domainPDI_a_ERp29_N, PDIa family, endoplasmic reticulum protein 29 (ER...	254.386	0.000978888	0.000849811	-7.45908	-7.20513	-6.42674	-7.2311	-7.075	-6.92824	0.14815	0.889393	0.959006	1.15189	0.868139
gi|158257974|	4	3	8	3	5	7	42700	unnamed protein product .RBM1CTR, RBM1CTR (NUC064) familyRRM_RBMX_like, RNA recognition motif in heterogeneous nuclear ri...COG0724, RNA-binding proteins (RRM domain) [General function pre...	374.561	0.000250303	0.000228707	-8.5932	-8.69064	-7.83058	-8.80759	-8.35985	-8.1036	0.153117	0.88572	0.956163	1.09443	0.91372
gi|189065469|	24	17	8	18	18	11	70800	unnamed protein product .CH (4&times;), Calponin homology domainSAC6, Ca2+-binding actin-bundling protein fimbrin/plastin (EF-Ha...EFh, EF-hand, calcium binding motif	621.053	0.000451797	0.000410479	-7.40426	-7.58686	-8.33624	-7.64824	-7.65249	-8.18182	0.154088	0.885002	0.956163	1.10066	0.908546
gi|158257666|	3	2	1	3	0	6	51800	unnamed protein product .Peptidase_C1A_CathepsinC, Cathepsin CCathepsinC_exc, Cathepsin C exclusion domain	454.386	9.18867e-05	0.000118976	-9.03771	-9.22031	-9.75837	-9.00078	-10.9509	-8.4399	0.158103	0.882036	0.955539	0.772314	1.29481
gi|189065572|	4	2	8	10	5	1	49000	unnamed protein product .eRF1_3, eRF1 domain 3eRF1, Peptide chain release factor 1 (eRF1) [Translation, riboso...eRF1_1, eRF1 domain 1eRF1_2, eRF1 domain 2	429.825	0.000204166	0.000215925	-8.73082	-9.16474	-7.9682	-7.8466	-8.49747	-9.85066	0.160805	0.880042	0.954499	0.945539	1.0576
gi|189065549|	21	31	27	32	31	20	50600	unnamed protein product .GDI, GDP dissociation inhibitor	443.86	0.00103647	0.00100039	-7.19898	-6.66317	-6.82621	-6.74887	-6.78436	-7.26783	0.162928	0.878475	0.954499	1.03607	0.965189
gi|158259255|	12	7	6	11	10	5	107700	unnamed protein product synthetase), one...PRK05385, phosphoribosylaminoimidazole synthetasepurD, phosphoribosylamine--glycine ligaseGARS_A, Phosphoribosylglycinamide synthetase, ATP-grasp (A) doma...GARS_N, Phosphoribosylglycinamide synthetase, N domain	944.737	0.000155828	0.000153328	-8.4967	-8.85365	-9.02399	-8.54316	-8.63837	-9.33891	0.165018	0.876934	0.954493	1.0163	0.983958
gi|3845409|	12	12	5	9	10	9	44500	GARS, glycyl tRNA synthetase, partial .GlyRS_anticodon, GlyRS Glycyl-anticodon binding domain. GlyRS be...class_II_aaRS-like_core, Class II tRNA amino-acyl synthetase-like catalytic ...	390.351	0.000439018	0.000395341	-7.61284	-7.45897	-8.30719	-7.85035	-7.75451	-7.9085	0.16919	0.873859	0.952597	1.11048	0.900511
gi|62087736|	7	9	8	7	15	5	21300	proteasome beta 1 subunit variant, partial .PRE1, 20S proteasome, alpha and beta subunits [Posttranslational...Ntn_hydrolase, The Ntn hydrolases (N-terminal nucleophile) are a ...	186.842	0.000776982	0.000803235	-7.38688	-6.99662	-7.13509	-7.34996	-6.62826	-7.71827	0.174464	0.869975	0.950281	0.967316	1.03379
gi|189054670|	3	3	6	4	5	3	103900	unnamed protein product .Cullin, Cullin familyCullin_Nedd8, Cullin protein neddylation domainCULLIN, Cullin	911.404	8.44154e-05	7.77499e-05	-9.73374	-9.57987	-8.98807	-9.44551	-9.24908	-9.75497	0.181996	0.864437	0.948722	1.08573	0.92104
gi|189069155|	21	16	9	17	9	21	66400	unnamed protein product .Filament, Intermediate filament proteinLTD, Lamin Tail Domain	582.456	0.00045497	0.000432852	-7.47072	-7.58154	-8.16085	-7.63965	-8.2548	-7.49195	0.18234	0.864184	0.948722	1.0511	0.951387
gi|62988933|	10	6	0	6	2	1	37400	GLS, unknown, partial .Glutaminase, Glutaminase	328.07	0.000292343	0.000169242	-7.61337	-7.93908	-10.5313	-8.05602	-9.01578	-9.58051	0.184947	0.862269	0.948599	1.72737	0.578916
gi|62087708|	139	136	143	163	142	141	36900	eukaryotic translation elongation factor 1 alpha 2 variant, partial .EF1_alpha, Elongation Factor 1-alpha (EF1-alpha) protein familyEF1_alpha_II, EF1_alpha_II: this family represents the domain II ...	323.684	0.00733387	0.0072359	-5.01323	-4.88109	-4.85832	-4.81755	-4.95927	-5.02022	0.192082	0.857035	0.946224	1.01354	0.986641
gi|158258667|	35	32	23	27	38	29	16800	unnamed protein product .PLN03107, eukaryotic translation initiation factor 5AS1_eIF5A, S1_eIF5A: Eukaryotic translation Initiation Factor 5A ...	147.368	0.00349258	0.00339191	-5.59493	-5.52935	-5.88083	-5.81335	-5.48112	-5.8013	0.197235	0.853261	0.944811	1.02968	0.971175
gi|189069428|	7	7	1	2	6	4	100700		883.333	0.000104508	7.98538e-05	-8.94032	-8.78645	-10.4231	-10.002	-9.05074	-9.47238	0.212018	0.842458	0.937578	1.30875	0.76409
gi|158255150|	2	1	6	8	1	1	101100	unnamed protein product .MetRS_RNA, MetRS_RNA binding domain. This short RNA-binding doma...PRK12268, methionyl-tRNA synthetaseGst, Glutathione S-transferase [Posttranslational modification, ...Thioredoxin_like, Protein Disulfide Oxidoreductases and Other Pr...MetRS_core, catalytic core domain of methioninyl-tRNA synthetase...Anticodon_Ia_Met, Anticodon-binding domain of methionyl tRNA syn...GST_…	886.842	6.74266e-05	6.86504e-05	-10.0429	-10.3999	-8.96076	-8.7822	-10.521	-10.575	0.216553	0.839153	0.935432	0.982173	1.01815
gi|189053137|	10	12	10	16	4	17	20200	unnamed protein product .Ribosomal_L5, Ribosomal protein L5Ribosomal_L5_C, ribosomal L5P family C-terminusPTZ00156, 60S ribosomal protein L11	177.193	0.00107381	0.00112912	-6.99739	-6.66916	-6.87075	-6.50848	-7.812	-6.50779	0.21795	0.838135	0.935428	0.951011	1.05151
gi|10120947|	1	9	15	8	3	5	27500	Chain A, Glutathione Transferase From Homo Sapiens.Domain 1, NCBI DomainsGst, Glutathione S-transferase [Posttranslational modification, ...Domain 2, NCBI DomainsGST_N_Omega, GST_N family, Class Omega subfamilyGST_C_Omega, C-terminal, alpha helical domain of Class Omega Glu...	241.228	0.000643275	0.000379928	-9.2518	-7.2521	-6.78979	-7.48028	-8.37182	-7.97375	0.222202	0.835041	0.933102	1.69315	0.590615
gi|189065428|	9	6	1	3	3	6	54100	unnamed protein product .PRK06327, dihydrolipoamide dehydrogenasePyr_redox, Pyridine nucleotide-disulphide oxidoreductasePyr_redox_dim, Pyridine nucleotide-disulphide oxidoreductase, di...NAD_binding_8, NAD(P)-binding Rossmann-like domain	474.561	0.000203563	0.000147509	-8.08262	-8.30824	-9.80182	-9.04423	-9.04847	-8.48334	0.223744	0.833919	0.933102	1.38	0.724638
gi|189053180|	11	2	3	1	4	11	28700	unnamed protein product .Ribosomal_S6e, Ribosomal protein S6e	251.754	0.000375643	0.000356768	-7.25763	-8.62981	-8.32058	-9.25759	-8.16322	-7.27886	0.231715	0.82813	0.930099	1.05291	0.949752
gi|126012562|	5	9	6	4	11	6	504300	LRP1, prolow-density lipoprotein receptor-related protein 1 precursor EGF_CA, Calcium-binding EGF-like domain, present in a large numb...LY (25&times;), Low-density lipoprotein-receptor YWTD domainCOG3386, Gluconolactonase [Carbohydrate transport and metabolism...	4423.68	2.7853e-05	2.66404e-05	-10.8615	-10.1611	-10.5678	-11.0252	-10.0912	-10.7157	0.235891	0.825103	0.928744	1.04551	0.956467
gi|194380236|	4	6	6	3	6	8	94600	unnamed protein product .GST_C_CysRS_N, Glutathione S-transferase C-terminal-like, alpha ...CysRS_core, catalytic core domain of cysteinyl tRNA synthetasePTZ00399, cysteinyl-tRNA-synthetase	829.825	0.000120597	0.000115703	-9.38866	-8.86706	-8.8943	-9.60305	-8.98825	-8.7739	0.238453	0.823248	0.927787	1.0423	0.959419
gi|189065487|	9	4	3	4	4	7	44800	unnamed protein product .RRM (2&times;), RRM (RNA recognition motif), also known as RBD (RNA binding...	392.982	0.000245	0.000218044	-7.894	-8.48734	-8.76589	-8.60429	-8.60853	-8.15161	0.242569	0.82027	0.926694	1.12363	0.889974
gi|189053066|	14	5	28	2	12	44	29600	unnamed protein product .RS4NT, RS4NT (NUC023) domainRibosomal_S4e, Ribosomal family S4eS4, S4/Hsp/ tRNA synthetase RNA-binding domainPLN00036, 40S ribosomal protein S4KOW_RPS4, KOW motif of Ribosomal Protein S4 (RPS4)	259.649	0.00105498	0.0011701	-7.0567	-7.87223	-6.25432	-8.77764	-7.17244	-5.95659	0.25625	0.810397	0.920692	0.901612	1.10912
gi|189053470|	6	2	1	3	8	0	58700	unnamed protein product .SerRS_core, Seryl-tRNA synthetase (SerRS) class II core catalyti...PLN02678, seryl-tRNA synthetaseSeryl_tRNA_N, Seryl-tRNA synthetase N-terminal domain	514.912	0.00011105	0.00012888	-8.54372	-9.34536	-9.88342	-9.12583	-8.24277	-11.1299	0.257823	0.809264	0.920692	0.861652	1.16056
gi|20379076|	8	4	11	10	10	3	23000	RAB18, small GTP binding protein RAB18 .Rab18, Rab GTPase family 18 (Rab18)	201.754	0.000683185	0.000641615	-7.33851	-7.82062	-6.90959	-7.09027	-7.09452	-8.24704	0.259598	0.807987	0.920692	1.06479	0.939153
gi|62088156|	1	3	1	0	4	2	58800	calcium/calmodulin-dependent protein kinase II delta isoform 1 variant, partial .STKc_AGC, Catalytic domain of AGC family Protein Serine/Threonin...CaMKII_AD, Calcium/calmodulin dependent protein kinase II Associ...S_TKc, Serine/Threonine protein kinases, catalytic domain	515.789	7.26354e-05	7.59368e-05	-10.0118	-9.01059	-9.88512	-11.0734	-8.88046	-9.52216	0.262127	0.806169	0.91977	0.956525	1.04545
gi|189054795|	1	1	7	2	3	1	80000	unnamed protein product .Calpain_III, Calpain, subdomain III. Calpains are calcium-activa...EF_hand_6, EF-hand domain pairEFh, EF-hand, calcium binding motifCysPc, Calpains, domains IIa, IIbFRQ1, Ca2+-binding protein (EF-Hand superfamily) [Signal transdu...	701.754	8.61997e-05	5.62753e-05	-10.3196	-10.1658	-8.58357	-9.77189	-9.43966	-10.3409	0.262429	0.805952	0.91977	1.53175	0.652848
gi|158260773|	18	15	6	15	16	6	24700	unnamed protein product .SNC1, Synaptobrevin/VAMP-like protein [Intracellular trafficking...Synaptobrevin, SynaptobrevinLongin, Regulated-SNARE-like domain	216.667	0.00104336	0.000937467	-6.63211	-6.65517	-7.55145	-6.77212	-6.71384	-7.69931	0.262586	0.805839	0.91977	1.11296	0.898508
gi|189055107|	9	5	10	8	6	10	16600	unnamed protein product .Prefoldin_2, Prefoldin subunit	145.614	0.000983007	0.00091176	-6.90119	-7.29386	-6.67447	-6.97549	-7.248	-6.82233	0.26759	0.802246	0.91977	1.07814	0.927521
gi|189065561|	3	5	1	3	4	1	38900		341.228	0.000175095	0.000146945	-8.75131	-8.14545	-9.47198	-8.71439	-8.46731	-9.61984	0.277775	0.794952	0.915969	1.19157	0.839229
gi|158255676|	6	4	8	2	3	20	23600	unnamed protein product .Ribosomal_L13, Ribosomal protein L13. Protein L13, a large ribo...	207.018	0.00053154	0.000652865	-7.63252	-7.84638	-7.23763	-8.55111	-8.21888	-6.50513	0.282753	0.791395	0.913072	0.814165	1.22825
gi|24797095|	8	4	4	7	3	6	33300	PYCR1, pyrroline-5-carboxylate reductase 1, mitochondrial isoform 2 .PRK11880, pyrroline-5-carboxylate reductasePLN02688, pyrroline-5-carboxylate reductase	292.105	0.000331987	0.000312722	-7.70857	-8.19069	-8.21793	-7.79681	-8.56319	-7.99806	0.283895	0.79058	0.913072	1.0616	0.941972
gi|73765546|	12	5	10	13	12	3	16500	UBE2V1, ubiquitin-conjugating enzyme E2 variant 1 isoform d .UBCc, Ubiquitin-conjugating enzyme E2, catalytic domain homologu...	144.737	0.00109556	0.00107841	-6.62071	-7.28782	-6.66843	-6.50683	-6.58803	-7.9149	0.285975	0.789097	0.913072	1.01591	0.98434
gi|208879470|	11	2	8	7	9	2	15500	EEF1E1, eukaryotic translation elongation factor 1 epsilon-1 isoform 2 .GST_C_family, C-terminal, alpha helical domain of the Glutathione ...	135.965	0.000910204	0.000758217	-6.64157	-8.01376	-6.81722	-7.03209	-6.79995	-8.18886	0.300344	0.778877	0.910828	1.20045	0.833018
gi|189053145|	8	7	13	12	4	13	16000	unnamed protein product .globin, Globins are heme proteins, which bind and transport oxyg...	140.351	0.00119347	0.00112994	-6.9756	-6.94689	-6.38635	-6.55302	-7.57891	-6.53421	0.301617	0.777975	0.910828	1.05623	0.946763
gi|28827795|	4	9	8	9	6	5	24900	CHMP4B, charged multivesicular body protein 4b .Snf7, Snf7	218.421	0.00059401	0.000517015	-8.05387	-7.15278	-7.29125	-7.26973	-7.65346	-7.87443	0.301653	0.777949	0.910828	1.14892	0.870381
gi|89903012|	17	32	18	22	18	25	21200	CDC42, cell division control protein 42 homolog isoform 1 precursor .COG1100, GTPase SAR1 and related small G proteins [General funct...Cdc42, cell division cycle 42 (Cdc42) is a small GTPase of the R...	185.965	0.00211297	0.00186467	-6.53488	-5.76197	-6.35268	-6.24664	-6.44663	-6.17963	0.301843	0.777815	0.910828	1.13316	0.882489
gi|189065316|	15	9	16	14	14	12	16500	unnamed protein product .MAPEG, MAPEG family	144.737	0.00160991	0.00150178	-6.4056	-6.74128	-6.21645	-6.43537	-6.43961	-6.64194	0.304899	0.775649	0.910828	1.072	0.932833
gi|189053074|	5	2	9	5	7	2	16700	unnamed protein product .ADF_GMF-beta_like, ADF-homology domain of glia maturation factor beta ...	146.491	0.000674003	0.000558331	-7.45374	-8.08832	-6.78056	-7.41682	-7.1109	-8.26343	0.305472	0.775244	0.910828	1.20718	0.82838
gi|47678401|	8	6	6	10	7	4	34200	DIA1, DIA1 .PTZ00319, NADH-cytochrome B5 reductasecyt_b5_reduct_like, Cytochrome b5 reductase catalyzes the reduction of ...	300	0.000402154	0.000395141	-7.73524	-7.84963	-7.87687	-7.48701	-7.82772	-8.39246	0.30576	0.77504	0.910828	1.01775	0.98256
gi|189065568|	7	3	1	5	3	1	42600	unnamed protein product .NBD_sugar-kinase_HSP70_actin, Nucleotide-Binding Domain of the sugar ...ACTIN, Actin	373.684	0.000182834	0.000148523	-8.08003	-8.6883	-9.56284	-8.35326	-8.80949	-9.7107	0.308083	0.773396	0.910828	1.23102	0.812337
gi|217272861|	7	6	2	8	6	1	60600	P4HA2, prolyl 4-hydroxylase subunit alpha-2 isoform 2 precursor .2OG-FeII_Oxy, 2OG-Fe(II) oxygenase superfamilyP4Hc, Prolyl 4-hydroxylase alpha subunit homologuesP4Ha_N, Prolyl 4-Hydroxylase alpha-subunit, N-terminal region	531.579	0.00017336	0.000164512	-8.43247	-8.4217	-9.40445	-8.27038	-8.54289	-10.0631	0.318812	0.765823	0.910161	1.05378	0.94896
gi|158256076|	2	2	7	4	2	3	35600	unnamed protein product .RRM, RRM (RNA recognition motif), also known as RBD (RNA binding...eIF3g, Eukaryotic translation initiation factor 3 subunit GCOG0724, RNA-binding proteins (RRM domain) [General function pre...	312.281	0.000229385	0.000175868	-8.99913	-8.84526	-7.77389	-8.37442	-8.96645	-8.68389	0.321409	0.763995	0.909893	1.3043	0.766696
gi|157831273|	104	88	70	72	94	105	21000	Chain A, Hnrnp A1 (Rbd1,2) From Homo Sapiens.Domain 2, NCBI DomainsRRM (2&times;), RRM (RNA recognition motif), also known as RBD (RNA binding...Domain 1, NCBI Domains	184.211	0.00803329	0.00770976	-4.73841	-4.75073	-5.00536	-5.06709	-4.80632	-4.75012	0.328868	0.758753	0.904818	1.04196	0.959727
gi|62089046|	11	6	16	11	6	14	65200	heterogeneous nuclear ribonucleoprotein M isoform a variant, partial .RRM3_hnRNPM, RNA recognition motif 3 in vertebrate heterogeneous ...RRM2_hnRNPM_like, RNA recognition motif 2 in heterogeneous nuclear ...COG0724 (2&times;), RNA-binding proteins (RRM domain) [General function pre...RRM_SF, RNA recognition motif (RRM) superfamily	571.93	0.000339984	0.00029534	-8.07819	-8.49486	-7.59055	-8.04127	-8.61605	-7.86762	0.348514	0.745024	0.893062	1.15116	0.868687
gi|189053652|	7	4	4	7	5	3	46600	unnamed protein product LisH, LisHWD40, WD40 domain, found in a number of eukaryotic proteins that...	408.772	0.000224654	0.000212516	-8.16978	-8.52673	-8.55397	-8.13285	-8.44725	-8.95315	0.350273	0.743801	0.892754	1.05711	0.945972
gi|62087882|	9	19	12	21	23	2	87900	heat shock 70kDa protein 4 isoform a variant, partial .HSPA4_NBD, Nucleotide-binding domain of HSPA4HSP70, Hsp70 protein	771.053	0.000309696	0.000327076	-8.56799	-7.69499	-8.16692	-7.7143	-7.6296	-9.92422	0.352612	0.742175	0.891963	0.946861	1.05612
gi|62822410|	8	1	4	4	5	1	18000	ACP1, unknown .LMWPc, Low molecular weight phosphatase family	157.895	0.000500206	0.000385014	-7.09338	-8.67411	-7.60274	-7.69245	-7.49602	-8.84921	0.353899	0.741281	0.891963	1.29919	0.769712
gi|158255606|	62	53	87	54	65	84	56500	unnamed protein product .F1-ATPase_beta, F1 ATP synthase beta subunit, nucleotide-binding ...PRK09280, F0F1 ATP synthase subunit betaATP-synt_ab_N, ATP synthase alpha/beta family, beta-barrel domainATP-synt_ab_C, ATP synthase alpha/beta chain, C terminal domain	495.614	0.00232661	0.0021475	-6.24215	-6.24377	-5.77905	-6.3422	-6.16259	-5.9618	0.354275	0.74102	0.891963	1.0834	0.923016
gi|3387905|	2	5	2	0	7	4	37900	SGLT1, glucose transporter glycoprotein, partial .MFS, The Major Facilitator Superfamily (MFS) is a large and dive...Sugar_tr, Sugar (and other) transporter	332.456	0.000181803	0.000196052	-9.06174	-8.11941	-8.93511	-10.6343	-7.93044	-8.49518	0.359563	0.737353	0.891963	0.927323	1.07837
gi|22854562|	357	282	252	346	296	280	53600	CTCL tumor antigen HD-CL-06 .Filament_head, Intermediate filament head (DNA binding) regionphage_LysB, phage lysis regulatory protein, LysB familyFilament, Intermediate filament protein	470.175	0.0106493	0.0102874	-4.44549	-4.52708	-4.66659	-4.43982	-4.5999	-4.70928	0.360984	0.736369	0.891954	1.03518	0.966015
gi|189067593|	16	17	18	20	18	15	15400	unnamed protein product .PTZ00018, histone H3H3, Histone H3	135.088	0.00220463	0.00211523	-6.27409	-6.06137	-6.03304	-6.0201	-6.12699	-6.35783	0.362712	0.735173	0.891954	1.04227	0.959447
gi|4504183|	77	94	94	73	101	99	23300	GSTP1, glutathione S-transferase P .GST_C_Pi, C-terminal, alpha helical domain of Class Pi Glutathio...PTZ00057, glutathione s-transferaseGST_N_Pi, GST_N family, Class Pi subfamily	204.386	0.00742243	0.00700901	-5.14125	-4.78906	-4.8163	-5.15732	-4.83879	-4.9126	0.363758	0.73445	0.891954	1.05898	0.944301
gi|410171613|	14	13	20	18	18	11	29600	LOC650157, PREDICTED: peptidyl-prolyl cis-trans isomerase A-like .cyclophilin_ABH_like, cyclophilin_ABH_like: Cyclophilin A, B and H-like ...	259.649	0.00105994	0.000981821	-7.0567	-6.97429	-6.5838	-6.77616	-6.7804	-7.30973	0.365333	0.733361	0.891954	1.07957	0.926295
gi|158254418|	13	17	16	12	20	15	19000	unnamed protein product .TRAP-delta, Translocon-associated protein, delta subunit precurs...	166.667	0.00162429	0.00152207	-6.68483	-6.27144	-6.35753	-6.72487	-6.23441	-6.56791	0.370942	0.729491	0.889459	1.06716	0.937065
gi|62988954|	2	2	1	0	2	4	11400		100	0.000366091	0.000386096	-7.8604	-7.70653	-8.2446	-9.43292	-7.82772	-7.29384	0.373865	0.727478	0.889354	0.948186	1.05465
gi|189066617|	7	6	10	10	5	8	43000	unnamed protein product .DZF, domain in DSRM or ZnF_C2H2 domain containing proteins	377.193	0.00036812	0.000339493	-8.08938	-8.0786	-7.62627	-7.71598	-8.36685	-7.98544	0.376233	0.725849	0.889055	1.08432	0.922234
gi|189054314|	2	1	9	1	5	2	20600	unnamed protein product .S26_SPase_I, The S26 Type I signal peptidase (SPase	180.702	0.000427823	0.000275689	-8.45208	-8.80903	-6.99045	-8.92598	-7.63094	-8.47331	0.385436	0.719534	0.884328	1.55183	0.6444
gi|62988741|	6	4	2	5	2	4	38500	CAPG, unknown .gelsolin_S3_like, Gelsolin sub-domain 3-like domain found in gel...gelsolin_S2_like, Gelsolin sub-domain 2-like domain found in gel...gelsolin_S1_like, Gelsolin sub-domain 1-like domain found in gel...	337.719	0.000222122	0.000193331	-8.12193	-8.33579	-8.95081	-8.25207	-9.04476	-8.51089	0.390359	0.716168	0.881364	1.14892	0.870381
gi|7706337|	10	10	5	6	12	6	20200	COPZ1, coatomer subunit zeta-1 isoform 1 .Clat_adaptor_s, Clathrin adaptor complex small chain	177.193	0.000841391	0.000755309	-6.99739	-6.84351	-7.51738	-7.44004	-6.79035	-7.49819	0.404664	0.70643	0.876503	1.11397	0.897691
gi|189054812|	8	4	4	12	9	0	44700	unnamed protein product .NBD_sugar-kinase_HSP70_actin, Nucleotide-Binding Domain of the sugar ...ACTIN, Actin	392.105	0.000247319	0.000305283	-8.00299	-8.4851	-8.51234	-7.5804	-7.85908	-10.8574	0.406948	0.704881	0.876503	0.810131	1.23437
gi|189053093|	10	6	10	9	5	12	15800	unnamed protein product .Ribosomal_S23, S12-like family, 40S ribosomal protein S23 subfam...	138.596	0.00111317	0.00103074	-6.75171	-7.07741	-6.62508	-6.81487	-7.36566	-6.59859	0.408497	0.703831	0.876503	1.07996	0.925956
gi|47678403|	3	5	1	3	2	2	70900	dJ1014D13.1, dJ1014D13.1 .Paf67, RNA polymerase I-associated factor PAF67	621.93	9.60675e-05	7.16302e-05	-9.35159	-8.74573	-10.0723	-9.31466	-9.65538	-9.70929	0.421821	0.694839	0.871439	1.34116	0.745624
gi|193786356|	3	1	4	4	1	2	17000	unnamed protein product .P16-Arc, ARP2/3 complex 16 kDa subunit (p16-Arc)	149.123	0.000357191	0.000298891	-7.92353	-8.61696	-7.54558	-7.63529	-8.73815	-8.28123	0.422998	0.694048	0.871439	1.19505	0.836784
gi|189066683|	6	8	5	5	10	4	35800	unnamed protein product .Aldo_ket_red, Aldo-keto reductases (AKRs) are a superfamily of s...	314.035	0.000371041	0.000343279	-8.04922	-7.62709	-8.08965	-8.17936	-7.53697	-8.43818	0.423227	0.693893	0.871439	1.08087	0.925177
gi|40254924|	8	5	17	10	10	5	34900	LRRC59, leucine-rich repeat-containing protein 59 .LRR_8 (2&times;), Leucine rich repeatLRR_4 (3&times;), Leucine Rich repeats (2 copies)DUF1682, Protein of unknown function (DUF1682)	306.14	0.000584233	0.000455733	-7.7555	-8.03695	-6.90673	-7.50727	-7.51151	-8.21205	0.429494	0.689688	0.870837	1.28196	0.780055
gi|194384398|	1	6	1	3	3	0	57200		501.754	0.000110532	7.93076e-05	-9.98417	-8.36396	-9.85754	-9.09995	-9.10419	-11.104	0.434312	0.686463	0.867952	1.39371	0.71751
gi|62088934|	10	6	6	12	7	3	43800	CDC10 protein variant, partial .CDC_Septin, CDC/Septin GTPase family	384.211	0.000340782	0.000323208	-7.77134	-8.09704	-8.12428	-7.56006	-8.07513	-8.89118	0.44061	0.68226	0.863822	1.05437	0.94843
gi|189053117|	15	7	14	5	9	22	23300	unnamed protein product .OSCP, ATP synthase delta (OSCP) subunit	204.386	0.00102425	0.000944859	-6.75069	-7.32276	-6.69075	-7.74986	-7.20756	-6.39925	0.447738	0.677521	0.860181	1.08403	0.922487
gi|189053747|	11	4	10	6	8	8	31300	unnamed protein product .RRM1_U1A, RNA recognition motif 1 found in vertebrate U1 small n...COG0724 (2&times;), RNA-binding proteins (RRM domain) [General function pre...RRM2_U1A, RNA recognition motif 2 found in vertebrate U1 small n...	274.561	0.000536955	0.000446713	-7.34435	-8.12875	-7.30869	-7.87797	-7.61395	-7.66786	0.450853	0.675455	0.859924	1.20201	0.831937
gi|189054911|	8	5	5	7	9	2	26800	unnamed protein product .HDGF_related, The PWWP domain is an essential part of the Hepato...	235.088	0.000462851	0.000438521	-7.49141	-7.77286	-7.8001	-7.57965	-7.34751	-8.73642	0.453194	0.673905	0.859924	1.05548	0.947433
gi|62088552|	4	5	2	4	3	3	40100	Drebrin-like protein variant, partial .ADF_gelsolin, Actin depolymerization factor/cofilin- and gelsoli...SH3_Abp1_eu, Src homology 3 domain of eumetazoan Actin-binding p...	351.754	0.00020107	0.000171239	-8.53038	-8.17584	-8.99153	-8.49345	-8.74901	-8.80292	0.454963	0.672735	0.859924	1.17421	0.851636
gi|158261225|	12	4	9	6	6	10	42600	unnamed protein product .creatine_kinase_like, Phosphagen (guanidino) kinases such as creatine ...	373.684	0.000392665	0.000326726	-7.5692	-8.43698	-7.71701	-8.18621	-8.19045	-7.76479	0.460186	0.669286	0.857988	1.20182	0.832072
gi|62088814|	8	1	3	4	2	2	14600	cytochrome b-5 isoform 1 variant, partial .Cyt-b5, Cytochrome b5-like Heme/Steroid binding domain	128.07	0.000571114	0.000389515	-6.88403	-8.46476	-7.64471	-7.4831	-8.07513	-8.12904	0.46146	0.668447	0.857988	1.46622	0.682028
gi|158257188|	4	2	3	1	3	5	45600	unnamed protein product .RPT1, ATP-dependent 26S proteasome regulatory subunit [Posttrans...AAA, The AAA+ (ATPases Associated with a wide variety of cellula...	400	0.000146423	0.000135737	-8.65891	-9.09282	-8.78359	-9.7206	-8.87754	-8.47947	0.46594	0.665499	0.856703	1.07873	0.927015
gi|189054956|	5	3	3	6	4	1	25200	unnamed protein product .SH3_GRB2_C, C-terminal Src homology 3 domain of Growth factor re...SH2_Grb2_like, Src homology 2 domain found in Growth factor rece...SH3_GRB2_N, N-terminal Src homology 3 domain of Growth factor re...	221.053	0.000315358	0.000299253	-7.86517	-8.16329	-8.19053	-7.6612	-8.03316	-9.18569	0.468245	0.663985	0.855948	1.05382	0.948932
gi|20379028|	43	24	21	31	25	27	23200	ARHGDIA, Rho GDP dissociation inhibitor alpha .Rho_GDI, RHO protein GDP dissociation inhibitor	203.509	0.00243812	0.00217217	-5.71447	-6.13469	-6.29255	-6.00032	-6.21587	-6.19427	0.482624	0.654586	0.848571	1.12243	0.890923
gi|189067496|	17	17	15	13	22	15	56600	unnamed protein product .PGDH_4, Phosphoglycerate dehydrogenases, NAD-binding and catalyt...SerA, Phosphoglycerate dehydrogenase and related dehydrogenases ...	496.491	0.000574934	0.000543095	-7.51689	-7.36301	-7.51162	-7.73947	-7.23289	-7.65948	0.485136	0.652952	0.847643	1.05863	0.94462
gi|158255882|	7	2	3	4	2	4	40200	unnamed protein product .ADF_Twf-C_like, C-terminal ADF domain of twinfilin and related p...ADF_Twf-N_like, N-terminal ADF domain of twinfilin and related p...	352.632	0.000209845	0.000170022	-8.02204	-8.96678	-8.65755	-8.49594	-9.08797	-8.5541	0.487879	0.65117	0.846521	1.23423	0.810225
gi|189054340|	10	18	6	6	20	5	111300	unnamed protein product .NBD_sugar-kinase_HSP70_actin, Nucleotide-Binding Domain of the sugar ...ZipA, ZipA C-terminal domain. ZipA, a membrane-anchored protein,...Ehrlichia_rpt, Ehrlichia tandem repeat (Ehrlichia_rpt)HSP70, Hsp70 protein	976.316	0.000207835	0.000175467	-8.70393	-7.98367	-9.05687	-9.14658	-8.0022	-9.37179	0.489323	0.650233	0.846495	1.18447	0.844257
gi|158260787|	8	7	7	10	9	3	36500	unnamed protein product WD40, WD40 domain, found in a number of eukaryotic proteins that...	320.175	0.000413779	0.000387709	-7.80032	-7.77162	-7.79886	-7.55209	-7.65642	-8.70886	0.493006	0.647847	0.84458	1.06724	0.936995
gi|194387706|	1	3	5	2	1	4	36400	unnamed protein product .PTPLA, Protein tyrosine phosphatase-like protein, PTPLAalpha-crystallin-Hsps_p23-like, alpha-crystallin domain (ACD) found in ...	319.298	0.00019046	0.000137704	-9.53218	-8.53101	-8.10627	-8.98443	-9.4995	-8.4548	0.493833	0.647312	0.84458	1.38311	0.723008
gi|12005282|	4	2	5	4	2	4	13700	glutaminase-interacting protein 3 .PDZ_signaling, PDZ domain found in a variety of Eumetazoan signa...	120.175	0.00058451	0.000498896	-7.4564	-7.89031	-7.12909	-7.41947	-8.0115	-7.47763	0.497474	0.644959	0.844393	1.17161	0.853529
gi|158256420|	49	9	22	17	23	16	24900	unnamed protein product .HMGB-UBF_HMG-box (2&times;), HMGB-UBF_HMG-box, class II and III members of the ...	218.421	0.00202772	0.00137961	-5.65597	-7.15278	-6.3178	-6.65882	-6.36826	-6.77581	0.50135	0.64246	0.842316	1.46978	0.680375
gi|47678651|	5	1	2	4	3	0	12300	RBX1, RBX1 .RING, RING-finger (Really Interesting New Gene) domain, a specia...	107.895	0.000480808	0.000418272	-7.14793	-8.29334	-7.80976	-7.31168	-7.56723	-9.56705	0.506421	0.639199	0.840428	1.14951	0.869934
gi|189069136|	2	1	5	1	8	0	104200	unnamed protein product .Xpo1, Exportin 1-like proteinIBN_N, Importin-beta N-terminal domain	914.035	5.90344e-05	6.09267e-05	-10.0731	-10.4301	-9.15801	-10.547	-8.81664	-11.7038	0.509252	0.637383	0.839236	0.968943	1.03205
gi|189066527|	3	1	5	4	2	1	21100	unnamed protein product .TRAP-gamma, Translocon-associated protein, gamma subunit (TRAP-g...	185.088	0.000319321	0.00024232	-8.13959	-8.83301	-7.56097	-7.85135	-8.44338	-9.00812	0.516227	0.632922	0.838796	1.31777	0.758859
gi|62241042|	28	24	18	22	29	18	170500	EPRS, bifunctional glutamate/proline--tRNA ligase .GlnRS_core, catalytic core domain of glutaminyl-tRNA synthetaseProRS_anticodon_zinc, ProRS Prolyl-anticodon binding domain, long version ...ProRS_core_arch_euk, Prolyl-tRNA synthetase (ProRS) class II core ...GST_C_GluProRS_N, Glutathione S-transferase C-terminal-like, alpha ...WEPRS_RNA (3&times;), WEPRS_RNA binding domain. This short RNA-bindin…	1495.61	0.000268467	0.00024737	-8.13191	-8.12927	-8.43741	-8.33138	-8.06474	-8.58527	0.518569	0.631428	0.838796	1.08528	0.921418
gi|42734503|	2	1	3	0	4	2	76800	CAPRIN1, caprin-1 isoform 2 .ApoLp-III_like, Apolipophorin-III and similar insect proteinsCaprin-1_C, Cytoplasmic activation/proliferation-associated prot...	673.684	6.2767e-05	5.81391e-05	-9.76799	-10.1249	-9.30489	-11.3405	-9.14752	-9.78922	0.519284	0.630972	0.838796	1.0796	0.926269
sp|K1C9_HUMAN|	19	11	10	24	10	5	62100	Keratin, type I cytoskeletal 9; Cytokeratin-9; CK-9; Keratin-9; K9;	544.737	0.000423249	0.000393268	-7.50141	-7.87561	-7.99382	-7.23623	-8.08777	-8.78831	0.522907	0.628666	0.838524	1.07624	0.929165
gi|189053385|	15	12	9	18	13	4	86100	unnamed protein product .Sec23_helical, Sec23/Sec24 helical domainSec23_C, C-terminal Actin depolymerization factor-homology domai...zf-Sec23_Sec24, Sec23/Sec24 zinc fingerPLN00162, transport protein sec23Sec23_BS, Sec23/Sec24 beta-sandwich domainSec23-like, Sec23-like: Protein and membrane traffic in eukaryot...	755.263	0.000278246	0.000255693	-8.05775	-8.11899	-8.42066	-7.84389	-8.16322	-9.31574	0.524706	0.627523	0.838524	1.0882	0.918948
gi|189053111|	3	6	5	0	4	14	10400	unnamed protein product .PTZ00059, dynein light chain	91.2281	0.000976612	0.00109162	-7.43212	-6.65921	-6.8535	-9.34111	-7.14813	-6.03196	0.525814	0.62682	0.838524	0.894647	1.11776
gi|62988746|	4	1	1	0	3	2	62500	DNCI2, unknown, partial Dynein_IC2, Cytoplasmic dynein 1 intermediate chain 2	548.246	7.45953e-05	6.1749e-05	-8.97417	-9.91891	-9.94615	-11.1345	-9.1928	-9.58318	0.53011	0.624097	0.83783	1.20804	0.827787
gi|4505621|	44	35	33	31	40	44	21000	PEBP1, phosphatidylethanolamine-binding protein 1 preproprotein .PEBP_euk, PhosphatidylEthanolamine-Binding Protein (PEBP) domain...	184.211	0.0034599	0.00329708	-5.59211	-5.6642	-5.74942	-5.90069	-5.65362	-5.61334	0.536091	0.620319	0.837068	1.04938	0.95294
gi|158255690|	2	5	7	5	4	2	32800	unnamed protein product .ECH, Enoyl-CoA hydratase/isomerase familycrotonase-like, Crotonase/Enoyl-Coenzyme A (CoA) hydratase super...	287.719	0.00031151	0.000228866	-8.91722	-7.97489	-7.69197	-8.09184	-8.29675	-8.93845	0.550731	0.61113	0.829519	1.3611	0.734698
gi|189054152|	20	14	14	12	19	17	21700	unnamed protein product .Cyt-b5, Cytochrome b5-like Heme/Steroid binding domain	190.351	0.00145545	0.00135767	-6.39997	-6.59237	-6.61961	-6.85774	-6.41729	-6.57942	0.553625	0.609324	0.829519	1.07202	0.932819
gi|158257186|	3	2	5	4	6	0	40800	unnamed protein product .URO-D, Uroporphyrinogen decarboxylase (URO-D) is a dimeric cytos...	357.895	0.000181899	0.000170639	-8.799	-8.9816	-8.22038	-8.51076	-8.14728	-10.7661	0.55769	0.606792	0.828504	1.06599	0.938093
gi|3970973|	18	22	17	22	26	7	262100	WUGSC:H_267D11.3, similar to human HsGCN1 U77700 (PID:g2282576); similar to yeast translation activator GCN1 (PID:g462168), partial .HEAT_EZ, HEAT-like repeatARM, Armadillo/beta-catenin-like repeats. An approximately 40 am...DUF3554, Domain of unknown function (DUF3554)HEAT_2, HEAT repeats	2299.12	0.000144516	0.000129895	-8.99403	-8.64442	-8.92297	-8.76137	-8.60198	-9.91813	0.560504	0.605043	0.827732	1.11256	0.898831
gi|189067934|	4	8	5	6	9	1	30400	unnamed protein product .SURF4, SURF4 family	266.667	0.000398378	0.000347698	-8.25344	-7.46358	-7.92614	-7.8488	-7.47355	-9.37328	0.561807	0.604234	0.827732	1.14576	0.872785
gi|158256818|	12	21	17	18	17	11	97600	unnamed protein product .SEC21, Vesicle coat complex COPI, gamma subunit [Intracellular t...COP-gamma_platf, Coatomer gamma subunit appendage platform subdo...	856.14	0.000345041	0.000291559	-8.39823	-7.70203	-7.93512	-7.96926	-8.02907	-8.50284	0.585398	0.589714	0.817327	1.18343	0.844998
gi|189067322|	2	3	4	0	5	4	41500	unnamed protein product .Peptidase_A22B, Signal peptide peptidase	364.035	0.000165147	0.000149851	-9.15248	-8.66214	-8.43806	-10.725	-8.33134	-8.58592	0.587965	0.588148	0.817327	1.10207	0.907381
gi|189053070|	6	3	5	3	7	3	14800	unnamed protein product .Ribosomal_L22e, Ribosomal L22e protein family	129.825	0.0006665	0.000586582	-7.1659	-7.63107	-7.20633	-7.74802	-6.99012	-7.80617	0.597055	0.582624	0.814753	1.13624	0.880093
gi|31542947|	179	174	169	172	178	200	61000	HSPD1, 60 kDa heat shock protein, mitochondrial .GroEL, GroEL_like type I chaperonin. Chaperonins are involved in...groEL, chaperonin GroEL	535.088	0.00553046	0.00537954	-5.26378	-5.13816	-5.19447	-5.26663	-5.23668	-5.17437	0.597187	0.582544	0.814753	1.02805	0.972712
gi|158257318|	5	3	3	8	2	1	33400	unnamed protein product .IPPase, IPPase	292.982	0.000237935	0.000225938	-8.14689	-8.445	-8.47224	-7.67464	-8.90266	-9.4674	0.606013	0.577213	0.812599	1.0531	0.94958
gi|189065195|	18	14	14	17	17	12	19200	unnamed protein product .cyclophilin_ABH_like, cyclophilin_ABH_like: Cyclophilin A, B and H-like ...	168.421	0.00158389	0.0014803	-6.38022	-6.46997	-6.49721	-6.39886	-6.40311	-6.79349	0.610111	0.574749	0.811152	1.06998	0.934598
gi|189054550|	7	2	9	6	5	2	36000	unnamed protein product .LIM_CLP36, This family represents the LIM domain of CLP36PDZ_signaling, PDZ domain found in a variety of Eumetazoan signa...ZM, ZASP-like motif	315.789	0.000345234	0.000242248	-7.91169	-8.85644	-7.54867	-8.01787	-8.18917	-9.03154	0.614446	0.57215	0.811152	1.42513	0.701692
gi|189069266|	2	2	4	6	2	0	49200	unnamed protein product .RPT1, ATP-dependent 26S proteasome regulatory subunit [Posttrans...AAA, The AAA+ (ATPases Associated with a wide variety of cellula...	431.579	0.000125402	0.000116985	-9.32268	-9.16881	-8.60826	-8.33025	-9.29	-10.9533	0.616869	0.570701	0.811152	1.07195	0.932882
gi|20379034|	30	26	36	26	30	36	22700	RAB1A, small GTP binding protein RAB1A .Rab1_Ypt1, Rab GTPase family 1 includes the yeast homolog Ypt1PLN03108, Rab family protein	199.123	0.00265602	0.00244702	-6.04772	-6.03443	-5.7415	-6.15138	-6.01504	-5.88936	0.61732	0.570431	0.811152	1.08541	0.92131
gi|15618997|	7	1	6	5	3	1	21000	GPX7, glutathione peroxidase 7 precursor .GSH_Peroxidase, Glutathione (GSH) peroxidase family	184.211	0.000464204	0.000301289	-7.3727	-8.82826	-7.38917	-7.64593	-8.10216	-9.00336	0.61842	0.569775	0.811152	1.54073	0.649043
gi|189066594|	37	39	38	33	45	38	20500	unnamed protein product .COG1100, GTPase SAR1 and related small G proteins [General funct...Arf1_5_like, ADP-ribosylation factor-1 (Arf1) and ADP-ribosylati...	179.825	0.00363982	0.0034166	-5.73916	-5.53333	-5.58621	-5.81503	-5.51311	-5.73407	0.620563	0.568496	0.811152	1.06533	0.938673
gi|189065171|	10	3	14	9	6	4	11700	unnamed protein product .Ribosomal_P2, Ribosomal protein P2. This subfamily represents the ...	102.632	0.00155541	0.00105126	-6.45129	-7.39603	-6.00189	-6.51445	-6.89818	-7.31982	0.623629	0.566671	0.811152	1.47958	0.675869
gi|189053083|	21	15	41	20	26	17	15000	unnamed protein product .DED_PEA15, Death Effector Domain of Astrocyte phosphoprotein PEA...	131.579	0.00338802	0.00257124	-5.98308	-6.15642	-5.1988	-5.99378	-5.7413	-6.21016	0.623936	0.566488	0.811152	1.31766	0.758921
gi|189054434|	35	12	21	17	17	23	71400	unnamed protein product .ADF_drebrin_like, ADF homology domain of drebrin and actin-binding ...	626.316	0.000611598	0.000486492	-7.04184	-7.93178	-7.41669	-7.71225	-7.71649	-7.4756	0.634701	0.560112	0.806527	1.25716	0.795443
gi|5031635|	125	111	100	100	141	95	18500	CFL1, cofilin-1 .ADF_cofilin_like, Cofilin, Destrin, and related actin depolymerizing ...	162.281	0.0117136	0.0109011	-4.42854	-4.39295	-4.52406	-4.61377	-4.27587	-4.72295	0.635103	0.559875	0.806527	1.07454	0.930632
gi|189065172|	2	2	2	0	4	2	17400	unnamed protein product .zf-U1, U1 zinc finger	152.632	0.000278097	0.000256614	-8.28326	-8.12939	-8.15663	-9.85577	-7.66279	-8.30449	0.640321	0.556803	0.804554	1.08372	0.922752
gi|20379058|	12	15	12	12	12	15	23500	RAB6C, small GTP binding protein RAB6C .COG1100, GTPase SAR1 and related small G proteins [General funct...Rab6, Rab GTPase family 6 (Rab6)	206.14	0.00111684	0.00102439	-6.97435	-6.60537	-6.84772	-6.93743	-6.94167	-6.78047	0.641883	0.555886	0.804554	1.09026	0.917216
gi|189065440|	2	3	1	1	3	1	101500	unnamed protein product .FTHFS, Formyltetrahydrofolate synthetase (FTHFS) catalyzes the A...THF_DHG_CYH, Tetrahydrofolate dehydrogenase/cyclohydrolase, cata...FolD, 5,10-methylene-tetrahydrofolate dehydrogenase/Methenyl tet...NAD_bind_m-THF_DH_Cyclohyd, NADP binding domain of methylene-tetrahydrofolate ...	890.351	4.78547e-05	3.83614e-05	-10.0468	-9.5565	-10.431	-10.5207	-9.67769	-10.5789	0.641913	0.555868	0.804554	1.24747	0.801622
gi|158259727|	72	67	84	75	70	82	25000	unnamed protein product .PRX_1cys, Peroxiredoxin (PRX) family, 1-cys PRX subfamilyAhpC, Peroxiredoxin [Posttranslational modification, protein tur...	219.298	0.00579575	0.0054396	-5.27837	-5.19596	-4.99857	-5.2009	-5.27366	-5.17039	0.648135	0.552224	0.804554	1.06547	0.93855
gi|189054695|	107	90	61	75	88	84	28500	unnamed protein product .Tropomyosin, TropomyosinApoLp-III_like, Apolipophorin-III and similar insect proteins	250	0.00581883	0.00519445	-5.01549	-5.03376	-5.44731	-5.33193	-5.1773	-5.27746	0.653032	0.549368	0.804554	1.1202	0.892697
gi|41393475|	4	6	4	8	2	3	24400	KDELR2, unknown .ER_lumen_recept, ER lumen protein retaining receptor	214.035	0.000413017	0.000356323	-8.03358	-7.51199	-7.90695	-7.36067	-8.58869	-8.30613	0.663873	0.543082	0.804554	1.15911	0.862732
gi|47678261|	2	7	6	3	3	5	85400	ACO2, ACO2 .AcnA_Mitochondrial, Aconitase catalyzes the reversible isomerization of ...aconitase_mito, aconitate hydratase, mitochondrialAcnA_Mitochon_Swivel, Mitochondrial aconitase A swivel domain. Aconitase ...	749.123	0.000127866	8.67246e-05	-9.87413	-8.62165	-8.79199	-9.50074	-9.50498	-9.10691	0.664428	0.542761	0.804554	1.47439	0.678248
gi|189053888|	8	2	3	8	3	0	87300	unnamed protein product .ALDH_F18-19_ProA-GPR, Gamma-glutamyl phosphate reductase (GPR), aldehyde ...P5CS, delta l-pyrroline-5-carboxylate synthetaseAAK_P5CS_ProBA, AAK_P5CS_ProBA: Glutamate-5-kinase (G5K) domain of ...	765.789	0.000103346	8.68055e-05	-8.67236	-9.74227	-9.43303	-8.63544	-9.52698	-11.5268	0.673049	0.5378	0.804521	1.19054	0.839953
gi|189054053|	8	15	5	9	5	8	29200	unnamed protein product .proteasome_beta_type_4, proteasome beta type-4 subunit. The 20S proteasome, ...PRE1, 20S proteasome, alpha and beta subunits [Posttranslational...	256.14	0.000658993	0.000479104	-7.57718	-6.82254	-7.88587	-7.42903	-7.97982	-7.59841	0.676954	0.535564	0.802477	1.37547	0.727024
gi|189053613|	13	14	15	16	17	6	33300	unnamed protein product .Mito_carr, Mitochondrial carrier protein	292.105	0.000845185	0.000731818	-7.24595	-7.02062	-6.98116	-7.00835	-6.95375	-7.99806	0.679978	0.533837	0.801189	1.15491	0.865867
gi|189054967|	13	2	6	11	1	3	27300	unnamed protein product .Motile_Sperm, MSP (Major sperm protein) domain	239.474	0.000510984	0.000363134	-7.04728	-8.5798	-7.65153	-7.17069	-9.21182	-8.41843	0.683275	0.531958	0.801189	1.40715	0.710656
gi|189055333|	7	3	3	5	3	3	50200	unnamed protein product .AAA, The AAA+ (ATPases Associated with a wide variety of cellula...TIP49, DNA helicase TIP49, TBP-interacting protein [Transcriptio...	440.351	0.000181665	0.000148905	-8.24419	-8.85246	-8.8797	-8.51742	-8.97365	-9.02756	0.687068	0.529802	0.801189	1.22001	0.819665
gi|158256884|	9	9	16	6	15	9	19800	unnamed protein product .EFh (2&times;), EF-hand, calcium binding motifFRQ1, Ca2+-binding protein (EF-Hand superfamily) [Signal transdu...	173.684	0.00116393	0.000949317	-7.07747	-6.9236	-6.39877	-7.42003	-6.55524	-7.0987	0.690518	0.527847	0.801189	1.22607	0.815613
gi|170763479|	4	7	2	2	6	2	113200	MMS19, MMS19 nucleotide excision repair protein homolog isoform 1 .MMS19_N, Dos2-interacting transcription regulator of RNA-Pol-IIMMS19_C, RNAPII transcription regulator C-terminal	992.982	8.33088e-05	6.0895e-05	-9.56816	-8.90346	-10.0293	-10.119	-9.16775	-10.1772	0.694159	0.525789	0.801189	1.36807	0.730956
gi|41152506|	3	6	1	1	1	5	98500	PTGFRN, prostaglandin F2 receptor negative regulator precursor .IG_like (2&times;), Immunoglobulin likeIGv, Immunoglobulin V-TypeIg (2&times;), Immunoglobulin domain	864.035	7.60914e-05	5.05386e-05	-9.68037	-8.90746	-10.401	-10.4907	-10.495	-9.24962	0.694695	0.525487	0.801189	1.50561	0.664183
gi|62988777|	16	34	9	8	24	11	138500	COL3A1, unknown .Collagen (6&times;), Collagen triple helix repeat (20 copies)COLFI, Fibrillar collagens C-terminal domainVWC, von Willebrand factor type C domain	1214.91	0.000285828	0.000192152	-8.47059	-7.57912	-8.89603	-9.09696	-8.04259	-8.85283	0.694861	0.525393	0.801189	1.48751	0.672264
gi|189053608|	5	2	9	2	1	10	38400	unnamed protein product .eIF-5_eIF-2B, Domain found in IF2B/IF5	336.842	0.000293121	0.000220216	-8.28639	-8.92097	-7.61321	-9.03792	-9.55299	-7.66099	0.702314	0.521201	0.801189	1.33106	0.751279
gi|62089272|:reversed	3	2	1	0	3	2	100500		881.579	4.73605e-05	3.84011e-05	-9.70047	-9.88307	-10.4211	-11.6095	-9.66779	-10.0582	0.702769	0.520946	0.801189	1.23331	0.810826
gi|4507879|	51	32	44	41	34	49	30800	VDAC1, voltage-dependent anion-selective channel protein 1 .Porin3_VDAC, Voltage-dependent anion channel of the outer mitoch...	270.175	0.00266332	0.00242069	-5.82901	-6.13548	-5.84847	-6.00798	-6.19695	-5.88985	0.703812	0.520362	0.801189	1.10023	0.9089
gi|189065527|	7	7	2	7	1	4	55300	unnamed protein product .ALDH_F7_AASADH, NAD+-dependent alpha-aminoadipic semialdehyde de...	485.088	0.000202341	0.000145645	-8.34095	-8.18708	-9.31293	-8.30403	-9.9177	-8.873	0.708957	0.517486	0.800575	1.38928	0.719799
gi|189069177|	30	21	32	49	0	43	46100	unnamed protein product .DEADc, DEAD-box helicases. A diverse family of proteins involved...PTZ00424, helicase 45HELICc, Helicase superfamily c-terminal domain	404.386	0.00117594	0.00120139	-6.75617	-6.95197	-6.56602	-6.235	-10.8344	-6.42236	0.711696	0.515959	0.800575	0.978818	1.02164
gi|189069416|	6	2	15	2	5	6	21800	unnamed protein product .Commd9, COMM_Domain containing protein 9. The COMM Domain is fou...	191.228	0.000726367	0.000393737	-7.55319	-8.35483	-6.55752	-8.47177	-7.68756	-7.57442	0.71471	0.514283	0.800575	1.8448	0.542063
gi|189067296|	41	15	21	24	22	17	19400	unnamed protein product .PTZ00368, universal minicircle sequence binding protein (UMSBP)	170.175	0.00253801	0.0019886	-5.58266	-6.41364	-6.11367	-6.07276	-6.16215	-6.46738	0.729275	0.506241	0.794661	1.27628	0.78353
gi|158255644|	6	4	7	12	2	2	47000	unnamed protein product .Perilipin, Perilipin family	412.281	0.000252742	0.000224547	-8.32142	-8.53528	-8.05169	-7.63057	-9.24425	-9.29816	0.746465	0.49687	0.785417	1.12557	0.88844
gi|158261103|	4	5	4	0	5	7	80500	unnamed protein product .COG1287, Uncharacterized membrane protein, required for N-linked...STT3, Oligosaccharyl transferase STT3 subunit	706.14	0.000116693	9.86428e-05	-9.22726	-8.87272	-9.10063	-11.3876	-8.99391	-8.73766	0.752193	0.493777	0.784929	1.18299	0.845317
gi|189069130|	7	4	9	3	6	8	45200	unnamed protein product .thiolase, Thiolase are ubiquitous enzymes that catalyze the reve...PLN02644, acetyl-CoA C-acetyltransferase	396.491	0.000305223	0.000242158	-8.13927	-8.49623	-7.77625	-8.86449	-8.24969	-8.03534	0.759139	0.490045	0.784929	1.26043	0.79338
gi|111955084|:reversed	7	2	3	1	3	5	121800		1068.42	6.92593e-05	5.08177e-05	-9.13056	-10.0753	-9.76606	-10.7031	-9.86001	-9.46194	0.763839	0.487532	0.784091	1.3629	0.73373
gi|189065463|	16	3	11	13	2	5	25000	unnamed protein product .EMP24_GP25L, emp24/gp25L/p24 family/GOLD	219.298	0.000788791	0.000515359	-6.75859	-8.15532	-6.99298	-6.92234	-8.61298	-7.87844	0.769534	0.4845	0.783177	1.53057	0.653353
gi|5032069|	2	1	4	1	2	2	44400	SF3B4, splicing factor 3B subunit 4 .RRM2_SF3B4, RNA recognition motif 2 in splicing factor 3B subuni...RRM1_SF3B4, RNA recognition motif 1 in splicing factor 3B subuni...	389.474	0.000123557	8.69795e-05	-9.22003	-9.57698	-8.50561	-9.69393	-9.18735	-9.24126	0.773006	0.482659	0.781769	1.42053	0.70396
gi|189069153|	11	16	5	9	5	10	42800	unnamed protein product .NAP, Nucleosome assembly protein (NAP)	375.439	0.000506666	0.000353687	-7.65727	-7.14238	-8.26824	-7.8114	-8.36219	-7.76947	0.773188	0.482563	0.781769	1.43253	0.698067
gi|189053089|	16	10	5	8	6	10	25300	unnamed protein product .proteasome_beta_type_6, proteasome beta type-6 subunit. The 20S proteasome, ...20S_bact_beta, proteasome, beta subunit, bacterial type	221.93	0.000810824	0.00059823	-6.77052	-7.06864	-7.7425	-7.39689	-7.6694	-7.24374	0.774985	0.481612	0.781769	1.35537	0.737805
gi|189054985|	7	11	4	13	0	6	36200	unnamed protein product .PDI_a_ERp46 (2&times;), PDIa family, endoplasmic reticulum protein 46 (ERp4...Thioredoxin_like, Protein Disulfide Oxidoreductases and Other Pr...	317.544	0.000421425	0.000338299	-7.91723	-7.33592	-8.30143	-7.29252	-10.5926	-8.08156	0.777773	0.48014	0.781769	1.24572	0.802749
gi|189069191|	17	15	17	15	15	20	18500	unnamed protein product .ADF_cofilin_like, Cofilin, Destrin, and related actin depolymerizing ...	162.281	0.001757	0.00165326	-6.39865	-6.36614	-6.27202	-6.48309	-6.48733	-6.26165	0.778163	0.479934	0.781769	1.06275	0.940956
gi|62988737|	23	19	12	28	21	0	37200	PPP1CB, unknown .PTZ00480, serine/threonine-protein phosphataseMPP_PP1_PPKL, PP1, PPKL (PP1 and kelch-like) enzymes, and relat...	326.316	0.000952429	0.000823895	-6.80239	-6.8351	-7.30703	-6.57256	-6.85865	-10.6738	0.790916	0.473247	0.775856	1.15601	0.865047
gi|14150155|	4	1	7	4	1	2	20700	VPS25, vacuolar protein-sorting-associated protein 25 .ESCRT-II, ESCRT-II complex subunit	181.579	0.000418109	0.000245466	-7.86914	-8.81388	-7.23168	-7.83221	-8.93507	-8.47815	0.792125	0.472616	0.775856	1.70332	0.587087
gi|189067246|	4	1	1	3	1	0	29900	unnamed protein product .Pr_beta_C, Proteasome beta subunits C terminalPRE1, 20S proteasome, alpha and beta subunits [Posttranslational...proteasome_beta_type_7, proteasome beta type-7 subunit. The 20S proteasome, ...	262.281	0.000155927	0.000111199	-8.23686	-9.1816	-9.20884	-8.45125	-9.30279	-10.4553	0.795629	0.470793	0.775856	1.40223	0.71315
gi|71773329|	24	33	9	26	0	27	75800	ANXA6, annexin A6 isoform 1 .Annexin (8&times;), Annexin	664.912	0.000575116	0.000424913	-7.4725	-7.00576	-8.29325	-7.35711	-11.3316	-7.37822	0.799547	0.468762	0.774724	1.35349	0.738831
gi|189053075|	2	1	4	1	1	3	14400	unnamed protein product .PC4, Transcriptional Coactivator p15 (PC4)	126.316	0.000380968	0.000265979	-8.09402	-8.45097	-7.3796	-8.56792	-8.57216	-7.77877	0.806738	0.46505	0.772017	1.43233	0.698165
gi|62087740|	6	6	5	4	10	1	98800	brain glycogen phosphorylase variant, partial .GT1_Glycogen_Phosphorylase, This is a family of oligosaccharide phosphorylases. ...P_ylase, glycogen/starch/alpha-glucan phosphorylases	866.667	0.000120604	0.000100801	-9.06437	-8.9105	-9.1048	-9.39518	-8.55212	-10.5519	0.812094	0.462301	0.77027	1.19646	0.835801
gi|4501989|	10	12	23	8	11	17	68600		601.754	0.000442298	0.000323351	-8.22	-7.89177	-7.28774	-8.39438	-8.09634	-7.7304	0.82053	0.457997	0.769604	1.36786	0.731071
gi|241982780|	7	12	6	6	9	6	96700	PDCD6IP, programmed cell death 6-interacting protein isoform 2 .V_Alix, Middle V-domain of mammalian Alix and related domains ar...BRO1_Alix, Protein-interacting, N-terminal, Bro1-like domain of ...ALIX_LYPXL_bnd, ALIX V-shaped domain binding to HIVYppG, YppG-like protein	848.246	0.000178597	0.000138986	-8.89979	-8.23509	-8.91626	-9.00597	-8.63072	-9.06412	0.825704	0.455373	0.76947	1.285	0.778211
gi|189055146|	3	1	3	2	3	0	28200	unnamed protein product .ATP-synt_D, ATP synthase subunit D	247.368	0.00019173	0.000139293	-8.42964	-9.12306	-8.30301	-8.72919	-8.39696	-10.3968	0.830503	0.452949	0.768515	1.37646	0.726502
gi|47678731|	149	139	154	139	151	166	50100	TUBA8, TUBA8 .PTZ00335, tubulin alpha chainalpha_tubulin, The tubulin superfamily includes five distinct fa...	439.474	0.00570567	0.00543325	-5.2498	-5.16516	-5.09027	-5.28211	-5.20383	-5.16333	0.830914	0.452742	0.768515	1.05014	0.952254
gi|5453710|	18	5	13	16	5	5	29700	LASP1, LIM and SH3 domain protein 1 isoform a .SH3_Lasp1_C, C-terminal Src Homology 3 domain of LIM and SH3 dom...LIM_LASP, The LIM domain of LIM and SH3 Protein (LASP)Nebulin, Nebulin repeatNEBU, The Nebulin repeat is present also in Las1	260.526	0.000794306	0.000556442	-6.81646	-7.87561	-7.0049	-6.89394	-7.9968	-8.05071	0.832178	0.452106	0.768515	1.42747	0.700538
gi|62822174|	6	0	6	1	1	1	18600	PPIL3, unknown .cyclophilin, cyclophilin: cyclophilin-type peptidylprolyl cis- t...	163.158	0.000455816	0.000144201	-7.39444	-9.80552	-7.26781	-8.82385	-8.82809	-8.882	0.833995	0.451192	0.768515	3.16098	0.316358
gi|62822282|	17	16	22	22	18	8	26200	TSN, unknown .Translin, Translin family	229.825	0.00139372	0.00113639	-6.74664	-6.65161	-6.36869	-6.4584	-6.65839	-7.49	0.834096	0.451142	0.768515	1.22645	0.815361
gi|47678703|	12	11	9	16	8	4	41300	ST13, ST13 .STI1, Heat shock chaperonin-binding motifTPR, Tetratricopeptide repeat domainTPR_9, Tetratricopeptide repeatTPR_11, TPR repeat	362.281	0.000520926	0.000430258	-7.53821	-7.46772	-7.68602	-7.22366	-7.89119	-8.58109	0.842728	0.446822	0.768002	1.21073	0.825948
gi|5020253|	28	27	29	35	17	27	33300	REA, repressor of estrogen receptor activity .PHB, prohibitin homologuesSPFH_prohibitin, Prohibitin family	292.105	0.001656	0.00144089	-6.49873	-6.38058	-6.33761	-6.24218	-6.95375	-6.55568	0.842866	0.446754	0.768002	1.14929	0.870102
gi|193785180|	10	5	10	10	6	5	28800	unnamed protein product .TPR, Tetratricopeptide repeat domainCoatomer_E, Coatomer epsilon subunit	252.632	0.000586952	0.000468126	-7.35208	-7.84483	-7.22545	-7.31516	-7.79897	-8.01993	0.844009	0.446185	0.768002	1.25383	0.797554
gi|158260331|	15	12	12	14	15	5	32900	unnamed protein product .F-actin_cap_A, F-actin capping protein alpha subunit	288.596	0.000788854	0.000649463	-7.09571	-7.15695	-7.18419	-7.12548	-7.06303	-8.15303	0.851022	0.442704	0.768002	1.21462	0.8233
gi|42558279|	113	120	70	138	137	0	49700	TUBB8, tubulin beta-8 chain .beta_tubulin, The tubulin superfamily includes five distinct fam...PTZ00010, tubulin beta chain	435.965	0.0039408	0.00337699	-5.51728	-5.30356	-5.86684	-5.28129	-5.29278	-10.9635	0.851184	0.442623	0.768002	1.16696	0.856929
gi|24119203|	128	84	54	67	85	72	29000	TPM3, tropomyosin alpha-3 chain isoform 2 .Tropomyosin, TropomyosinApoLp-III_like, Apolipophorin-III and similar insect proteins	254.386	0.00584096	0.0046369	-4.85445	-5.11975	-5.58554	-5.46132	-5.22918	-5.44802	0.851598	0.442419	0.768002	1.25967	0.793859
gi|38201714|	15	6	6	9	6	6	36100	ELAVL1, ELAV-like protein 1 .ELAV_HUD_SF, ELAV/HuD family splicing factorRRM3_HuR, RNA recognition motif 3 in vertebrate Hu-antigen R (Hu...RRM2_HuR, RNA recognition motif 2 in vertebrate Hu-antigen R (Hu...RRM1_Hu, RNA recognition motif 1 in the Hu proteins family	316.667	0.000494674	0.000372511	-7.18853	-7.9037	-7.93094	-7.64116	-8.02489	-8.0788	0.861013	0.437783	0.768002	1.32794	0.753044
gi|62988906|	15	42	15	0	35	20	235000	CAD, unknown, partial .GATase1_CPSase, Small chain of the glutamine-dependent form of c...CAD_DHOase, The eukaryotic CAD protein is a trifunctional enzyme...CPSase_L_D3, Carbamoyl-phosphate synthetase large chain, oligome...ATP-grasp_4 (2&times;), ATP-grasp domainpyrB, aspartate carbamoyltransferase catalytic subunitCPSaseII_lrg, carbamoyl-phosphate synthase, large subunitPyrC, Dihydroorotase and…	2061.4	0.00020623	0.000142875	-9.06182	-7.89929	-8.93519	-12.4589	-8.20045	-8.80347	0.861204	0.437689	0.768002	1.44343	0.692792
gi|189053114|	3	3	5	1	4	4	20400	unnamed protein product .COG1100, GTPase SAR1 and related small G proteins [General funct...Arl1, ADP ribosylation factor 1 (Arf1)	178.947	0.000397319	0.00030497	-8.10585	-7.95198	-7.52723	-8.91623	-7.82185	-7.87576	0.866084	0.435302	0.768002	1.30282	0.767569
gi|189053065|	2	2	4	2	4	0	20800	unnamed protein product .NDUFB10, NADH-ubiquinone oxidoreductase subunit 10	182.456	0.000296623	0.000217972	-8.46174	-8.30787	-7.74732	-8.42482	-7.84127	-10.0924	0.86633	0.435182	0.768002	1.36083	0.734845
gi|62822514|	8	15	26	7	17	10	24700	EEF1B2, unknown .EF1B, Elongation factor 1 beta (EF1B) guanine nucleotide exchang...GST_C_eEF1b_like, Glutathione S-transferase C-terminal-like, alpha ...EF-1_beta_acid, Eukaryotic elongation factor 1 beta central acidic ...	216.667	0.00134481	0.000857909	-7.40982	-6.65517	-6.14611	-7.49806	-6.655	-7.21974	0.874084	0.431412	0.768002	1.56755	0.637939
gi|58530840|	8	12	2	0	7	6	331600	DSP, desmoplakin isoform I .Myosin_tail_1, Myosin tailPlectin (8&times;), Plectin repeatPLEC (4&times;), Plectin repeatApoLp-III_like, Apolipophorin-III and similar insect proteinsSPEC (2&times;), Spectrin repeats, found in several proteins involved in cy...	2908.77	4.58227e-05	2.58694e-05	-10.0069	-9.46741	-11.1041	-12.8032	-10.0994	-10.2964	0.878273	0.429386	0.768002	1.77131	0.564555
gi|158257456|	9	11	10	11	13	0	102300	unnamed protein product NBD_sugar-kinase_HSP70_actin (2&times;), Nucleotide-Binding Domain of the sugar ...PTZ00107, hexokinaseHexokinase_2 (2&times;), Hexokinase	897.368	0.000199617	0.000151133	-8.7197	-8.37477	-8.49298	-8.49172	-8.33562	-11.6854	0.889531	0.423982	0.768002	1.32081	0.757113
gi|62702364|	7	9	6	7	3	9	48000	BZW1, unknown .W2_eIF5C_like, C-terminal W2 domain of the eukaryotic translation ...	421.053	0.000317059	0.000252825	-8.19938	-7.80912	-8.21585	-8.16245	-8.92883	-7.98422	0.889965	0.423774	0.768002	1.25407	0.797405
gi|189065534|	40	37	26	38	30	28	24400	unnamed protein product .Ran, Ras-related nuclear proteins (Ran)/TC4 family of small GTPa...RAN, Ran (Ras-related nuclear proteins) /TC4 subfamily of small ...	214.035	0.00274681	0.00238753	-5.83636	-5.75945	-6.13389	-5.85008	-6.08725	-6.20899	0.893828	0.421933	0.768002	1.15048	0.869199
gi|189065215|	23	28	15	14	27	15	19900	unnamed protein product .GATase1_DJ-1, Type 1 glutamine amidotransferase (GATase1)-like d...not_thiJ, DJ-1 family protein	174.561	0.00219	0.00172746	-6.1768	-5.83002	-6.46633	-6.62273	-5.98693	-6.61419	0.895107	0.421325	0.768002	1.26776	0.788792
gi|189054857|	25	22	32	38	0	28	32800	unnamed protein product .PTZ00169, ADP/ATP transporter on adenylate translocaseMito_carr (3&times;), Mitochondrial carrier protein	287.719	0.00158424	0.00122203	-6.59483	-6.56612	-6.22564	-6.14593	-10.494	-6.50483	0.895805	0.420994	0.768002	1.2964	0.771364
gi|194381348|	11	8	7	9	9	6	130700	unnamed protein product ACE1-Sec16-like, Ancestral coatomer element 1 (ACE1) of COPII coat ...WD40, WD40 domain, found in a number of eukaryotic proteins that...	1146.49	0.000134244	0.000116794	-8.77364	-8.92205	-9.07445	-8.92777	-8.93201	-9.36541	0.896654	0.420591	0.768002	1.14941	0.870015
gi|158259253|	6	7	5	3	4	9	32900	unnamed protein product .F1-ATPase_gamma, mitochondrial ATP synthase gamma subunit	288.596	0.000382962	0.000313312	-7.96475	-7.66778	-8.00517	-8.54686	-8.29979	-7.60649	0.903357	0.41742	0.765962	1.2223	0.818127
gi|42476296|	113	84	53	76	75	64	32800	TPM2, tropomyosin beta chain isoform 1 .Tropomyosin, TropomyosinTropomyosin_1, Tropomyosin like	287.719	0.00487585	0.00394194	-5.1017	-5.24288	-5.72719	-5.45929	-5.47669	-5.68807	0.906069	0.416143	0.765962	1.23692	0.808462
gi|189053146|	26	19	31	19	22	29	14500	unnamed protein product .Ribosomal_L7Ae, Ribosomal protein L7Ae/L30e/S12e/Gadd45 family	127.193	0.00343673	0.00292586	-5.74008	-5.89294	-5.44061	-6.00989	-5.87103	-5.65407	0.91306	0.412866	0.764898	1.17461	0.851348
gi|4501881|	371	339	214	371	0	415	42000	ACTA1, actin, alpha skeletal muscle .NBD_sugar-kinase_HSP70_actin, Nucleotide-Binding Domain of the sugar ...Actin, Actin	368.421	0.0141119	0.0110665	-4.1632	-4.0994	-4.58581	-4.12628	-10.7412	-4.07249	0.91496	0.411979	0.764898	1.2752	0.784191
gi|189053973|	8	1	8	1	4	3	24700	unnamed protein product	216.667	0.000472286	0.00022864	-7.40982	-8.99054	-7.28318	-9.10749	-8.01312	-8.31835	0.91611	0.411443	0.764898	2.06563	0.484113
gi|189053267|	3	1	3	4	1	0	22100	unnamed protein product .BVR-B_like_SDR_a, biliverdin IX beta reductase (BVR-B, aka flavin ...WcaG, Nucleoside-diphosphate-sugar epimerases [Cell envelope bio...	193.86	0.000244651	0.000177973	-8.18589	-8.87932	-8.05926	-7.89766	-9.00051	-10.153	0.918493	0.410334	0.764898	1.37466	0.727455
gi|47678553|	3	1	13	3	2	1	14700	LGALS1, LGALS1 .GLECT, Galectin/galactose-binding lectin. This domain exclusivel...	128.947	0.000820491	0.000306436	-7.77816	-8.47159	-6.30161	-7.74124	-8.08195	-8.64669	0.923867	0.407843	0.764898	2.67753	0.373478
gi|62198449|	8	13	7	2	17	4	243300	FN1, unknown, partial .FN2 (2&times;), Fibronectin Type II domain: FN2 is one of three types of in...FN1 (10&times;), Fibronectin type 1 domain, approximately 40 residue long wi...fn3, Fibronectin type III domainFN3 (13&times;), Fibronectin type 3 domain	2134.21	7.89389e-05	6.04388e-05	-9.69731	-9.08081	-9.69584	-10.8842	-8.94249	-10.3545	0.925681	0.407005	0.764898	1.3061	0.765639
gi|189065138|	4	6	5	3	9	0	15400	unnamed protein product .Got1, Got1/Sft2-like family	135.088	0.000697601	0.000530586	-7.57337	-7.05177	-7.24607	-7.78776	-6.79347	-9.79182	0.931998	0.404097	0.764306	1.31478	0.760586
gi|13183088|	2	5	5	3	5	0	34500		302.632	0.000257584	0.000166607	-8.96775	-8.02542	-8.05266	-8.59435	-8.14661	-10.5984	0.938129	0.401292	0.760559	1.54606	0.646805
gi|62822344|	18	22	19	18	23	12	36400	MDH1, unknown .MalateDH-SF1, malate dehydrogenaseMDH_cytoplasmic_cytosolic, Cytoplasmic and cytosolic Malate dehydrogenases	319.298	0.00107715	0.000897383	-7.01988	-6.67026	-6.8406	-6.98295	-6.74797	-7.43315	0.938517	0.401115	0.760559	1.20033	0.833105
gi|150261542|	2	3	6	1	1	6	20900	Chain A, Ensemble Refinement Of The Crystal Structure Of Uncharacterized Protein Loc79017 From Homo Sapiens.Domain 1, NCBI DomainsDomain 2, NCBI DomainsGGCT_like, GGCT-like domains, also called AIG2-like family. Gamm...	183.333	0.000391601	0.000265647	-8.46654	-7.97619	-7.38439	-8.94044	-8.94468	-7.53225	0.938724	0.401021	0.760559	1.47414	0.678362
gi|166706897|	1	2	3	3	1	0	52800		463.158	9.31445e-05	6.29707e-05	-9.90412	-9.23943	-8.9302	-9.0199	-9.87144	-11.024	0.947469	0.39705	0.760559	1.47917	0.676054
gi|189055017|	7	7	9	9	8	0	50700	unnamed protein product .DDOST_48kD, Oligosaccharyltransferase 48 kDa subunit beta	444.737	0.000312574	0.00022121	-8.2541	-8.10023	-7.89108	-7.98079	-8.09626	-10.9834	0.949924	0.395941	0.760559	1.41302	0.707702
gi|158257894|	3	1	4	3	0	2	30800	unnamed protein product .Apolipoprotein, Apolipoprotein A1/A4/E domain	270.175	0.000197151	0.000125553	-8.51783	-9.21126	-8.13988	-8.48091	-10.4311	-8.87553	0.950394	0.39573	0.760559	1.57026	0.636839
gi|5531904|	30	17	17	8	14	31	19300	SFRS3, pre-mRNA splicing factor .COG0724, RNA-binding proteins (RRM domain) [General function pre...RRM_SF, RNA recognition motif (RRM) superfamily	169.298	0.00214995	0.00165984	-5.88546	-6.28711	-6.31435	-7.12619	-6.59635	-5.87443	0.952764	0.394663	0.760559	1.29527	0.772038
gi|88953571|	176	168	101	173	154	0	121200	POTEI, PREDICTED: POTE ankyrin domain family member I isoform 2 .NBD_sugar-kinase_HSP70_actin, Nucleotide-Binding Domain of the sugar ...Ank_4, Ankyrin repeats (many copies)ANK (2&times;), ankyrin repeatsActin, ActinAnk_2 (2&times;), Ankyrin repeats (3 copies)	1063.16	0.00236177	0.00164543	-5.9672	-5.85971	-6.39383	-5.94742	-6.06764	-11.8549	0.962597	0.390261	0.758338	1.43535	0.696695
gi|194390980|	1	4	1	0	4	0	17500		153.509	0.00028313	0.00018955	-8.79981	-7.54733	-8.67318	-9.8615	-7.66852	-9.91966	0.962829	0.390157	0.758338	1.4937	0.66948
gi|158254478|	7	13	5	6	10	1	87800	unnamed protein product .GlnRS_core, catalytic core domain of glutaminyl-tRNA synthetasetRNA_synt_1c_R2, Glutaminyl-tRNA synthetase, non-specific RNA bi...tRNA_synt_1c_R1, Glutaminyl-tRNA synthetase, non-specific RNA bi...tRNA-synt_1c_C, tRNA synthetases class I (E and Q), anti-codon b...PLN02859, glutamine-tRNA ligase	770.175	0.00019691	0.000127287	-8.80324	-8.06158	-8.98676	-8.90941	-8.43408	-10.4339	0.963576	0.389825	0.758338	1.54697	0.646424
gi|189055114|	1	3	4	1	4	0	20700	unnamed protein product .TB2_DP1_HVA22, TB2/DP1, HVA22 family	181.579	0.000302768	0.000189636	-8.96775	-7.96658	-7.7425	-8.93082	-7.83645	-10.0876	0.966484	0.388532	0.758338	1.59657	0.626343
gi|189053735|	12	7	13	11	11	1	27700	unnamed protein product .PTZ00253, tryparedoxin peroxidasePRX_Typ2cys, Peroxiredoxin (PRX) family, Typical 2-Cys PRX subfa...	242.982	0.000774035	0.000535137	-7.13878	-7.49574	-6.93519	-7.18524	-7.18948	-9.28027	0.969971	0.386987	0.758338	1.44642	0.691361
gi|4502101|	116	106	127	115	122	113	38700	ANXA1, annexin A1 .Annexin (4&times;), Annexin	339.474	0.00583911	0.00541647	-5.24103	-5.1769	-5.02417	-5.21272	-5.15813	-5.28834	0.970286	0.386848	0.758338	1.07803	0.927619
gi|63994165|	3	2	4	1	5	1	88700	FLJ10808, unknown, partial .Ube1_repeat2, Ubiquitin activating enzyme (E1), repeat 2. E1, a ...NADB_Rossmann (3&times;), Rossmann-fold NAD(P)(+)-binding proteins	778.07	7.61675e-05	5.75561e-05	-9.57558	-9.75818	-9.19763	-10.386	-9.09091	-10.4441	0.98233	0.381554	0.75574	1.32336	0.755651
gi|158254636|	12	5	11	9	8	4	47400	unnamed protein product .RPN6, 26S proteasome regulatory complex component [Posttranslati...PCI, PCI domain	415.789	0.000395406	0.000285047	-7.67597	-8.34308	-7.63272	-7.91349	-8.02895	-8.71885	0.987676	0.379225	0.75574	1.38716	0.720898
gi|189054620|	8	8	12	7	11	6	26600	unnamed protein product .IF6, Ribosome anti-association factor IF6 binds the large riboso...	233.333	0.00071857	0.000573677	-7.48392	-7.33005	-6.97163	-7.57216	-7.14896	-7.77342	0.990702	0.377912	0.75574	1.25257	0.798359
gi|189053418|	6	7	6	6	0	8	34700	unnamed protein product .Pribosyltran_N, N-terminal domain of ribose phosphate pyrophosph...PRTases_typeI, Phosphoribosyl transferase (PRT)-type I domainPrsA, Phosphoribosylpyrophosphate synthetase [Nucleotide transpo...	304.386	0.000382274	0.000263284	-8.01802	-7.72104	-7.89138	-7.98109	-10.5503	-7.77098	0.992233	0.377249	0.75574	1.45195	0.68873
gi|189065517|	6	4	10	7	3	5	79600	unnamed protein product .fabG, 3-ketoacyl-(acyl-carrier-protein) reductaseHDE_HSD, HDE_HSD The R-hydratase-like hot dog fold of the 17-be...SCP2, SCP-2 sterol transfer familyPLN02864, enoyl-CoA hydratasehot_dog, The hotdog fold was initially identified in the E. coli...hydroxyacyl-CoA-like_DH_SDR_c-like, (3R)-hydroxyacyl-CoA dehydrogenase-like, ...	698.246	0.000174312	0.000123614	-8.84829	-9.06214	-8.24209	-8.66827	-9.43465	-9.03657	0.99517	0.37598	0.75574	1.41013	0.709154
gi|47678571|	7	8	9	4	8	9	12500	MIF, MIF .MIF, Macrophage migration inhibitory factor (MIF)	109.649	0.00132251	0.00106715	-6.8539	-6.57487	-6.49088	-7.32781	-6.69606	-6.63874	1.00459	0.371935	0.754498	1.23929	0.806915
gi|158257714|	30	34	33	28	22	40	38200	unnamed protein product .PCBP_like_KH (2&times;), K homology RNA-binding domain, PCBP_like. Members ...KH-I, K homology RNA-binding domain, type I. KH binds single-st...	335.088	0.00166927	0.00141921	-6.56819	-6.29108	-6.34774	-6.59909	-6.83972	-6.30584	1.0183	0.366116	0.746667	1.17619	0.8502
gi|189053237|	22	31	32	27	0	32	20500	unnamed protein product .COG1100, GTPase SAR1 and related small G proteins [General funct...Arf1_5_like, ADP-ribosylation factor-1 (Arf1) and ADP-ribosylati...	179.825	0.00274921	0.00174081	-6.24999	-5.75964	-5.75563	-6.01239	-10.024	-5.90349	1.01898	0.365827	0.746667	1.57926	0.633206
gi|189502784|	177	172	163	171	175	0	60600	HSPD1, mitochondrial heat shock 60kD protein 1 variant 1 .GroEL, GroEL_like type I chaperonin. Chaperonins are involved in...groEL, chaperonin GroEL	531.579	0.00545916	0.00348071	-5.2684	-5.1431	-5.22393	-5.26587	-5.24705	-11.1617	1.0225	0.364349	0.746667	1.56841	0.63759
gi|5031857|	65	75	68	67	0	78	36700	LDHA, L-lactate dehydrogenase A chain isoform 1 .L-LDH-NAD, L-lactate dehydrogenaseLDH_1, A subgroup of L-lactate dehydrogenases	321.93	0.00369518	0.00235486	-5.76381	-5.46785	-5.59239	-5.6968	-10.6063	-5.60399	1.02414	0.363662	0.746667	1.56917	0.637279
gi|189053606|	4	2	3	3	3	0	36500		320.175	0.000182929	0.000124285	-8.43631	-8.87023	-8.561	-8.6507	-8.65495	-10.6548	1.02643	0.362705	0.746667	1.47185	0.679416
gi|189069240|	4	3	18	6	2	3	32100	unnamed protein product .PNPH, purine nucleoside phosphorylase I, inosine and guanosine-s...Pnp, Purine nucleoside phosphorylase [Nucleotide transport and m...	281.579	0.00054026	0.000232947	-8.30786	-8.4053	-6.76753	-7.90321	-8.86296	-8.5804	1.0331	0.359922	0.746667	2.31924	0.431175
gi|189053884|	8	9	10	3	12	7	26400	unnamed protein product .PRK03996, proteasome subunit alphaproteasome_alpha_type_5, proteasome_alpha_type_5. The 20S proteasome, ...	231.579	0.000699504	0.000530537	-7.47638	-7.21128	-7.13844	-8.32676	-7.05803	-7.62277	1.03344	0.359783	0.746667	1.31848	0.758448
gi|189053605|	7	5	5	1	7	5	39200	unnamed protein product .PLN02683, pyruvate dehydrogenase E1 component subunit betaTPP_PYR_E1-PDHc-beta_like, Pyrimidine (PYR) binding domain of the beta ...Transketolase_C, Transketolase, C-terminal domain	343.86	0.000301483	0.000219711	-7.99685	-8.15314	-8.18038	-9.56937	-7.96417	-8.32824	1.04339	0.355675	0.746109	1.37218	0.728769
gi|158259849|	7	20	7	10	8	2	100800	unnamed protein product, partial TMPIT, TMPIT-like proteinSYCE1, Synaptonemal complex central element protein 1GluZincin, Peptidase Gluzincin family (thermolysin-like proteina...KISc_KHC_KIF5, Kinesin motor domain, kinesin heavy chain (KHC) or ...	884.211	0.000232205	0.000128687	-8.94131	-7.78192	-8.81468	-8.56792	-8.78347	-10.0612	1.05327	0.351637	0.741007	1.80442	0.554194
gi|20379070|	18	17	26	20	20	10	24500	RAB11B, small GTP binding protein RAB11B .PLN03110, Rab GTPaseRab11_like, Rab GTPase family 11 (Rab11)-like includes Rab11a, R...	214.912	0.00165092	0.00126188	-6.62398	-6.52568	-6.13798	-6.4844	-6.48865	-7.21161	1.05433	0.351203	0.741007	1.30829	0.764354
gi|20379066|	23	18	19	21	16	22	22500	RAB10, small GTP binding protein RAB10 .PLN03108, Rab family proteinRab8_Rab10_Rab13_like, Rab GTPase families 8, 10, 13 (Rab8, Rab10, Rab13)	197.368	0.00175132	0.00159952	-6.29959	-6.38495	-6.35955	-6.35162	-6.62055	-6.36431	1.0688	0.34537	0.73791	1.0949	0.913323
gi|158254448|	2	4	1	0	0	5	23700	unnamed protein product .SAP, Putative DNA-binding (bihelical) motif predicted to be invo...	207.895	0.000233801	0.000158816	-8.59226	-7.8506	-8.97646	-10.1648	-10.169	-7.82503	1.07727	0.341996	0.73581	1.47215	0.679279
gi|62702265|	38	27	37	26	31	39	37500	PCBP1, unknown .PCBP_like_KH (2&times;), K homology RNA-binding domain, PCBP_like. Members ...KH-I, K homology RNA-binding domain, type I. KH binds single-st...	328.947	0.00176884	0.00154333	-6.31676	-6.49936	-6.21645	-6.65335	-6.48475	-6.31235	1.08279	0.33981	0.732814	1.14611	0.872515
gi|47678327|	5	1	2	2	2	0	12400	bK223H9.2, bK223H9.2 .PHF5, PHF5-like protein	108.772	0.000476931	0.000267926	-7.15603	-8.30144	-7.81785	-7.90756	-7.9118	-9.57515	1.09206	0.336171	0.731989	1.78009	0.561771
gi|189053656|	8	1	8	5	2	0	24700	unnamed protein product .Sod_Fe_C, Iron/manganese superoxide dismutases, C-terminal domai...Sod_Fe_N, Iron/manganese superoxide dismutases, alpha-hairpin do...SodA, Superoxide dismutase [Inorganic ion transport and metaboli...	216.667	0.000472286	0.000208393	-7.40982	-8.99054	-7.28318	-7.80821	-8.60091	-10.2643	1.09697	0.334259	0.731093	2.26632	0.441244
gi|189066665|	8	1	3	3	2	0	22600	unnamed protein product .Prefoldin_alpha, Prefoldin alpha subunit	198.246	0.00036895	0.000173921	-7.32096	-8.90169	-8.08163	-8.17134	-8.51206	-10.1754	1.10706	0.330359	0.729109	2.12136	0.471396
gi|189053891|	12	4	5	7	4	3	32400	unnamed protein product .PDZ_signaling (2&times;), PDZ domain found in a variety of Eumetazoan signa...	284.211	0.000434129	0.000286959	-7.29551	-8.16329	-7.98986	-7.76941	-8.28448	-8.5897	1.11512	0.327275	0.726142	1.51286	0.661001
gi|189053542|	9	8	11	0	8	10	59000	unnamed protein product .nondecarbox_cond_enzymes, nondecarboxylating condensing enzymesSCP2, SCP-2 sterol transfer familyPRK08256, lipid-transfer protein	517.544	0.000322624	0.000194576	-8.16932	-8.12668	-7.85164	-11.0768	-8.24787	-8.09047	1.11667	0.326683	0.726142	1.65809	0.603105
gi|22538435|	7	8	11	10	3	7	37800	CTSB, cathepsin B preproprotein .Peptidase_C1A_CathepsinB, Cathepsin B groupPropeptide_C1, Peptidase family C1 propeptide	331.579	0.000472546	0.000338959	-7.96048	-7.68145	-7.40641	-7.58709	-8.68994	-7.98171	1.12043	0.325256	0.725148	1.39411	0.717305
gi|24895280|	1	3	9	4	1	0	78300	LTF, lactotransferrin precursor .TR_FER, TransferrinTransferrin, Transferrin	686.842	0.000122535	5.02324e-05	-10.2982	-9.29699	-8.3257	-9.16263	-10.2655	-11.418	1.12728	0.322667	0.722846	2.43936	0.409943
gi|38176300|	59	46	44	53	48	32	177300	NES, nestin .Filament, Intermediate filament protein	1555.26	0.000543114	0.000454488	-7.43495	-7.5276	-7.5988	-7.50432	-7.60668	-8.06091	1.1466	0.315474	0.720749	1.195	0.836818
gi|189054568|	6	5	6	6	5	6	51700	unnamed protein product .WD40, WD40 domain, found in a number of eukaryotic proteins that...CDC55, Serine/threonine protein phosphatase 2A, regulatory subun...	453.509	0.000230121	0.000213092	-8.41673	-8.42992	-8.2901	-8.37981	-8.55111	-8.43796	1.15144	0.313693	0.719004	1.07992	0.925997
gi|332356380|	73	86	103	0	72	71	66500	albumin, partial .ALBUMIN (3&times;), Albumin domain, contains five or six internal disulphid...	583.333	0.00257317	0.00128213	-6.243	-5.92626	-5.77408	-11.1965	-6.22401	-6.29181	1.16397	0.309129	0.713315	2.00694	0.49827
gi|109148508|	5	6	11	6	6	0	31300	OTUB1, ubiquitin thioesterase OTUB1 .Peptidase_C65, Peptidase C65 Otubain	274.561	0.000489521	0.000261302	-8.08195	-7.76102	-7.21772	-7.87797	-7.88221	-10.5011	1.17322	0.305801	0.710563	1.87339	0.533791
gi|158254948|	3	4	2	7	0	0	54500	unnamed protein product .PRK10879, proline aminopeptidase P IIAMP_N, Aminopeptidase P, N-terminal domainProlidase, Prolidase. E.C. 3.4.13.9. Also known as Xaa-Pro dipep...	478.07	0.000124639	9.45407e-05	-9.08852	-8.68333	-9.29836	-8.28945	-11.0017	-11.0557	1.17331	0.305768	0.710563	1.31836	0.758518
gi|189069172|	4	2	2	4	1	0	38000	unnamed protein product .DnaJ_C, C-terminal substrate binding domain of DnaJ and HSP40DnaJ, DnaJ-class molecular chaperone with C-terminal Zn finger d...DnaJ, DnaJ domain or J-domain. DnaJ/Hsp40 (heat shock protein 4...	333.333	0.000158196	0.000103505	-8.47659	-8.9105	-8.93774	-8.43966	-9.54252	-10.695	1.17378	0.305602	0.710563	1.52839	0.654283
gi|397140228|	7	2	9	0	0	14	12900	LOC100996747, PREDICTED: 40S ribosomal protein S26-like .PTZ00172, 40S ribosomal protein S26Ribosomal_S26e, Ribosomal protein S26e	113.158	0.000963445	0.000692228	-6.8854	-7.83014	-6.52238	-9.55653	-9.56077	-6.24739	1.17516	0.305108	0.710563	1.3918	0.718492
gi|158256440|	2	3	3	3	0	2	76700	unnamed protein product .GATase1_GMP_Synthase, Type 1 glutamine amidotransferase (GATase1) domain ...guaA, GMP synthaseGMP_synt_C, GMP synthase C terminal domainGMP_synthase_C, The C-terminal domain of GMP synthetase. It cont...	672.807	8.06798e-05	5.04177e-05	-9.76669	-9.27635	-9.30359	-9.39329	-11.3434	-9.78792	1.17825	0.304004	0.710563	1.60023	0.624911
gi|189069206|	4	4	7	5	4	2	20700	unnamed protein product .Glyoxalase_I, Glyoxalase I catalyzes the isomerization of the he...	181.579	0.000517213	0.000362648	-7.86914	-7.71526	-7.23168	-7.63154	-7.83645	-8.47815	1.17998	0.303391	0.710563	1.42621	0.701158
gi|8923659|	4	3	1	2	2	0	24200		212.281	0.000249167	0.000137284	-8.02535	-8.1228	-8.99733	-8.57622	-8.58046	-10.2438	1.18302	0.302309	0.710563	1.81497	0.550973
gi|189055341|	14	8	21	10	12	9	26200	unnamed protein product .SGS, SGS domainp23_CacyBP, p23_like domain found in proteins similar to Calcycl...Siah-Interact_N, Siah interacting protein, N terminal	229.825	0.00109239	0.000740937	-6.93469	-7.3149	-6.41415	-7.22054	-7.05043	-7.37878	1.1833	0.302212	0.710563	1.47434	0.67827
gi|63252900|	174	134	86	110	124	85	32900	TPM1, tropomyosin alpha-1 chain isoform 4 .Tropomyosin, TropomyosinTropomyosin_1, Tropomyosin like	288.596	0.00765478	0.00582723	-4.67463	-4.78112	-5.24978	-5.09461	-4.97956	-5.40926	1.18724	0.300818	0.710563	1.31362	0.761253
gi|20379036|	38	12	22	18	20	4	23500	RAB2A, small GTP binding protein RAB2A .Rab2, Rab GTPase family 2 (Rab2)	206.14	0.00196138	0.00111726	-5.84942	-6.82048	-6.25993	-6.54538	-6.44697	-8.01723	1.19406	0.298424	0.710563	1.75553	0.569629
gi|189069163|	18	21	19	25	12	10	37300	unnamed protein product WD40, WD40 domain, found in a number of eukaryotic proteins that...	327.193	0.00103283	0.000780475	-7.0443	-6.74015	-6.86503	-6.68647	-7.40366	-7.63193	1.19896	0.296713	0.710563	1.32334	0.755665
gi|189054611|	12	12	7	12	5	7	36100	unnamed protein product .Apolipoprotein, Apolipoprotein A1/A4/E domain	316.667	0.000578039	0.000422185	-7.40364	-7.24977	-7.78784	-7.36672	-8.19194	-7.9357	1.20358	0.29511	0.710563	1.36916	0.730376
gi|72534670|	2	1	3	2	1	1	87100	PLAA, phospholipase A-2-activating protein PUL, PUL domain	764.035	5.53445e-05	3.77783e-05	-9.89384	-10.2508	-9.43074	-9.85692	-10.372	-10.4259	1.20446	0.294804	0.710563	1.46498	0.682602
gi|62702288|	14	14	17	16	13	5	34300	ARPC2, unknown .P34-Arc, Arp2/3 complex, 34 kD subunit p34-Arc	300.877	0.000876438	0.000623104	-7.20408	-7.0502	-6.88939	-7.03794	-7.24285	-8.1947	1.2071	0.293894	0.710563	1.40657	0.710951
gi|189067527|	2	5	1	1	1	2	26000		228.07	0.000239419	0.000125235	-8.68488	-7.74256	-9.06908	-9.15879	-9.16303	-8.70611	1.20899	0.293239	0.710563	1.91175	0.52308
gi|62822315|	3	4	7	4	3	3	36100	ANXA4, unknown .Annexin (4&times;), Annexin	316.667	0.000280333	0.000190213	-8.67661	-8.27142	-7.78784	-8.38837	-8.64393	-8.69784	1.20932	0.293128	0.710563	1.47379	0.678524
gi|158255710|	5	2	2	0	3	2	23300	unnamed protein product .Reticulon, Reticulon	204.386	0.000283166	0.000165636	-7.78678	-8.42137	-8.44861	-10.1478	-8.20609	-8.59647	1.2113	0.292447	0.710563	1.70957	0.584943
gi|189069254|	1	4	3	1	0	3	22200	unnamed protein product .Chromo_shadow, Chromo shadow domainCHROMO, Chromatin organization modifier (chromo) domain is a con...	194.737	0.000283138	0.00014524	-9.03771	-7.78522	-8.06378	-9.00078	-10.1036	-8.21164	1.21365	0.291641	0.710563	1.94945	0.512965
gi|4503725|	6	10	12	6	9	0	11900	FKBP1A, peptidyl-prolyl cis-trans isomerase FKBP1A isoform a .FKBP_C, FKBP-type peptidyl-prolyl cis-trans isomeraseFkpA, FKBP-type peptidyl-prolyl cis-trans isomerases 1 [Posttran...	104.386	0.00162261	0.000840005	-6.94782	-6.31437	-6.16726	-6.91089	-6.53564	-9.53399	1.21645	0.290684	0.710563	1.93166	0.517689
gi|5803227|	45	71	61	43	46	60	27700	YWHAQ, 14-3-3 protein theta .14-3-3_theta, 14-3-3 theta/tau (theta in mice, tau in human), an ...	242.982	0.00420556	0.00322589	-5.8468	-5.24094	-5.41884	-5.85483	-5.79238	-5.5831	1.22035	0.289354	0.710563	1.30369	0.767053
gi|195963398|	7	8	3	8	2	1	41000	SUGT1, suppressor of G2 allele of SKP1 homolog isoform SGT1B .SGS, SGS domainTPR, Tetratricopeptide repeat domainp23_CS_hSgt1_like, p23_like domain similar to the C-terminal CS ...PLN03088, SGT1, suppressor of G2 allele of SKP1	359.649	0.000305822	0.000184057	-8.04175	-7.76271	-8.67726	-7.87966	-9.10768	-9.67241	1.22147	0.288972	0.710563	1.66156	0.601843
gi|189054948|	4	4	3	3	4	1	81800	unnamed protein product .EFh (2&times;), EF-hand, calcium binding motifCysPc, Calpains, domains IIa, IIbPTZ00184, calmodulinCalpain_III, Calpain, subdomain III. Calpains are calcium-activa...EF-hand_8, EF-hand domain pair	717.544	9.83441e-05	6.98795e-05	-9.24328	-9.08941	-9.36796	-9.45767	-9.2106	-10.3631	1.23396	0.284762	0.710563	1.40734	0.710562
gi|91718899|	9	2	7	0	2	7	43100	MAPK3, mitogen-activated protein kinase 3 isoform 1 .STKc_ERK1_2_like, Catalytic domain of Extracellular signal-Regulated ...S_TKc, Serine/Threonine protein kinases, catalytic domain	378.07	0.00028469	0.000142075	-7.85531	-9.03644	-7.96507	-10.7628	-9.15763	-8.11293	1.23438	0.284623	0.710563	2.0038	0.499052
gi|189066558|	49	85	63	61	47	51	39300	unnamed protein product .CY (2&times;), Cystatin-like domain	344.737	0.00330136	0.00243632	-6.11233	-5.41191	-5.73663	-5.85834	-6.12089	-6.09395	1.23707	0.283722	0.710563	1.35506	0.737973
gi|189067253|	32	19	36	13	34	18	71400	unnamed protein product .EF1B, Elongation factor 1 beta (EF1B) guanine nucleotide exchang...EF-1_beta_acid, Eukaryotic elongation factor 1 beta central acidic ...	626.316	0.000793804	0.000556447	-7.13014	-7.48709	-6.88743	-7.97176	-7.03774	-7.71483	1.2375	0.28358	0.710563	1.42656	0.700989
gi|189065514|	32	22	20	0	26	14	37100	unnamed protein product .EFh (3&times;), EF-hand, calcium binding motifEF-hand_7, EF-hand domain pair	325.439	0.00129601	0.000665223	-6.47546	-6.68931	-6.80964	-10.6129	-6.64687	-7.30378	1.24251	0.281914	0.710563	1.94823	0.513285
gi|67188443|	4	3	4	4	3	1	57200		501.754	0.000140318	9.99776e-05	-8.88556	-8.983	-8.75892	-8.84863	-9.10419	-10.0054	1.24327	0.281663	0.710563	1.40349	0.712509
gi|63995641|	3	3	6	3	3	3	25800	PPA2, unknown, partial .pyrophosphatase, Inorganic pyrophosphatase. These enzymes hydrolyze ...	226.316	0.000339952	0.000242571	-8.34069	-8.18682	-7.59502	-8.30377	-8.30801	-8.36192	1.24405	0.281404	0.710563	1.40145	0.713545
gi|189069083|	4	8	1	3	1	1	21100	unnamed protein product .TB2_DP1_HVA22, TB2/DP1, HVA22 family	185.088	0.000447817	0.000184779	-7.88827	-7.09841	-8.86026	-8.10267	-8.9542	-9.00812	1.25768	0.276925	0.710563	2.42353	0.412621
gi|158255090|	8	3	4	5	3	2	52900	unnamed protein product .ALBUMIN, serum albuminVitD-bind_III, Vitamin D binding protein, domain IIIALBUMIN, Albumin domain, contains five or six internal disulphid...	464.035	0.000196056	0.000130454	-8.17142	-8.90485	-8.68077	-8.56981	-9.02604	-9.41642	1.2795	0.269899	0.710563	1.50287	0.665395
gi|34098946|	19	19	17	14	20	18	35900	YBX1, nuclease-sensitive element-binding protein 1 .CSP_CDS, Cold-Shock Protein (CSP) contains an S1-like cold-shock...	314.912	0.00101427	0.000887407	-6.9534	-6.79953	-6.93498	-7.21274	-6.87071	-7.02727	1.27989	0.269773	0.710563	1.14296	0.874919
gi|154759421|	10	6	6	5	0	7	42400	PRMT1, protein arginine N-methyltransferase 1 isoform 1 .AdoMet_MTases, S-adenosylmethionine-dependent methyltransferases ...	371.93	0.000352034	0.000187585	-7.73885	-8.06455	-8.09179	-8.34856	-10.7507	-8.09655	1.28918	0.266835	0.709766	1.87666	0.532861
gi|167614504|	4	7	6	0	8	2	197900	LAMB1, laminin subunit beta-1 precursor .Vinculin, Vinculin familyEGF_Lam (13&times;), Laminin-type epidermal growth factor-like domainLaminin_N, Laminin N-terminal (Domain VI)COG1340, Uncharacterized archaeal coiled-coil protein [Function ...Domain V, contains 5 EGF-like repeatsDomain VI, N-terminal domain	1735.96	6.11032e-05	3.48063e-05	-10.1268	-9.46207	-9.63241	-12.2871	-9.45809	-10.7358	1.29067	0.266368	0.709766	1.75552	0.569632
gi|189069086|	9	7	8	5	10	5	20400	unnamed protein product .COG1100, GTPase SAR1 and related small G proteins [General funct...Arl3, Arf-like 3 (Arl3) GTPase	178.947	0.000801699	0.000630557	-7.10732	-7.18984	-7.09192	-7.61694	-6.97456	-7.67509	1.29142	0.26613	0.709766	1.27141	0.786526
gi|189066686|	18	23	15	14	19	4	26500	unnamed protein product .GST_C_Mu, C-terminal, alpha helical domain of Class Mu Glutathio...PTZ00057, glutathione s-transferaseGST_N_Mu, GST_N family, Class Mu subfamily	232.456	0.00140492	0.000876092	-6.70245	-6.30935	-6.75275	-6.90915	-6.61713	-8.13737	1.30145	0.263001	0.708534	1.60363	0.623587
gi|189067936|	5	4	2	3	3	1	60000	unnamed protein product .ARM (3&times;), Armadillo/beta-catenin-like repeats. An approximately 40 am...SRP1, Karyopherin (importin) alpha [Intracellular trafficking an...IBB, Importin beta binding domain	526.316	0.000132757	8.51729e-05	-8.73268	-8.77947	-9.3945	-9.14774	-9.15198	-10.0532	1.30657	0.261418	0.707593	1.55867	0.641572
gi|189054352|:reversed	5	6	5	4	6	4	115300		1011.4	9.82598e-05	8.02946e-05	-9.38587	-9.06494	-9.25924	-9.54962	-9.18613	-9.60777	1.30666	0.261388	0.707593	1.22374	0.817166
gi|158254740|	20	17	17	18	19	15	25900	unnamed protein product .PRK03996, proteasome subunit alphaproteasome_alpha_type_2, proteasome_alpha_type_2. The 20S proteasome, ...	227.193	0.00137572	0.00123411	-6.5769	-6.58125	-6.60849	-6.64263	-6.59423	-6.87771	1.31632	0.258428	0.703626	1.11474	0.897071
gi|62822168|	11	19	6	9	6	7	141400	HDLBP, unknown .vigilin_like_KH (14&times;), K homology RNA-binding domain_vigilin_like. The ...	1240.35	0.000172576	9.91628e-05	-8.85232	-8.17039	-9.29624	-9.00646	-9.39019	-9.301	1.3231	0.256367	0.70008	1.74032	0.574605
gi|158255588|	2	5	8	1	6	0	21200	unnamed protein product .Bcl-2_like, Apoptosis regulator proteins of the Bcl-2 family, na...bcl-2, apoptosis regulator	185.965	0.000513348	0.000242312	-8.48079	-7.53846	-7.13038	-8.95469	-7.4926	-10.1115	1.32637	0.255378	0.699448	2.11854	0.472023
gi|189053644|	4	4	10	0	7	2	33100	unnamed protein product .Translin, Translin family	290.351	0.000383765	0.000189801	-8.33853	-8.18466	-7.36461	-10.4988	-7.79503	-8.94755	1.33136	0.253879	0.698278	2.02194	0.494574
gi|158255308|	10	11	7	6	8	0	53400	unnamed protein product .RRM_FUS_TAF15, RNA recognition motif in vertebrate fused in Ewin...COG0724, RNA-binding proteins (RRM domain) [General function pre...zf-RanBP, Zn-finger in Ran binding protein and others	468.421	0.000356007	0.000175848	-7.96951	-7.72467	-8.17935	-8.41216	-8.14814	-11.0353	1.33285	0.253434	0.698278	2.02452	0.493945
gi|189065449|	14	10	25	16	8	8	36400	unnamed protein product Calponin (3&times;), Calponin family repeat	319.298	0.000896981	0.000551252	-7.2635	-7.4324	-6.57234	-7.09736	-7.7649	-7.81881	1.34254	0.25055	0.698278	1.62717	0.614564
gi|189053129|	16	9	12	11	10	12	13400	unnamed protein product .Ribosomal_S10, Ribosomal protein S10p/S20e	117.544	0.00182747	0.00153219	-6.13497	-6.53317	-6.28597	-6.45906	-6.55428	-6.43383	1.35027	0.248273	0.696522	1.19272	0.838418
gi|2393732|	5	4	6	6	3	2	32900	CAPZA2, unknown .F-actin_cap_A, F-actin capping protein alpha subunit	288.596	0.000323014	0.000228249	-8.1318	-8.1786	-7.83812	-7.92783	-8.55111	-8.94149	1.35096	0.24807	0.696522	1.41518	0.706622
gi|158255734|	82	66	72	63	81	46	23700	unnamed protein product .cyclophilin_ABH_like, cyclophilin_ABH_like: Cyclophilin A, B and H-like ...	207.895	0.00599526	0.00483925	-5.09576	-5.15748	-5.09834	-5.32059	-5.07527	-5.69033	1.36122	0.245082	0.693898	1.23888	0.80718
gi|189055342|	159	153	154	144	161	167	26700	unnamed protein product .TIM, Triosephosphate isomerase (TIM) is a glycolytic enzyme that...	234.211	0.0112843	0.0105573	-4.5557	-4.44017	-4.46092	-4.61754	-4.51056	-4.52799	1.36669	0.243502	0.691998	1.06886	0.935573
gi|158260235|	14	5	11	6	7	0	28300	unnamed protein product .EFh (2&times;), EF-hand, calcium binding motifEF-hand_8, EF-hand domain pair	248.246	0.000703704	0.000310407	-7.01179	-7.82732	-7.11696	-7.77721	-7.63836	-10.4003	1.37723	0.240488	0.691714	2.26704	0.441104
gi|189054305|	4	2	3	4	0	1	20100	unnamed protein product .CHCH, CHCH domain	176.316	0.000332184	0.0001941	-7.83972	-8.27364	-7.9644	-7.8028	-10.0043	-8.95956	1.38159	0.23925	0.691714	1.71141	0.584313
gi|410562529|	7	10	8	9	5	6	12100	Chain A, Solution Nmr Structure Of The Eukaryotic Rna Recognition Motif, Rrm1, From The Heterogeneous Nuclear Ribonucleoprotein H From Homo Sapiens, Northeast Structural Genomics Consortium (Nesg) Target Hr8614a.RRM1_hnRNPH_hnRNPH2_hnRNPF, RNA recognition motif 1 in heterogeneous nuclear ...COG0724, RNA-binding proteins (RRM domain) [General function pre...	106.14	0.00142426	0.00106131	-6.82138	-6.33104	-6.56959	-6.54807	-7.09885	-6.98571	1.38193	0.239155	0.691714	1.34198	0.745168
gi|148727331|	13	22	25	18	11	14	95700	USP5, ubiquitin carboxyl-terminal hydrolase 5 isoform 1 .Peptidase_C19B, A subfamily of Peptidase C19. Peptidase C19 cont...UBA (2&times;), Ubiquitin Associated domain. The UBA domain is a commonly o...zf-UBP, Zn-finger in ubiquitin-hydrolases and other proteinUBP14, Isopeptidase T [Posttranslational modification, protein t...	839.474	0.00042079	0.000277361	-8.30161	-7.63691	-7.53899	-7.9496	-8.42927	-8.25138	1.38484	0.238335	0.691714	1.51712	0.659143
gi|158256584|	5	7	3	1	5	3	16300	unnamed protein product .Cyt-b5, Cytochrome b5-like Heme/Steroid binding domainMIP, Major intrinsic protein (MIP) superfamily. Members of the M...	142.982	0.000655355	0.000383631	-7.4295	-6.96547	-7.75485	-8.69186	-7.39681	-7.90271	1.39207	0.236306	0.690222	1.7083	0.585378
gi|189054553|	11	3	4	5	1	3	75300	unnamed protein product .ArgRS_core, catalytic core domain of arginyl-tRNA synthetasesAnticodon_Ia_like, Anticodon-binding domain of class Ia aminoacyl tRNA ...PLN02286, arginine-tRNA ligaseArg_tRNA_synt_N, Arginyl tRNA synthetase N terminal dom	660.526	0.000161092	8.31803e-05	-8.22221	-9.25792	-9.03385	-8.92289	-10.2264	-9.43302	1.39916	0.234332	0.68663	1.93666	0.516353
gi|62088334|	5	2	5	1	5	0	122900	microtubule-associated protein 4 isoform 1 variant, partial .Tubulin-binding (4&times;), Tau and MAP protein, tubulin-binding repeat	1078.07	6.99275e-05	3.68694e-05	-9.4497	-10.0843	-9.32307	-10.7121	-9.41702	-11.8688	1.40289	0.233301	0.685787	1.89663	0.527252
gi|47678511|	3	2	1	0	2	1	68300	EWSR1, EWSR1 .COG0724, RNA-binding proteins (RRM domain) [General function pre...zf-RanBP, Zn-finger in Ran binding protein and othersRRM_EWS, RNA recognition motif in vertebrate Ewing Sarcoma Prote...	599.123	6.96886e-05	3.92323e-05	-9.31423	-9.49683	-10.0349	-11.2232	-9.61802	-10.1828	1.40294	0.233287	0.685787	1.77631	0.562966
gi|3387911|	3	4	5	4	2	3	34000	2-oxoglutarate carrier protein .PTZ00169, ADP/ATP transporter on adenylate translocaseMito_carr (3&times;), Mitochondrial carrier protein	298.246	0.000258504	0.000184144	-8.61668	-8.21149	-8.03806	-8.32844	-8.92047	-8.63791	1.40509	0.232696	0.685787	1.40381	0.712346
gi|189054987|	5	2	4	2	1	4	12400	unnamed protein product .Tctex-1, Tctex-1 family	108.772	0.000639407	0.000404227	-7.15603	-7.79061	-7.23007	-7.90756	-8.42263	-7.37793	1.4099	0.231378	0.685787	1.5818	0.632191
gi|189054781|	14	7	9	4	12	1	28400	unnamed protein product .PRE1, 20S proteasome, alpha and beta subunits [Posttranslational...proteasome_alpha_type_3, proteasome_alpha_type_3. The 20S proteasome, ...	249.123	0.00070252	0.000393333	-7.01532	-7.52069	-7.31154	-8.14847	-7.13106	-9.30523	1.4147	0.230069	0.685787	1.78607	0.559888
gi|156938343|	9	24	15	10	12	7	271400	TLN2, talin-2 .talin-RS (2&times;), rod-segment of the talin C-terminal domainI_LWEQ, I/LWEQ domainILWEQ, I/LWEQ domainB41, Band 4.1 homologuesFERM_C_Talin, Talin FERM domain C-lobe/F3FERM_M, FERM central domainVBS, Vinculin Binding SiteFERM_N, FERM N-terminal domainTalin_middle, Talin, middle domain	2380.7	0.000120257	6.72977e-05	-9.69538	-8.59413	-9.0792	-9.55837	-9.38826	-9.953	1.41797	0.229179	0.685787	1.78694	0.559617
gi|189066545|	1	2	8	0	2	1	29200	unnamed protein product .RPA_C, Replication protein A C terminalRFA2, Single-stranded DNA-binding replication protein A (RPA), m...RPA2_DBD_D, RPA2_DBD_D: A subfamily of OB folds corresponding to...	256.14	0.000282371	9.1766e-05	-9.31178	-8.64708	-7.45055	-10.3735	-8.76827	-9.33301	1.42031	0.228547	0.685787	3.07708	0.324983
sp|ALBU_BOVIN|	912	910	1177	944	903	875	69200	Serum albumin; BSA; Bos d 6; Flags: Precursor;	607.018	0.0280515	0.0234742	-3.76389	-3.61221	-3.3823	-3.6925	-3.74112	-3.82651	1.42168	0.228175	0.685787	1.19499	0.836824
gi|62822513|	3	1	2	0	3	0	79400	NDUFS1, unknown .fer2, 2Fe-2S iron-sulfur cluster binding domain. Iron-sulfur pro...MopB_Res-Cmplx1_Nad11, MopB_Res_Cmplx1_Nad11: The second domain of the ...PRK09130, NADH dehydrogenase subunit GDUF1982, Domain of unknown function (DUF1982)NADH-G_4Fe-4S_3, NADH-ubiquinone oxidoreductase-G iron-sulfur bi...	696.491	5.97148e-05	3.41481e-05	-9.46481	-10.1582	-9.67465	-11.3738	-9.43213	-11.432	1.42356	0.227669	0.685787	1.7487	0.571853
gi|854177|	3	1	2	0	3	0	17100	RNA polymerase II subunit hRPB17 .RNA_pol_Rpb8, RNA polymerase Rpb8	150	0.000277272	0.000158559	-7.92939	-8.62282	-8.13923	-9.83838	-7.89671	-9.89653	1.42356	0.227669	0.685787	1.7487	0.571853
gi|189066516|	32	19	18	14	22	20	20600	unnamed protein product .DUF3456, TLR4 regulator and MIR-interacting MSAP	180.702	0.00216989	0.00166104	-5.88713	-6.24408	-6.32397	-6.6573	-6.22217	-6.36917	1.42673	0.226817	0.685787	1.30634	0.765496
gi|158257674|	3	2	2	4	0	0	44400	unnamed protein product .PLN02789, farnesyltranstransferasePPTA (5&times;), Protein prenyltransferase alpha subunit repeat	389.474	0.000122189	7.49421e-05	-8.88356	-9.06616	-9.0934	-8.59532	-10.7968	-10.8507	1.42993	0.225962	0.685787	1.63044	0.613331
gi|24308273|	7	3	10	2	2	7	9100	ABRACL, costars family protein ABRACL .Costars, Costars	79.8246	0.00151403	0.000806607	-6.53645	-7.14472	-6.07335	-7.59814	-7.60238	-6.55768	1.43372	0.224952	0.685787	1.87704	0.532754
gi|15277250|	2	7	3	0	0	6	140400	VARS2, valyl tRNA synthetase .ValRS_core, catalytic core domain of valyl-tRNA synthetasesAnticodon_Ia_Val, Anticodon-binding domain of valyl tRNA synthetasesPTZ00419, valyl-tRNA synthetase-like proteinGst, Glutathione S-transferase [Posttranslational modification, ...GST_N, Glutathione S-transferase, N-terminal domainGST_C_ValRS_N, Glutathione S-transferase C-terminal-like, alpha ...tRNA-synt_1_2…	1231.58	6.35571e-05	3.08968e-05	-10.3713	-9.1188	-9.90818	-11.9438	-11.948	-9.437	1.43545	0.224492	0.685787	2.05707	0.486127
gi|189069146|	24	12	12	13	13	5	30000	unnamed protein product .CH, Calponin homology (CH) domainEB1, EB1-like C-terminal motif	263.158	0.001041	0.000651582	-6.5456	-7.06468	-7.09192	-7.10466	-7.1089	-8.06076	1.43851	0.22368	0.685787	1.59765	0.625921
gi|3891861|	4	1	2	1	2	0	18200	Chain A, Pin1 Peptidyl-prolyl Cis-trans Isomerase From Homo Sapiens.WW, Two conserved tryptophans domainRotamase_2, PPIC-type PPIASE domainSurA, Parvulin-like peptidyl-prolyl isomerase [Posttranslational...	159.649	0.000292728	0.000149117	-7.74042	-8.68516	-8.20158	-8.80211	-8.29553	-9.95888	1.43896	0.223562	0.685787	1.96307	0.509406
gi|41350088|	3	2	4	2	2	3	35300	JTV1, unknown .GST_C_AIMP2, Glutathione S-transferase C-terminal-like, alpha he...	309.649	0.00019139	0.000142896	-8.6542	-8.8368	-8.27625	-8.95375	-8.95799	-8.67543	1.44075	0.223089	0.685787	1.33937	0.746621
gi|189054724|	13	14	14	8	0	11	40100	unnamed protein product .CSP_CDS, Cold-Shock Protein (CSP) contains an S1-like cold-shock...	351.754	0.000685267	0.000301111	-7.43177	-7.20643	-7.23367	-7.85747	-10.6949	-7.61334	1.44346	0.222377	0.685787	2.27579	0.439407
gi|156713442|	6	3	13	5	3	0	29500	PSMA4, proteasome subunit alpha type-4 isoform 1 .PTZ00246, proteasome subunit alphaproteasome_alpha_type_4, proteasome_alpha_type_4. The 20S proteasome, ...	258.772	0.000514838	0.00019502	-7.85567	-8.32083	-6.99815	-7.9858	-8.44202	-10.4418	1.45262	0.219982	0.685787	2.63993	0.378798
gi|189053594|	15	16	12	12	15	10	27400	unnamed protein product .PRK03996, proteasome subunit alphaproteasome_alpha_type_6, proteasome_alpha_type_6. The 20S proteasome, ...	240.351	0.00104703	0.000840165	-6.91278	-6.69639	-7.00126	-7.09097	-6.8801	-7.32348	1.45406	0.219605	0.685787	1.24622	0.802429
gi|189055353|	2	3	6	1	2	3	57200	unnamed protein product .PLN02466, aldehyde dehydrogenase family 2 memberALDH_F1AB_F2_RALDH1, NAD+-dependent retinal dehydrogenase 1, ALDH ...	501.754	0.000143085	7.75501e-05	-9.47334	-8.983	-8.3912	-9.94724	-9.44066	-9.1581	1.45618	0.219058	0.685787	1.84507	0.541986
gi|41472552|	8	5	3	4	3	0	61200	ZYX, unknown	536.842	0.00018094	8.40644e-05	-8.31716	-8.59861	-9.07783	-8.91623	-9.17178	-11.1716	1.45778	0.218643	0.685787	2.1524	0.464598
gi|158259845|	10	10	5	5	8	2	31900	unnamed protein product .LIM4_FHL1, The fourth LIM domain of Four and a half LIM domains ...LIM2_FHL1, The second LIM domain of Four and a half LIM domains ...LIM, LIM is a small protein-protein interaction domain, containi...LIM1_FHL1, The first LIM domain of Four and a half LIM domains p...LIM3_FHL1, The third LIM domain of Four and a half LIM domains p...	279.825	0.000532793	0.000311282	-7.45431	-7.30044	-7.97431	-8.06401	-7.63294	-8.91062	1.46616	0.216488	0.685787	1.71161	0.584246
gi|189053094|	17	10	13	10	14	9	20100	unnamed protein product .Ferritin, Ferritin iron storage proteinsFerritin, Ferritin-like domain	176.316	0.00131461	0.00102607	-6.4816	-6.83855	-6.61448	-6.9555	-6.63697	-7.11374	1.47256	0.214856	0.685787	1.2812	0.780516
gi|189054232|	153	144	119	135	137	130	22600	unnamed protein product Calponin, Calponin family repeat	198.246	0.0118729	0.0106473	-4.42733	-4.33388	-4.55108	-4.51513	-4.50472	-4.61088	1.48664	0.211309	0.685787	1.11511	0.89677
gi|158255604|	4	3	9	1	6	0	48200	unnamed protein product .Trans_IPPS_HT, Trans-Isoprenyl Diphosphate Synthases, head-to-ta...	422.807	0.000235547	0.000106577	-8.71436	-8.8118	-7.84051	-9.77605	-8.31395	-10.9328	1.48947	0.210605	0.685787	2.21011	0.452466
gi|63991162|	82	62	44	47	59	47	24800	UCHL1, unknown .Peptidase_C12_UCH_L1_L3, Cysteine peptidase C12 containing ubiquitin ...	217.544	0.00486774	0.00371789	-5.14112	-5.26488	-5.6318	-5.65627	-5.43526	-5.71442	1.50521	0.206724	0.685787	1.30927	0.763782
gi|189053660|	2	2	6	1	2	2	40900	unnamed protein product .Pribosyl_synth, Phosphoribosyl synthetase-associated domainPribosyltran_N, N-terminal domain of ribose phosphate pyrophosph...PRTases_typeI, Phosphoribosyl transferase (PRT)-type I domain	358.772	0.00018339	9.44227e-05	-9.13792	-8.98405	-8.05578	-9.61182	-9.10524	-9.15915	1.51286	0.204864	0.685787	1.94222	0.514874
gi|11496885|	10	7	6	0	3	8	49800	PDLIM7, PDZ and LIM domain protein 7 isoform 1 .LIM3_Enigma, The third LIM domain of EnigmaLIM1_Enigma, The first LIM domain of EnigmaLIM2_Enigma, The second LIM domain of EnigmaPDZ_signaling, PDZ domain found in a variety of Eumetazoan signa...	436.842	0.000313455	0.00014665	-7.89972	-8.08232	-8.25266	-10.9073	-8.96565	-8.13226	1.51719	0.203819	0.685787	2.13744	0.46785
gi|158258683|	5	4	11	1	3	6	17300	unnamed protein product .Prefoldin_alpha, Prefoldin alpha subunit	151.754	0.000806611	0.000390958	-7.48904	-7.53584	-6.62481	-8.7514	-7.90834	-7.34321	1.55302	0.195376	0.675401	2.06317	0.484692
gi|189069194|	37	43	38	32	34	42	29800	unnamed protein product .PHB, prohibitin homologuesSPFH_prohibitin, Prohibitin family	261.404	0.00259569	0.00218337	-6.11325	-5.81095	-5.9603	-6.21942	-6.16395	-6.00931	1.575	0.190376	0.673247	1.18885	0.841151
gi|47678375|	4	2	7	0	3	2	30000	COMT, COMT .AdoMet_MTases, S-adenosylmethionine-dependent methyltransferases ...	263.158	0.000311289	0.000128644	-8.2402	-8.67411	-7.60274	-10.4005	-8.45883	-8.84921	1.58867	0.187334	0.673121	2.41978	0.413261
gi|13654237|	23	33	23	0	51	0	468800	PRKDC, DNA-dependent protein kinase catalytic subunit isoform 1 .FAT, FAT domainPIKKc_DNA-PK, DNA-dependent protein kinase (DNA-PK), catalytic d...FATC, FATC domainNUC194, NUC194 domain	4112.28	0.000111612	6.78079e-05	-9.33625	-8.82784	-9.20962	-13.1495	-8.51899	-13.2076	1.60228	0.184354	0.66729	1.646	0.607533
gi|118138507|	16	15	21	17	13	8	35400	Chain C, Crystal Structure Of Ape1 From Homo Sapiens In A New Crystal Form Complexed With A Ligand.Ape1-like_AP-endo, Human Ape1-like subfamily of the ExoIII family ...	310.526	0.000976836	0.00066957	-7.10643	-7.01508	-6.71511	-7.01067	-7.27442	-7.79095	1.6023	0.184348	0.66729	1.4589	0.685447
gi|221045880|	13	14	11	10	13	7	27300	unnamed protein product .Flavodoxin_2, Flavodoxin-like fold	239.474	0.000933439	0.000691222	-7.04728	-6.82194	-7.08099	-7.26167	-7.01459	-7.65629	1.60677	0.18338	0.66729	1.35042	0.740511
gi|4826774|	6	3	15	3	4	0	17900	ISG15, ubiquitin-like protein ISG15 precursor .ubiquitin, Ubiquitin familyUBQ, Ubiquitin-like proteinsUBQ, Ubiquitin homologuesISG15_repeat1, ISG15 ubiquitin-like protein, first repeat of 2	157.018	0.000922827	0.000287272	-7.35608	-7.82124	-6.36041	-7.93819	-7.69112	-9.94226	1.61439	0.181742	0.66729	3.21238	0.311295
gi|23510381|	6	6	5	5	4	1	101200	TNPO1, transportin-1 isoform 2 .HEAT_EZ, HEAT-like repeatARM (2&times;), Armadillo/beta-catenin-like repeats. An approximately 40 am...IBN_N, Importin-beta N-terminal domainHEAT_2 (2&times;), HEAT repeats	887.719	0.000117744	6.85063e-05	-9.08838	-8.9345	-9.1288	-9.21851	-9.42342	-10.5759	1.61441	0.181739	0.66729	1.71873	0.581826
gi|189053495|	6	4	3	1	3	4	22000	unnamed protein product .P-mevalo_kinase, Phosphomevalonate kinase	192.982	0.00041896	0.000255255	-7.56232	-7.77617	-8.05473	-8.99173	-8.14868	-7.95127	1.62014	0.180518	0.66729	1.64134	0.609259
gi|158259407|	3	1	7	1	2	0	25600	unnamed protein product .PAF_acetylesterase_like, PAF_acetylhydrolase (PAF-AH)_like subfamily of ...	224.561	0.000315178	0.000106013	-8.33291	-9.02633	-7.44414	-9.14328	-8.6367	-10.3	1.62462	0.179569	0.66729	2.97301	0.336359
gi|20379074|	13	15	16	14	13	11	23900	RAB14, small GTP binding protein RAB14 .Rab14, Rab GTPase family 14 (Rab14)PLN03108, Rab family protein	209.649	0.00123406	0.000987433	-6.91427	-6.62225	-6.58697	-6.80589	-6.88159	-7.09584	1.62598	0.179281	0.66729	1.24976	0.800153
gi|158259071|	2	6	3	2	2	0	40300	unnamed protein product .RRM1_RBM4, RNA recognition motif 1 in vertebrate RNA-binding pro...zf-CCHC, Zinc knuckleRRM2_RBM4, RNA recognition motif 2 in vertebrate RNA-binding pro...	353.509	0.000204456	8.24387e-05	-9.12314	-8.01376	-8.66004	-9.08622	-9.09046	-10.7538	1.6279	0.178876	0.66729	2.4801	0.403209
gi|1905912|	6	5	2	0	3	2	39600	RAD23A, human RAD23A homolog .rad23, UV excision repair protein Rad23XPC-binding, XPC-binding domainUBA (2&times;), Ubiquitin Associated domain. The UBA domain is a commonly o...RAD23_N, Ubiquitin-like domain of RAD23	347.368	0.00023322	9.74574e-05	-8.15011	-8.16329	-8.97899	-10.6781	-8.73646	-9.12685	1.65786	0.172685	0.66729	2.39304	0.417878
gi|189053175|	12	7	21	3	11	6	15200	unnamed protein product .Lipocalin, Lipocalin / cytosolic fatty-acid binding protein fami...	133.333	0.00176081	0.000843844	-6.53865	-6.8956	-5.86969	-7.77469	-6.58935	-7.2138	1.66351	0.171543	0.66729	2.08665	0.479237
gi|189053836|	8	5	4	4	0	3	28800	unnamed protein product .PCNA, Proliferating Cell Nuclear Antigen (PCNA) domain found in ...pcna, proliferating cell nuclear antigen (pcna)	252.632	0.000407603	0.000175325	-7.56339	-7.84483	-8.07275	-8.16245	-10.3639	-8.47192	1.6662	0.171002	0.66729	2.32484	0.430137
gi|189053990|	10	12	12	5	13	4	21600	unnamed protein product .ADK, Adenylate kinase (ADK) catalyzes the reversible phosphoryl ...aden_kin_iso1, adenylate kinase, isozyme 1 subfamily	189.474	0.00106582	0.000653088	-7.0644	-6.73617	-6.76341	-7.6741	-6.7804	-7.93292	1.66698	0.170846	0.66729	1.63198	0.612754
gi|153251270|	4	1	4	1	2	1	35500	CPPED1, calcineurin-like phosphoesterase domain-containing protein 1 isoform a .MPP_CSTP1, Homo sapiens CSTP1 and related proteins, metallophosp...Icc, Predicted phosphohydrolases [General function prediction on...	311.404	0.000187564	9.26172e-05	-8.40853	-9.35327	-8.2819	-9.47022	-8.96364	-9.52838	1.67134	0.169974	0.66729	2.02516	0.493789
gi|158260913|	90	114	95	58	80	103	27700	unnamed protein product .14-3-3_beta_zeta, 14-3-3 beta and zeta isoforms of 14-3-3 protein	242.982	0.00703633	0.00518987	-5.15916	-4.77006	-4.97875	-5.55856	-5.24357	-5.04617	1.67777	0.168695	0.66729	1.35578	0.737582
gi|20379040|	13	14	16	12	13	14	24700	RAB3B, small GTP binding protein RAB3B .COG1100, GTPase SAR1 and related small G proteins [General funct...Rab3, Rab GTPase family 3 contains Rab3A, Rab3B, Rab3C and Rab3D	216.667	0.0011664	0.000975907	-6.94719	-6.72186	-6.61989	-6.98723	-6.91451	-6.89696	1.68963	0.166365	0.66729	1.1952	0.836682
gi|189053234|	5	4	6	1	4	4	25200	unnamed protein product .FKBP_C, FKBP-type peptidyl-prolyl cis-trans isomerase	221.053	0.000421713	0.00024688	-7.86517	-7.91197	-7.57149	-9.12753	-8.03316	-8.08707	1.70291	0.163796	0.66729	1.70817	0.585423
gi|25777732|	4	4	3	4	0	1	56300	ALDH2, aldehyde dehydrogenase, mitochondrial isoform 1 precursor .PLN02466, aldehyde dehydrogenase family 2 memberALDH_F1AB_F2_RALDH1, NAD+-dependent retinal dehydrogenase 1, ALDH ...	493.86	0.000142887	6.92967e-05	-8.8697	-8.71582	-8.99438	-8.83277	-11.0342	-9.98954	1.70428	0.163533	0.66729	2.06196	0.484976
gi|41473433|	25	19	13	18	10	13	21400	RAC1, unknown .COG1100, GTPase SAR1 and related small G proteins [General funct...Rac1_like, Ras-related C3 botulinum toxin substrate 1 (rho famil...	187.719	0.00174151	0.00118522	-6.16779	-6.28218	-6.67715	-6.45178	-7.02241	-6.82501	1.71657	0.161195	0.66729	1.46936	0.680569
gi|158261809|	22	22	21	21	15	22	59700	unnamed protein product .TCP1_epsilon, TCP-1 (CTT or eukaryotic type II) chaperonin famil...Cpn60_TCP1, TCP-1/cpn60 chaperonin family	523.684	0.000718333	0.000592686	-7.3189	-7.16502	-7.23773	-7.32743	-7.65889	-7.34012	1.72035	0.160484	0.66729	1.212	0.825086
gi|189053402|	3	8	5	3	3	3	38800	unnamed protein product .Esterase_lipase, Esterases and lipases (includes fungal lipases, ...Abhydrolase_6, Alpha/beta hydrolase family	340.351	0.000297021	0.000161297	-8.74874	-7.70756	-8.17012	-8.71181	-8.71605	-8.76996	1.73581	0.157608	0.66729	1.84145	0.54305
gi|21040371|	8	10	10	13	0	0	49100	DDX39A, ATP-dependent RNA helicase DDX39A .DEADc, DEAD-box helicases. A diverse family of proteins involved...PTZ00424, helicase 45HELICc, Helicase superfamily c-terminal domain	430.702	0.000390035	0.000179278	-8.09687	-7.73169	-7.75893	-7.59732	-10.8974	-10.9513	1.75093	0.154848	0.66729	2.17559	0.459645
gi|6164955|	7	3	6	4	2	4	20500	vacuolar sorting protein VPS29/PEP11 .MPP_Vps29, Homo sapiens Vps29 and related proteins, metallophosp...	179.825	0.00054224	0.000333409	-7.3486	-7.95687	-7.36507	-7.8225	-8.41453	-7.88065	1.75532	0.154056	0.66729	1.62635	0.614873
gi|41350078|	3	2	9	0	2	2	19000		166.667	0.000530698	0.000171239	-8.03475	-8.21736	-6.90959	-9.94374	-8.33855	-8.39246	1.757	0.153754	0.66729	3.09916	0.322668
gi|21493022|	13	16	10	3	14	5	191400	AKAP12, A-kinase anchor protein 12 isoform 1 .WSK (2&times;), WSK motif	1678.95	0.000136808	7.35097e-05	-8.99475	-8.64021	-9.11944	-10.3078	-8.89061	-9.91392	1.76201	0.152858	0.66729	1.86109	0.53732
gi|158254808|	1	5	8	3	0	0	32700	unnamed protein product .GlcN6P_deaminase, GlcN6P_deaminase: Glucosamine-6-phosphate (GlcN6P) ...	286.842	0.000314884	8.31524e-05	-9.42499	-7.97183	-7.56376	-8.54077	-10.4909	-10.5448	1.77244	0.15101	0.66729	3.78682	0.264074
gi|158256010|	36	28	23	0	42	0	62300	unnamed protein product .D-hydantoinase, D-hydantoinaseD-HYD, D-hydantoinases (D-HYD) also called dihydropyrimidases (D...	546.491	0.000907325	0.000422735	-6.87773	-6.97126	-7.19141	-11.1313	-6.69285	-11.1894	1.78112	0.149489	0.66729	2.14632	0.465914
gi|20379060|	32	38	39	26	36	29	23500	RAB7, small GTP binding protein RAB7 .COG1100, GTPase SAR1 and related small G proteins [General funct...Rab7, Rab GTPase family 7 (Rab7)	206.14	0.00304964	0.00234741	-6.01884	-5.69555	-5.69715	-6.18601	-5.87009	-6.13692	1.78948	0.148039	0.66729	1.29915	0.769734
gi|158259627|	6	7	2	5	0	0	36500	unnamed protein product .Aldo_ket_red, Aldo-keto reductases (AKRs) are a superfamily of s...	320.175	0.000290497	0.000107829	-8.06859	-7.77162	-8.89747	-8.19872	-10.6009	-10.6548	1.79248	0.147523	0.66729	2.69404	0.37119
gi|4507791|	5	3	4	0	4	1	20900	UBE2M, NEDD8-conjugating enzyme Ubc12 .UBCc, Ubiquitin-conjugating enzyme E2, catalytic (UBCc) domain. ...	183.333	0.000412079	0.000186177	-7.67808	-7.97619	-7.75212	-10.0391	-7.84607	-8.99859	1.81211	0.144193	0.66729	2.21337	0.4518
gi|368711292|	4	2	4	0	3	1	24800		217.544	0.000296062	0.000132473	-8.04985	-8.48376	-7.92321	-10.2101	-8.26848	-9.16969	1.81509	0.143695	0.66729	2.23489	0.44745
gi|10835049|	25	25	21	22	21	14	21800	RHOA, transforming protein RhoA precursor .COG1100, GTPase SAR1 and related small G proteins [General funct...RhoA_like, Ras homology family A (RhoA)-like includes RhoA, RhoB...	191.228	0.00214196	0.00160709	-6.18631	-6.03244	-6.2303	-6.27455	-6.32425	-6.77207	1.81607	0.143531	0.66729	1.33282	0.750287
gi|194388530|	12	13	15	12	11	7	20800	unnamed protein product .PROF, Profilin binds actin monomers, membrane polyphosphoinositi...	182.456	0.00129205	0.000907477	-6.8523	-6.62147	-6.51056	-6.81538	-6.903	-7.38436	1.83187	0.140922	0.66729	1.42378	0.702357
gi|158257152|	3	3	3	0	1	3	35700	unnamed protein product .crotonase-like, Crotonase/Enoyl-Coenzyme A (CoA) hydratase super...PRK06142, enoyl-CoA hydratase	313.158	0.00018976	9.02451e-05	-8.66547	-8.51159	-8.53883	-10.5745	-9.48008	-8.6867	1.83586	0.14027	0.66729	2.10272	0.475575
gi|210032390|	4	8	12	8	0	0	34000		298.246	0.0004932	0.000169436	-8.36536	-7.5755	-7.21708	-7.69245	-10.5299	-10.5838	1.85788	0.136735	0.66729	2.91084	0.343544
gi|189066562|	1	4	2	0	0	2	22700	unnamed protein product .EMP24_GP25L, emp24/gp25L/p24 family/GOLD	199.123	0.000247587	8.99561e-05	-9.05998	-7.80749	-8.42252	-10.1217	-10.1259	-8.57038	1.86205	0.136077	0.66729	2.75231	0.363331
gi|347446676|	5	14	6	4	5	2	54200	C7orf55-LUC7L2, C7orf55-LUC7L2 protein .Complex1_LYR_2, Complex1_LYR-likeLUC7, LUC7 N_terminusLUC7, U1 snRNP component, mediates U1 snRNP association with cap...	475.439	0.000322239	0.000138455	-8.63101	-7.50774	-8.33733	-8.79476	-8.59833	-9.4407	1.86346	0.135855	0.66729	2.3274	0.429665
gi|189053110|	36	17	23	17	15	4	20500	unnamed protein product .P21-Arc, ARP2/3 complex ARPC3 (21 kDa) subunit	179.825	0.00239046	0.00110334	-5.76619	-6.34743	-6.07987	-6.46438	-6.58998	-7.88065	1.8929	0.131311	0.662295	2.16657	0.461559
gi|61743954|	19	23	8	7	9	1	628700	AHNAK, neuroblast differentiation-associated protein AHNAK isoform 1 .COG2911 (2&times;), Uncharacterized protein conserved in bacteria [Function...PDZ, PDZ domain, also called DHR (Dlg homologous region) or GLGF...	5514.91	5.27417e-05	1.77801e-05	-9.81632	-9.47586	-10.52	-10.7349	-10.5028	-12.4025	1.89684	0.130715	0.662295	2.96632	0.337118
gi|4503143|	13	19	19	15	11	8	44500	CTSD, cathepsin D preproprotein .Cathepsin_D2, Cathepsin_D2, pepsin family of proteinasesA1_Propeptide, A1 PropeptideAsp, Eukaryotic aspartyl protease	390.351	0.000769113	0.000478079	-7.53588	-7.01428	-7.04152	-7.3608	-7.66354	-8.01973	1.899	0.130389	0.662295	1.60876	0.621599
gi|189066672|	14	13	12	13	10	13	37500	unnamed protein product .Transaldolase_TalAB, Transaldolases including both TalA and TalBPTZ00411, transaldolase-like protein	328.947	0.000694688	0.000595252	-7.29327	-7.21086	-7.31506	-7.32781	-7.58336	-7.38596	1.90579	0.129372	0.662295	1.16705	0.856862
gi|158260777|	24	18	14	8	15	16	21100	unnamed protein product .SOUL, SOUL heme-binding protein	185.088	0.00173762	0.00113891	-6.19368	-6.32071	-6.59157	-7.21536	-6.61883	-6.61022	1.92196	0.126984	0.658464	1.52568	0.655444
gi|189055071|	1	2	4	0	1	1	39800	unnamed protein product .Mo25, Mo25-like	349.123	0.000140288	5.21054e-05	-9.62148	-8.95678	-8.39624	-10.6832	-9.5888	-9.64271	1.95138	0.122762	0.642153	2.69239	0.371417
gi|189069387|	3	6	7	4	2	2	34200	unnamed protein product	300	0.000335896	0.000166284	-8.62254	-7.84963	-7.73377	-8.3343	-8.92633	-8.98024	1.95298	0.122537	0.642153	2.02001	0.495047
gi|158259229|	3	1	7	1	1	1	109800	unnamed protein product .Xpo1, Exportin 1-like proteinIBN_N, Importin-beta N-terminal domain	963.158	7.34842e-05	2.44275e-05	-9.78898	-10.4824	-8.9002	-10.5994	-10.6036	-10.6575	1.95575	0.122148	0.642153	3.00826	0.332419
gi|158260945|	1	5	3	0	2	0	116500	unnamed protein product .VCBS, Repeat domain in Vibrio, Colwellia, Bradyrhizobium and She...Integrin_alpha2, Integrin alphaInt_alpha (4&times;), Integrin alpha (beta-propellor repeats)	1021.93	5.98239e-05	1.80737e-05	-10.6955	-9.24235	-9.72158	-11.7572	-10.152	-11.8153	1.95621	0.122084	0.642153	3.30999	0.302115
gi|158256108|	95	108	100	79	93	98	51000	unnamed protein product .PCBP_like_KH (2&times;), K homology RNA-binding domain, PCBP_like. Members ...KH-I, K homology RNA-binding domain, type I. KH binds single-st...ROKNT, ROKNT (NUC014) domain	447.368	0.00386396	0.00316745	-5.71578	-5.43428	-5.53812	-5.86222	-5.70426	-5.70608	1.99901	0.116248	0.642153	1.2199	0.819741
gi|5453908|	3	1	3	0	2	0	31800		278.947	0.000170025	6.62135e-05	-8.54978	-9.24321	-8.42315	-10.4588	-8.85357	-10.5169	2.00172	0.115889	0.642153	2.56783	0.389434
gi|158256616|	19	18	16	17	14	10	37300	unnamed protein product WD40, WD40 domain, found in a number of eukaryotic proteins that...	327.193	0.00094003	0.00068248	-6.99166	-6.89043	-7.03208	-7.06295	-7.25524	-7.63193	2.00382	0.115611	0.642153	1.37737	0.726019
gi|14043072|	107	73	80	0	0	94	37400	HNRNPA2B1, heterogeneous nuclear ribonucleoproteins A2/B1 isoform B1 .RRM2_hnRNPA2B1, RNA recognition motif 2 in heterogeneous nuclear ...RRM1_hnRNPA_like, RNA recognition motif 1 in heterogeneous nuclear ...	328.07	0.00446137	0.00146652	-5.28726	-5.51359	-5.44986	-10.621	-10.6252	-5.43738	2.01032	0.114757	0.642153	3.04214	0.328716
gi|62822319|	19	22	17	18	14	17	46800	SSB, unknown .LARP_3, La RNA-binding domain of La-related protein 3RRM2_La, RNA recognition motif 2 in La autoantigen (La or LARP3)...RRM1_La, RNA recognition motif 1 in La autoantigen (La or LARP3)...	410.526	0.000821877	0.000642792	-7.21855	-6.92157	-7.20013	-7.23427	-7.48213	-7.34799	2.01426	0.114243	0.642153	1.2786	0.782103
gi|401709932|	3	4	1	0	2	0	41500	IST1, IST1 homolog isoform c .Ist1, Regulator of Vps4 activity in the MVB pathway	364.035	0.000147647	5.07371e-05	-8.81601	-8.41082	-9.53668	-10.725	-9.1198	-10.7831	2.02304	0.113106	0.642153	2.91005	0.343637
gi|47678643|	12	7	8	3	6	8	23300	RANBP1, RANBP1 .RanBD_RanBP1, Ran-binding domain	204.386	0.000777406	0.000469765	-6.9658	-7.32276	-7.22483	-8.20185	-7.58705	-7.37269	2.03224	0.111927	0.642153	1.65488	0.604273
gi|217416369|	21	13	12	14	9	7	22400	SAR1A, GTP-binding protein SAR1a .COG1100, GTPase SAR1 and related small G proteins [General funct...Sar1, Sar1 is an essential component of COPII vesicle coats	196.491	0.0013462	0.000842887	-6.38409	-6.69558	-6.79978	-6.74107	-7.16817	-7.45847	2.04232	0.110652	0.642153	1.59713	0.626124
gi|9956045|	10	2	5	0	4	0	20300	similar to Homo sapiens bet3 (BET3),mRNA with GenBank Accession Number AF041432 .TRAPP, Transport protein particle (TRAPP) component	178.07	0.000567761	0.000163405	-7.00232	-8.28354	-7.52232	-10.0099	-7.81694	-10.0681	2.04524	0.110285	0.642153	3.47455	0.287807
gi|6912582|	1	3	6	1	0	1	30400	PEF1, peflin .EFh (3&times;), EF-hand, calcium binding motifEF-hand_7 (2&times;), EF-hand domain pair	266.667	0.00024994	6.83017e-05	-9.35206	-8.35089	-7.75909	-9.31513	-10.418	-9.37328	2.06967	0.107271	0.642153	3.65935	0.273272
gi|158260039|	22	19	14	13	17	11	11700	unnamed protein product .TRX_family, TRX family	102.632	0.00309188	0.00217217	-5.68915	-5.67838	-6.00189	-6.16305	-5.90778	-6.38155	2.08431	0.105508	0.642153	1.4234	0.702541
gi|62088774|	136	159	127	113	126	83	139100	Collagen alpha 1 chain precursor variant, partial .Collagen (7&times;), Collagen triple helix repeat (20 copies)COLFI, Fibrillar collagens C-terminal domainVWC, von Willebrand factor type C domain	1220.18	0.00196939	0.00139184	-6.36195	-6.05236	-6.30352	-6.50955	-6.40535	-6.87465	2.08829	0.105033	0.642153	1.41496	0.706736
gi|51599156|	2	1	3	0	1	1	217900	CHD4, chromodomain-helicase-DNA-binding protein 4 .DEXDc, DEAD-like helicases superfamily. A diverse family of prot...SNF2_N, SNF2 family N-terminal domainCHDCT2, CHDCT2 (NUC038) domainCHDNT, CHDNT (NUC034) domainPHD (2&times;), PHD-fingerDUF1087, Domain of Unknown Function (DUF1087)DUF1086, Domain of Unknown Function (DUF1086)AIF-MLS, Mitochondria Localisation SequenceCHROMO (2&times;), Chromati…	1911.4	2.21226e-05	9.51719e-06	-10.8108	-11.1678	-10.3477	-12.3833	-11.289	-11.3429	2.09407	0.104349	0.642153	2.32448	0.430203
gi|189053246|	34	25	19	22	19	20	15900	unnamed protein product .Cu-Zn_Superoxide_Dismutase, Copper/zinc superoxide dismutase (SOD). superoxide ...	139.474	0.00318494	0.00234383	-5.56844	-5.71685	-6.01235	-5.95896	-6.1063	-6.1102	2.09539	0.104194	0.642153	1.35886	0.735909
gi|9956014|	33	27	32	26	31	24	28800	similar to Homo sapiens phosphoglycerate mutase (PGAM-B) mRNA with GenBank Accession Number J04173.1 .HP_PGM_like, Histidine phosphatase domain found in phosphoglycer...	252.632	0.00208586	0.0017106	-6.19191	-6.2354	-6.09558	-6.38939	-6.22078	-6.52601	2.09759	0.103936	0.642153	1.21937	0.820097
gi|189053583|	2	2	2	0	2	0	52500	unnamed protein product .Peptidase_C1B, Peptidase C1B subfamily (MEROPS database nomencla...	460.526	9.21692e-05	4.01064e-05	-9.3876	-9.23373	-9.26097	-10.9601	-9.35492	-11.0183	2.1027	0.103338	0.642153	2.29811	0.43514
gi|63996032|	5	4	1	0	2	0	21400	MOB4A, unknown, partial .Mob1_phocein, Mob1/phocein family	187.719	0.000341119	9.8392e-05	-7.70172	-7.74852	-8.87437	-10.0627	-8.4575	-10.1208	2.15934	0.0969605	0.630243	3.46694	0.288439
gi|194239674|	5	8	4	0	0	5	35200	CRYZ, quinone oxidoreductase isoform a .Qor, NADPH:quinone reductase and related Zn-dependent oxidoreduc...zeta_crystallin, Zeta-crystallin with NADP-dependent quinone red...	308.772	0.000341805	0.00010693	-8.19938	-7.61019	-8.27342	-10.5603	-10.5646	-8.22061	2.17014	0.0957955	0.627087	3.19653	0.312839
gi|62822072|	3	1	2	1	0	1	34600	CGI-105, unknown .FAA_hydrolase, Fumarylacetoacetate (FAA) hydrolase familyMhpD, 2-keto-4-pentenoate hydratase/2-oxohepta-3-ene-1,7-dioic a...	303.509	0.000137033	6.00107e-05	-8.63417	-9.3276	-8.84401	-9.44454	-10.5474	-9.5027	2.17034	0.0957732	0.627087	2.28348	0.437928
gi|189053967|	11	9	16	8	9	5	28800	unnamed protein product .LRR_4, Leucine Rich repeats (2 copies)	252.632	0.000840918	0.00048898	-7.26111	-7.29829	-6.77346	-7.52646	-7.41948	-8.01993	2.17241	0.0955517	0.627087	1.71974	0.581484
gi|4502847|	3	1	2	0	1	1	18600	CIRBP, cold-inducible RNA-binding protein .RRM_CIRBP_RBM3, RNA recognition motif in cold inducible RNA binding ...	163.158	0.000254912	0.000111494	-8.01348	-8.7069	-8.22332	-9.92246	-8.82809	-8.882	2.1803	0.0947131	0.627087	2.28632	0.437384
gi|189066676|	4	3	3	3	0	0	21800	unnamed protein product .Complex1_LYR, Complex 1 protein (LYR family)	191.228	0.000337648	0.000124729	-7.92091	-8.01835	-8.04559	-8.1353	-10.0855	-10.1394	2.20871	0.0917581	0.618195	2.70706	0.369404
gi|63025214|	2	2	2	0	0	2	11300	VMA21, vacuolar ATPase assembly integral membrane protein VMA21 .VMA21, VMA21-like domain	99.1228	0.00042822	0.000180708	-7.85159	-7.69772	-7.72496	-9.42411	-9.42835	-7.87282	2.21231	0.0913906	0.618195	2.36967	0.421999
gi|189054031|	5	3	8	4	1	1	30200	unnamed protein product .PRK06074, NADH dehydrogenase subunit C	264.912	0.000373319	0.000149244	-8.04617	-8.34429	-7.48422	-8.20992	-9.31277	-9.36668	2.21595	0.0910213	0.618195	2.50139	0.399777
gi|158261315|	4	5	5	4	0	0	88800	unnamed protein product .CSP_CDS (2&times;), Cold-Shock Protein (CSP) contains an S1-like cold-shock...SUZ-C, SUZ-C motifCSD, -Cold-shock- DNA-binding domainCSP (2&times;), Cold shock protein domain	778.947	0.00011328	3.7471e-05	-9.32539	-8.97085	-8.99809	-9.28846	-11.4899	-11.5438	2.22972	0.0896389	0.617438	3.02313	0.330783
gi|221043146|	54	27	15	7	20	8	62700	unnamed protein product .Caldesmon, Caldesmon	550	0.00097404	0.00034864	-6.48324	-7.01338	-7.61397	-8.42961	-7.42833	-8.3626	2.25614	0.0870516	0.60437	2.79383	0.357932
gi|189069081|	3	1	5	0	1	1	31500	unnamed protein product .LRR_8 (2&times;), Leucine rich repeatLRR_4, Leucine Rich repeats (2 copies)LRR_RI, Leucine-rich repeats (LRRs), ribonuclease inhibitor (RI)...	276.316	0.000213895	6.58348e-05	-8.5403	-9.23373	-7.96169	-10.4493	-9.35492	-9.40883	2.2643	0.0862692	0.60437	3.24896	0.307791
gi|158260685|	3	1	5	0	1	1	97500	unnamed protein product .Dynamin_M, Dynamin central regionCOG0699, Predicted GTPases (dynamin-related) [General function p...DLP_1, Dynamin_like protein family includes dynamins and Mx prot...GED, Dynamin GTPase effector domainPH_dynamin, Dynamin pleckstrin homology (PH) domain	855.263	6.91044e-05	2.12697e-05	-9.67017	-10.3636	-9.09155	-11.5792	-10.4848	-10.5387	2.2643	0.0862692	0.60437	3.24896	0.307791
gi|189066512|	4	4	7	4	2	2	48200	unnamed protein product .SF1_like-KH, Splicing factor 1 (SF1) K homology RNA-binding doma...	422.807	0.000222123	0.000117986	-8.71436	-8.56049	-8.0769	-8.67744	-9.26947	-9.32338	2.26532	0.0861725	0.60437	1.88262	0.531175
gi|189069170|	7	7	8	6	0	0	22400		196.491	0.000677772	0.000202863	-7.43724	-7.28336	-7.18544	-7.54341	-10.1126	-10.1665	2.27046	0.0856842	0.60437	3.34104	0.299308
gi|63992434|	11	2	6	1	3	1	10200	SNCA, unknown, partial .Synuclein, Synuclein	89.4737	0.00125267	0.000381734	-6.22312	-7.5953	-6.66703	-8.22308	-7.38002	-8.28123	2.27403	0.0853469	0.60437	3.28154	0.304735
gi|189053214|	38	45	29	23	32	27	28500	unnamed protein product .proteasome_beta_type_5, proteasome beta type-5 subunit. The 20S proteasome, ...20S_bact_beta, proteasome, beta subunit, bacterial type	250	0.00257251	0.00174625	-6.04232	-5.7214	-6.18196	-6.49906	-6.17906	-6.40003	2.27486	0.0852689	0.60437	1.47316	0.678811
gi|20379062|	25	17	20	17	19	20	23700	RAB8, small GTP binding protein RAB8 .Rab8_Rab10_Rab13_like, Rab GTPase families 8, 10, 13 (Rab8, Rab10, Rab13)PLN03118, Rab family protein	207.895	0.00171134	0.0014441	-6.26988	-6.49248	-6.3615	-6.60943	-6.50546	-6.50936	2.28462	0.0843554	0.60437	1.18506	0.843839
gi|189053683|	24	27	14	14	14	15	30600	unnamed protein product .F_actin_cap_B, F-actin capping protein, beta subunit	268.421	0.00139928	0.000866057	-6.56541	-6.29602	-6.9633	-7.05301	-7.05725	-7.04447	2.28699	0.084136	0.60437	1.61569	0.618929
gi|189053872|	5	2	8	3	0	0	34100	unnamed protein product .PTZ00319, NADH-cytochrome B5 reductasecyt_b5_reduct_like, Cytochrome b5 reductase catalyzes the reduction of ...	299.123	0.000310569	7.97385e-05	-8.16763	-8.80221	-7.60568	-8.58269	-10.5328	-10.5868	2.29592	0.0833119	0.60437	3.89485	0.25675
gi|158261943|	3	3	5	3	1	1	41900	unnamed protein product .MDR3, Medium chain dehydrogenases/reductase (MDR)/zinc-dependent...Qor, NADPH:quinone reductase and related Zn-dependent oxidoreduc...	367.544	0.000193444	9.30509e-05	-8.8256	-8.67173	-8.24698	-8.78868	-9.64022	-9.69413	2.32874	0.0803629	0.60437	2.07891	0.481022
gi|110590509|	3	3	4	3	2	2	35500	Chain D, Crystal Structure Of A GlyoxylateHYDROXYPYRUVATE REDUCTASE FROM HOMO Sapiens.LdhA, Lactate dehydrogenase and related dehydrogenases [Energy p...Domain 7, NCBI Domains2-Hacid_dh_C, D-isomer specific 2-hydroxyacid dehydrogenase, NAD ...Domain 8, NCBI Domains	311.404	0.000209574	0.000143059	-8.65985	-8.50598	-8.2819	-8.62292	-8.96364	-9.01755	2.3328	0.0800061	0.60437	1.46495	0.682616
gi|189065450|	37	22	24	22	23	20	20800	unnamed protein product .COG1100, GTPase SAR1 and related small G proteins [General funct...Rap1, Rap1 family GTPase consists of Rap1a and Rap1b isoforms	182.456	0.00258054	0.00190817	-5.75369	-6.11064	-6.05273	-6.22759	-6.18835	-6.37884	2.34206	0.0791994	0.60437	1.35236	0.739446
gi|62088808|	7	7	22	4	5	2	164000	alpha 2 macroglobulin variant, partial .A2M_N, MG2 domainMG1, Alpha-2-macroglobulin MG1 domainA2M_comp, A-macroglobulin complement componentA2M_recep, A-macroglobulin receptorA2M_2, Proteins similar to alpha2-macroglobulin (alpha (2)-M). T...A2M, Alpha-2-macroglobulin familyA2M_N_2 (2&times;), Alpha-2-macroglobulin family N-terminal region	1438.6	0.00014938	4.57575e-05	-9.42804	-9.27417	-8.2028	-9.90194	-9.70552	-10.5479	2.34629	0.0788341	0.60437	3.26459	0.306317
gi|90403024|	6	9	5	4	4	5	103500	AP1B1, AP1B1 .Adaptin_N, Adaptin N terminal regionARM, Armadillo/beta-catenin-like repeats. An approximately 40 am...B2-adapt-app_C, Beta2-adaptin appendage, C-terminal sub-domainAlpha_adaptinC2, Adaptin C-terminal domain	907.895	0.000134948	8.32889e-05	-9.11085	-8.57749	-9.15127	-9.44165	-9.44589	-9.29913	2.34992	0.078522	0.60437	1.62024	0.617193
gi|3252826|	8	3	6	2	4	2	40000	A-152E5.9, Unknown gene product .CIAPIN1, Cytokine-induced anti-apoptosis inhibitor 1, Fe-S bioge...	350.877	0.000292556	0.000142044	-7.89189	-8.62532	-8.03352	-9.07874	-8.4952	-9.1369	2.36824	0.076968	0.60437	2.05961	0.48553
gi|158254966|	14	20	14	10	13	8	29500	unnamed protein product .PRE1, 20S proteasome, alpha and beta subunits [Posttranslational...proteasome_alpha_type_1, proteasome_alpha_type_1. The 20S proteasome, ...	258.772	0.00109045	0.00065913	-7.05332	-6.55317	-6.92669	-7.33917	-7.0921	-7.60863	2.37321	0.0765529	0.60437	1.65438	0.604455
gi|189054205|	29	33	35	18	22	31	26900	unnamed protein product .GST_N_CLIC, GST_N family, Chloride Intracellular Channel (CLIC) ...O-ClC, intracellular chloride channel proteinGST_C_CLIC1, C-terminal, alpha helical domain of Chloride Intrac...	235.965	0.00237274	0.00159719	-6.25081	-5.96979	-5.93904	-6.68051	-6.48901	-6.20645	2.38914	0.0752384	0.60437	1.48557	0.673143
gi|189054827|	5	4	5	1	3	0	25000	unnamed protein product .HAD_like, Haloacid dehalogenase-like hydrolases. The haloacid de...Hydrolase, haloacid dehalogenase-like hydrolase	219.298	0.000398469	0.000132788	-7.85721	-7.90401	-7.73057	-9.11957	-8.27651	-10.2763	2.39452	0.0748001	0.60437	3.00079	0.333246
sp|SYH_HUMAN|	6	7	8	5	0	0	57400	Histidine--tRNA ligase, cytoplasmic; EC 6.1.1.21; Histidyl-tRNA synthetase; HisRS;	503.509	0.000254282	6.85675e-05	-8.52132	-8.22435	-8.12643	-8.65145	-11.0536	-11.1075	2.41923	0.0728237	0.60437	3.70849	0.269651
gi|189053332|	1	3	11	1	0	0	28700	unnamed protein product .PA28_beta, Proteasome activator pa28 beta subunitPA28_alpha, Proteasome activator pa28 alpha subunit	251.754	0.000380675	5.23482e-05	-9.29451	-8.29334	-7.131	-9.25759	-10.3604	-10.4144	2.42636	0.0722644	0.60437	7.27199	0.137514
gi|189069455|	4	3	4	0	0	3	26600	unnamed protein product .2A43, Lysosomal Cystine TransporterPQ-loop (2&times;), PQ loop repeat	233.333	0.000301736	9.83451e-05	-8.11991	-8.21736	-7.99328	-10.2802	-10.2845	-8.39246	2.4352	0.0715781	0.60437	3.06813	0.325931
gi|193787871|	6	12	6	0	5	0	85800		752.632	0.000194452	4.57214e-05	-8.9233	-8.1155	-8.79666	-11.4513	-9.05767	-11.5095	2.43674	0.0714591	0.60437	4.25298	0.23513
gi|158258871|	55	62	63	35	48	54	28100	unnamed protein product .14-3-3_beta_zeta, 14-3-3 beta and zeta isoforms of 14-3-3 protein	246.491	0.00418268	0.00292733	-5.66247	-5.38981	-5.40118	-6.07239	-5.7646	-5.70188	2.49442	0.0671663	0.60437	1.42884	0.699869
gi|158255696|	1	5	2	0	1	0	24700	unnamed protein product .DUF1241, Protein of unknown function (DUF1241)	216.667	0.000255224	6.07214e-05	-9.14442	-7.69126	-8.50696	-10.2061	-9.11174	-10.2643	2.50844	0.0661672	0.60437	4.20321	0.237914
gi|57222565|	2	2	5	1	1	0	35600	PPP2CB, serine/threonine-protein phosphatase 2A catalytic subunit beta isoform .MPP_PP2A_PP4_PP6, PP2A, PP4, and PP6 phosphoprotein phosphatases, ...PTZ00239, serine/threonine protein phosphatase 2A	312.281	0.000192	5.92181e-05	-8.99913	-8.84526	-8.08404	-9.47304	-9.47728	-10.6298	2.54828	0.0634209	0.60437	3.24226	0.308427
gi|62420873|	3	1	2	1	1	1	51400	ILK, integrin-linked protein kinase isoform 1 .Pkinase_Tyr, Protein tyrosine kinaseAnk_4, Ankyrin repeats (many copies)PKc_like, Protein Kinases, catalytic domainANK, ankyrin repeatsAnk_2, Ankyrin repeats (3 copies)	450.877	9.22443e-05	5.21817e-05	-9.02995	-9.72338	-9.23979	-9.84033	-9.84457	-9.89848	2.57123	0.0618985	0.60437	1.76775	0.565691
gi|62088990|	5	4	7	0	3	1	56100	carrier family 6, member 8 variant, partial .Peptidase_S10, Serine carboxypeptidase	492.105	0.000201294	5.85622e-05	-8.66547	-8.71227	-8.22868	-11.0264	-9.08477	-9.98598	2.57317	0.0617712	0.60437	3.43727	0.290928
gi|158259419|	9	7	20	4	6	4	35100	unnamed protein product .ETF_alpha, Electron transfer flavoprotein FAD-binding domainETF_alpha, The electron transfer flavoprotein (ETF) serves as a ...PLN00022, electron transfer flavoprotein subunit alpha	307.895	0.000693446	0.00026376	-7.64999	-7.7325	-6.75422	-8.36028	-7.9968	-8.41843	2.58785	0.0608218	0.60437	2.62908	0.380361
gi|158255706|	4	3	4	2	1	0	30300	unnamed protein product .PLPDE_III_YBL036c_euk, Pyridoxal 5-phosphate (PLP)-binding TIM barrel ...	265.789	0.00026489	8.96538e-05	-8.25015	-8.34759	-8.12352	-8.80101	-9.31608	-10.4686	2.59067	0.0606414	0.60437	2.95459	0.338457
gi|158257628|	1	2	4	0	1	0	28500	unnamed protein product .HAD_like, Haloacid dehalogenase-like hydrolases. The haloacid de...HAD-SF-IIA-hyp3, HAD-superfamily subfamily IIA hydrolase, TIGR01458	250	0.000195911	5.26252e-05	-9.28752	-8.62282	-8.06227	-10.3492	-9.25484	-10.4074	2.61068	0.0593779	0.60437	3.72277	0.268617
gi|47678755|	28	33	32	16	18	29	28200	YWHAH, YWHAH .14-3-3_eta, 14-3-3 eta, an isoform of 14-3-3 protein	247.368	0.00217178	0.00135379	-6.3325	-6.01698	-6.07453	-6.84212	-6.73195	-6.31924	2.62778	0.0583218	0.60437	1.60422	0.623355
gi|111118976|	2	4	5	1	2	1	141700	COL2A1, collagen alpha-1(II) chain isoform 1 precursor .Collagen (11&times;), Collagen triple helix repeat (20 copies)COLFI, Fibrillar collagens C-terminal domainVWC, von Willebrand factor type C domain	1242.98	5.78888e-05	2.32033e-05	-10.3805	-9.63884	-9.46541	-10.8544	-10.3478	-10.9126	2.63235	0.058043	0.60437	2.49485	0.400826
gi|301129290|	2	4	1	0	1	0	32900	PPP2R4, serine/threonine-protein phosphatase 2A activator isoform e .PTPA, Phosphotyrosyl phosphatase activator (PTPA) is also known ...	288.596	0.000168422	4.55872e-05	-8.92026	-8.1786	-9.30445	-10.4928	-9.3984	-10.5509	2.69416	0.0544227	0.60437	3.6945	0.270673
gi|189067453|	2	1	4	0	1	0	26200	unnamed protein product .Collagen, Collagen triple helix repeat (20 copies)GLECT, Galectin/galactose-binding lectin. This domain exclusivel...	229.825	0.000209387	5.72449e-05	-8.69255	-9.0495	-7.97813	-10.2651	-9.17069	-10.3232	2.74964	0.0513932	0.592949	3.65774	0.273393
gi|189069286|	18	19	24	11	17	11	28900	unnamed protein product .Mt_ATP-synt_B, Mitochondrial ATP synthase B chain precursor (ATP...	253.509	0.00140084	0.000837291	-6.78915	-6.58263	-6.38162	-7.22765	-6.81204	-7.2858	2.75825	0.0509412	0.592949	1.67306	0.597708
gi|189066536|	2	3	1	1	0	0	37100		325.439	0.000130923	4.04958e-05	-9.04041	-8.55006	-9.4246	-9.51431	-10.6172	-10.6711	2.78079	0.0497781	0.589041	3.23301	0.309309
gi|189065386|	18	23	21	13	8	16	57200	unnamed protein product .AP_delta-COPI_MHD, Mu homology domain (MHD) of adaptor protein (AP) ...	501.754	0.000720684	0.000399167	-7.47186	-7.07876	-7.19495	-7.75002	-8.21688	-7.6075	2.79818	0.0489021	0.58619	1.80547	0.553872
gi|158254970|	41	45	42	34	39	36	57400	unnamed protein product .groEL, chaperonin GroELTCP1_beta, TCP-1 (CTT or eukaryotic type II) chaperonin family, ...	503.509	0.00145864	0.00114749	-6.66743	-6.42154	-6.51699	-6.81524	-6.68414	-6.81704	2.81875	0.0478891	0.58619	1.27116	0.786685
gi|189053415|	15	12	23	10	7	4	28600	unnamed protein product .LRR_4, Leucine Rich repeats (2 copies)	250.877	0.0011634	0.000472511	-6.95565	-7.01688	-6.41285	-7.30819	-7.6489	-8.21364	2.8442	0.0466689	0.58619	2.46216	0.406148
gi|38679884|	5	2	5	0	0	2	20300	SRI, sorcin isoform B .EFh (3&times;), EF-hand, calcium binding motifEF-hand_7 (2&times;), EF-hand domain pair	178.07	0.000423354	0.000100591	-7.64895	-8.28354	-7.52232	-10.0099	-10.0142	-8.45864	2.94631	0.0421235	0.560595	4.20865	0.237606
gi|8923390|	12	6	9	1	3	5	26100	CHCHD3, coiled-coil-helix-coiled-coil-helix domain-containing protein 3, mitochondrial precursor .CHCH, CHCH domainDUF737, Protein of unknown function (DUF737)	228.947	0.000693302	0.000237149	-7.07929	-7.57934	-7.22709	-9.16263	-8.31957	-7.92149	2.97026	0.0411335	0.558327	2.92348	0.342058
gi|41472304|	3	2	3	1	1	0	17100	WBSCR1, unknown, partial .RRM, RRM (RNA recognition motif), also known as RBD (RNA binding...COG0724, RNA-binding proteins (RRM domain) [General function pre...	150	0.000356176	0.000123284	-7.92939	-8.11199	-7.80276	-8.73977	-8.74401	-9.89653	2.98252	0.0406376	0.558327	2.88906	0.346133
gi|189065552|	4	4	1	0	1	0	83400	unnamed protein product .squalene_cyclas, squalene/oxidosqualene cyclasesSQCY_1, Squalene cyclase (SQCY) domain subgroup 1	731.579	8.04995e-05	1.79834e-05	-9.26265	-9.10878	-10.2346	-11.423	-10.3286	-11.4811	2.99729	0.0400487	0.558327	4.47632	0.223398
gi|48762934|	70	88	89	54	61	42	129200	COL1A2, collagen alpha-2(I) chain precursor .Collagen (9&times;), Collagen triple helix repeat (20 copies)COLFI, Fibrillar collagens C-terminal domain	1133.33	0.00124929	0.000733775	-6.94883	-6.56757	-6.58357	-7.16932	-7.05272	-7.47616	3.00411	0.0397805	0.558327	1.70255	0.587353
gi|21739763|	3	2	4	1	1	0	112400	DKFZp761H0722, hypothetical protein, partial .PHA03307, transcriptional regulator ICP4PHA03381, tegument protein VP22	985.965	6.01073e-05	1.87559e-05	-9.81238	-9.99498	-9.43443	-10.6228	-10.627	-11.7795	3.01467	0.0393692	0.558327	3.20471	0.31204
gi|158261653|	3	2	6	0	1	1	15900	unnamed protein product .Lipocalin, Lipocalin / cytosolic fatty-acid binding protein fami...	139.474	0.000508613	0.000130427	-7.85663	-8.03924	-7.11096	-9.76562	-8.67125	-8.72516	3.04096	0.0383663	0.558327	3.89958	0.256438
gi|9652259|	9	9	10	7	6	4	38500	SLP2, stomatin-like protein 2 .SPFH_paraslipin, Paraslipin or slipin-2 (SLP-2, a subgroup of the ...HflC, Membrane protease subunits, stomatin/prohibitin homologs [...	337.719	0.000494888	0.00028787	-7.74245	-7.58857	-7.51573	-7.94191	-8.08925	-8.51089	3.08593	0.0367192	0.558327	1.71914	0.581687
gi|158256956|	4	4	2	2	1	1	95600	unnamed protein product .SAP, Putative DNA-binding (bihelical) motif predicted to be invo...AAA_17, AAA domainSPRY_hnRNP, SPRY domain in heterogeneous nuclear ribonucleoprote...AAA_33, AAA domain	838.596	7.71873e-05	3.44193e-05	-9.39917	-9.2453	-9.86033	-9.95004	-10.4651	-10.519	3.12777	0.0352609	0.558327	2.24256	0.44592
gi|194378386|	9	7	14	5	4	2	20500	unnamed protein product .MCT1_N, N-terminal domain of multiple copies T cell malignancies...COG2016, Predicted RNA-binding protein (contains PUA domain) [Tr...PUA, PUA domain	179.825	0.000992552	0.000366186	-7.11221	-7.19473	-6.56272	-7.62183	-7.82674	-8.46844	3.1442	0.0347071	0.558327	2.71051	0.368934
gi|189053900|	4	2	4	1	1	0	32200	unnamed protein product .PITH, PITH domainTRX_family, TRX family	282.456	0.000228023	6.54709e-05	-8.31097	-8.74488	-8.18434	-9.37266	-9.3769	-10.5294	3.20047	0.032886	0.551887	3.48282	0.287124
gi|189053213|	61	50	64	46	37	51	22800	unnamed protein product .IbpA, Molecular chaperone (small heat shock protein) [Posttransl...ACD_HspB1_like, Alpha crystallin domain (ACD) found in mammalian ...	200	0.00497854	0.00353352	-5.3508	-5.39399	-5.17654	-5.59346	-5.81282	-5.54949	3.2801	0.0304979	0.531124	1.40895	0.70975
gi|15277275|	2	2	5	1	0	0	29600	DDAH, NG-dimethylarginine dimethylamino hydrolase homolog .Amidinotransf, Amidinotransferase	259.649	0.000230919	5.07565e-05	-8.81456	-8.66069	-7.89947	-9.28846	-10.3913	-10.4452	3.35988	0.0283081	0.522567	4.54955	0.219802
gi|158254392|	2	1	10	0	0	0	13900	unnamed protein product .Dispanin, Interferon-induced transmembrane protein	121.93	0.000681913	6.43199e-05	-8.05868	-8.41563	-6.49696	-9.63119	-9.63543	-9.68934	3.38438	0.0276732	0.521272	10.6019	0.0943227
gi|189053429|	6	12	12	4	4	3	26200	unnamed protein product .NUDIX_2, Nucleotide hydrolase	229.825	0.000789185	0.000285208	-7.73704	-6.92924	-6.95648	-8.06784	-8.07208	-8.3773	3.39762	0.0273372	0.521272	2.76705	0.361395
gi|189055126|	8	5	6	4	5	5	22500		197.368	0.000580883	0.000410052	-7.31653	-7.59797	-7.45816	-7.91559	-7.71916	-7.77307	3.44462	0.0261829	0.517124	1.41661	0.705912
gi|189065239|	14	14	17	9	10	6	27900	unnamed protein product .PRK03996, proteasome subunit alphaproteasome_alpha_type_7, proteasome_alpha_type_7. The 20S proteasome, ...	244.737	0.00107749	0.000568843	-6.99756	-6.84368	-6.68287	-7.38349	-7.28765	-7.82113	3.49599	0.0249869	0.512509	1.89417	0.527936
gi|189053899|	18	21	18	9	12	15	60200	unnamed protein product .hnRNP-L_PTB, hnRNP-L/PTB/hephaestus splicing factor familyRRM4_hnRNPL, RNA recognition motif 4 in vertebrate heterogeneous ...RRM3_hnRNPL, RNA recognition motif 3 in vertebrate heterogeneous ...RRM2_hnRNPL, RNA recognition motif 2 in vertebrate heterogeneous ...RRM1_hnRNPL, RNA recognition motif 1 in vertebrate heterogeneous ...	528.07	0.00062889	0.000369569	-7.52298	-7.21883	-7.39635	-8.15254	-7.88234	-7.72114	3.509	0.0246942	0.512509	1.70168	0.587653
gi|193785169|	21	21	23	18	13	14	29500	unnamed protein product Calponin (3&times;), Calponin family repeat	258.772	0.00145577	0.000940847	-6.65942	-6.50554	-6.44384	-6.77277	-7.0921	-7.07455	3.63973	0.0219698	0.471584	1.5473	0.646287
gi|20379050|	4	6	6	0	0	2	23700	RAB5B, small GTP binding protein RAB5B .PLN03110, Rab GTPaseRab5_related, Rab-related GTPase family includes Rab5 and Rab22	207.895	0.000481371	8.61605e-05	-8.00448	-7.48288	-7.51012	-10.1648	-10.169	-8.61349	3.64008	0.0219631	0.471584	5.58692	0.17899
gi|451687031|	2	4	7	0	1	0	25500	COX2, cytochrome c oxidase subunit II (mitochondrion) .COX2_TM, Cytochrome C oxidase subunit II, transmembrane domainCOX2, cytochrome c oxidase subunit IICcO_II_C, C-terminal domain of Cytochrome c Oxidase subunit II	223.684	0.000373872	5.88164e-05	-8.66547	-7.92381	-7.44022	-10.238	-9.14361	-10.2961	3.64043	0.0219563	0.471584	6.35659	0.157317
gi|63992373|	80	62	67	48	55	66	35900	ANXA5, unknown .Annexin (4&times;), Annexin	314.912	0.00375634	0.00282158	-5.53556	-5.63478	-5.58506	-6.00533	-5.87475	-5.74784	3.65107	0.0217509	0.471584	1.33129	0.751151
gi|189053122|	33	13	17	2	8	2	17300	unnamed protein product .Stathmin, Stathmin family	151.754	0.00234206	0.000468489	-5.68224	-6.43722	-6.20495	-8.24057	-7.02104	-8.29872	3.69299	0.0209637	0.471584	4.99917	0.200033
gi|189067539|	10	9	12	8	7	7	37000	unnamed protein product .PLN03246, 26S proteasome regulatory subunitMPN_RPN7_8, Mpr1p, Pad1p N-terminal (MPN) domains without cataly...	324.561	0.000566767	0.000378893	-7.60262	-7.54883	-7.30164	-7.77701	-7.90641	-7.96032	3.6934	0.0209562	0.471584	1.49585	0.668517
gi|189054517|	3	2	2	0	1	0	51800	unnamed protein product .ThiF, Dinucleotide-utilizing enzymes involved in molybdopterin a...Uba3_RUB, Ubiquitin activating enzyme (E1) subunit UBA3. UBA3 is...E2_bind, E2 binding domain	454.386	0.000104733	2.8954e-05	-9.03771	-9.22031	-9.24755	-10.9467	-9.85232	-11.0048	3.76447	0.0196986	0.471584	3.61722	0.276455
gi|189065420|	41	31	33	32	32	34	31900	unnamed protein product .RRM_hnRNPC, RNA recognition motif in vertebrate heterogeneous nu...	279.825	0.00213679	0.00185771	-6.07999	-6.20183	-6.16751	-6.28752	-6.29176	-6.28595	3.81793	0.0188116	0.471584	1.15023	0.869392
gi|62087374|	2	5	3	0	0	1	81800	IPO4 protein variant, partial .HEAT, HEAT repeatHEAT_2, HEAT repeats	717.544	9.23689e-05	1.79465e-05	-9.83107	-8.88874	-9.36796	-11.4036	-11.4078	-10.3631	3.84189	0.0184298	0.471584	5.1469	0.194292
gi|62822160|	25	20	19	17	13	12	39600	HNRPA3, unknown .RRM1_hnRNPA3, RNA recognition motif 1 in heterogeneous nuclear r...RRM2_hnRNPA3, RNA recognition motif 2 in heterogeneous nuclear r...HnRNPA1, Nuclear factor hnRNPA1	347.368	0.00105921	0.000656532	-6.78323	-6.84761	-6.92486	-7.12278	-7.38654	-7.51741	3.98453	0.0163393	0.471584	1.61335	0.61983
gi|32189392|	55	50	51	30	38	45	21900	PRDX2, peroxiredoxin-2 .AhpC, Peroxiredoxin [Posttranslational modification, protein tur...PRX_Typ2cys, Peroxiredoxin (PRX) family, Typical 2-Cys PRX subfa...	192.105	0.0046275	0.00310469	-5.41318	-5.35372	-5.36135	-5.97492	-5.74623	-5.63308	3.99621	0.016181	0.471584	1.49049	0.670921
gi|158260569|	7	6	7	0	2	0	25800	unnamed protein product .DHPR_SDR_c_like, dihydropteridine reductase (DHPR), classical (c) ...PRK12828, short chain dehydrogenase	226.316	0.000536156	8.16119e-05	-7.57855	-7.56778	-7.45192	-10.2497	-8.64448	-10.3078	4.02774	0.015763	0.471584	6.56958	0.152217
gi|189053364|	16	10	13	5	6	9	18500	unnamed protein product .Mt_ATP-synt_D, ATP synthase D chain, mitochondrial (ATP5H)	162.281	0.00139662	0.000688443	-6.45749	-6.7556	-6.53153	-7.51918	-7.35637	-7.03079	4.25752	0.0130794	0.471584	2.02866	0.492937
gi|20379052|	10	10	8	7	5	6	23500	RAB5C, small GTP binding protein RAB5C .PLN03110, Rab GTPaseRab5_related, Rab-related GTPase family includes Rab5 and Rab22	206.14	0.000808188	0.000494689	-7.1487	-6.99483	-7.23338	-7.44825	-7.76265	-7.64951	4.28334	0.0128136	0.471584	1.63373	0.612096
gi|158260241|	8	6	7	4	2	2	28700	unnamed protein product .COG1500, Predicted exosome subunit [Translation, ribosomal struc...SBDS, Shwachman-Bodian-Diamond syndrome (SBDS) proteinSBDS_C, SBDS protein C-terminal domain	251.754	0.000502408	0.000198151	-7.55991	-7.6743	-7.55844	-8.15897	-8.751	-8.80491	4.62871	0.0098167	0.453041	2.53549	0.394402
gi|41393554|	4	12	6	1	0	0	43700	LUC7L, putative RNA-binding protein Luc7-like 1 isoform b .LUC7, LUC7 N_terminusLUC7, U1 snRNP component, mediates U1 snRNP association with cap...	383.333	0.000354952	3.43797e-05	-8.61635	-7.44083	-8.12199	-9.67804	-10.7809	-10.8348	4.66716	0.00953852	0.453041	10.3245	0.0968572
gi|193785751|	3	3	3	0	0	1	32300	unnamed protein product .RRM, RRM (RNA recognition motif), also known as RBD (RNA binding...COG0724, RNA-binding proteins (RRM domain) [General function pre...	283.333	0.000209735	4.54497e-05	-8.56538	-8.41151	-8.43875	-10.4744	-10.4786	-9.43391	4.72443	0.00914163	0.453041	4.61466	0.216701
gi|189053940|	1	3	3	0	0	0	33700	unnamed protein product .PKc_like, Protein Kinases, catalytic domainS_TKc, Serine/Threonine protein kinases, catalytic domain	295.614	0.000166227	2.65296e-05	-9.45511	-8.45394	-8.48118	-10.5168	-10.521	-10.575	5.27837	0.00617695	0.335372	6.26572	0.159599
gi|189054766|	4	1	4	0	0	0	20600	unnamed protein product .Rap2, Rap2 family GTPase consists of Rap2a, Rap2b, and Rap2c	180.702	0.00032323	4.34003e-05	-7.86429	-8.80903	-7.73766	-10.0246	-10.0288	-10.0827	5.63748	0.00487292	0.281107	7.44763	0.134271
gi|189053183|	11	7	8	2	3	4	24000	unnamed protein product .HMGB-UBF_HMG-box (2&times;), HMGB-UBF_HMG-box, class II and III members of the ...	210.526	0.000730302	0.000259332	-7.07879	-7.35236	-7.25443	-8.56792	-8.23569	-8.03828	6.04561	0.00377618	0.232361	2.81609	0.355102
gi|7706339|	7	6	6	2	2	1	18200	PPIL1, peptidyl-prolyl cis-trans isomerase-like 1 .cyclophilin_SpCYP2_like, cyclophilin_SpCYP2_like: cyclophilin 2-like ...	159.649	0.000723483	0.00021408	-7.2296	-7.21883	-7.24607	-8.29129	-8.29553	-8.86026	6.61404	0.00270917	0.216637	3.3795	0.295902
gi|158259985|	2	4	6	0	0	0	44600	unnamed protein product .NAAA-beta, beta subunit of N-acylethanolamine-hydrolyzing acid a...Ntn_AC_NAAA, AC_NAAA This conserved domain includes two closely ...	391.228	0.00019884	2.00459e-05	-9.22452	-8.48286	-8.14238	-10.797	-10.8013	-10.8552	6.87866	0.00234043	0.216637	9.91926	0.100814
gi|158261343|	2	3	4	0	0	0	26600	unnamed protein product .DHRS6_like_SDR_c, human DHRS6-like, classical (c) SDRsPRK06138, short chain dehydrogenase	233.333	0.000257653	3.36108e-05	-8.7077	-8.21736	-7.99328	-10.2802	-10.2845	-10.3384	9.41949	0.0007081	0.0933681	7.6658	0.13045
gi|8923001|	3	5	6	0	0	0	33900	ABHD10, mycophenolic acid acyl-glucuronide esterase, mitochondrial isoform 1 precursor .Esterase_713_like, Novel bacterial esterase that cleaves esters on ...Peptidase_S9, Prolyl oligopeptidase familyAbhydrolase_6, Alpha/beta hydrolase family	297.368	0.000299068	2.63731e-05	-8.61373	-8.00787	-7.86806	-10.5227	-10.527	-10.5809	10.3669	0.000488756	0.0751869	11.3399	0.0881843
gi|189065149|	3	2	4	0	0	0	16500	unnamed protein product .Npc2_like, Niemann-Pick type C2 (Npc2) is a lysosomal protein in...	144.737	0.000409458	5.41847e-05	-7.89368	-8.07628	-7.51573	-9.80266	-9.8069	-9.86082	12.009	0.000275616	0.0508786	7.55671	0.132333
gi|8118530|	4	2	4	0	0	0	43200	endophilin B1 .BAR_Endophilin_B1, The Bin/Amphiphysin/Rvs (BAR) domain of Endop...SH3_Endophilin_B1, Src homology 3 domain of Endophilin-B1	378.947	0.000169962	2.06955e-05	-8.60484	-9.03876	-8.47821	-10.7651	-10.7694	-10.8233	12.1734	0.000261349	0.0508786	8.21249	0.121766
gi|4502171|	7	5	11	0	0	0	19600	APRT, adenine phosphoribosyltransferase isoform a .PRTases_typeI, Phosphoribosyl transferase (PRT)-type I domain	171.93	0.000806672	4.56146e-05	-7.30371	-7.45999	-6.74963	-9.97483	-9.97907	-10.033	13.0568	0.000198612	0.0508786	17.6845	0.0565467
gi|158261665|	11	11	13	0	0	0	22700	unnamed protein product .cyclophilin, cyclophilin: cyclophilin-type peptidylprolyl cis- t...	199.123	0.0010392	3.93853e-05	-7.0231	-6.86922	-6.73612	-10.1217	-10.1259	-10.1798	38.4268	2.7394e-06	0.00126423	26.3853	0.0378998
gi|27436946|	132	121	80	0	0	0	74100	LMNA, lamin isoform A .DegS, Sensor protein DegSLTD, Lamin Tail DomainApoLp-III_like (2&times;), Apolipophorin-III and similar insect proteinsFilament, Intermediate filament protein	650	0.00289252	1.20654e-05	-5.76191	-5.69471	-6.13361	-11.3047	-11.309	-11.3629	39.6489	2.41761e-06	0.00126423	239.737	0.00417125
